# Supplementary material
Source: PubMed Central journal article supplement (PMC4183627)
Supplement: ja505713y_si_001.pdf [file ja505713y_si_001.pdf]

## Supporting Information for:

### A Fibril-Like Assembly of Oligomers of a Peptide Derived from $\beta$ -Amyloid.

**Authors:** Johnny D. Pham, Ryan K. Spencer, Kevin H. Chen, and James S. Nowick\*

#### Affiliations:

Department of Chemistry, University of California, Irvine, Irvine, CA 92697-2025.

E-mail: jsnowick@uci.edu

#### This PDF file includes:

##### *Materials and Methods*

Synthesis of macrocyclic  $\beta$ -sheet peptides **3–6**. S3

X-ray data collection, data processing, and refinement of macrocyclic  $\beta$ -sheet peptide **3**. S3

##### *Supplemental Figures and Tables*

Fig. S1.  $^1\text{H}$  NMR spectra of macrocyclic  $\beta$ -sheet peptides **3–7** at various concentrations at 298 K  $\text{D}_2\text{O}$  at 500 MHz S6

Fig. S2. Downfield shifting of the  $^1\text{H}$  NMR  $\alpha$ -proton resonances of the **4** tetramer relative to the acyclic control. S7

Fig. S3. Key NOEs associated with folding and dimerization of macrocyclic  $\beta$ -sheet peptide **3**. S8

Fig. S4. Key NOEs associated with folding and dimerization of macrocyclic  $\beta$ -sheet peptide **4**. S8

Fig. S5. Key NOEs associated with folding and dimerization of macrocyclic  $\beta$ -sheet peptide **5**. S9

Table S1. Magnetic anisotropies of the  $\delta$ -protons of the  $\delta$ -linked ornithine turn units of peptides **3–6** in  $\text{D}_2\text{O}$  at 298 K S7

|                                                              |     |
|--------------------------------------------------------------|-----|
| <b>Peptide 3</b>                                             |     |
| HPLC trace and mass spectrum                                 | S10 |
| 1D <sup>1</sup> H NMR spectrum in D <sub>2</sub> O (500 MHz) | S14 |
| 2D TOCSY spectrum in D <sub>2</sub> O (500 MHz)              | S15 |
| 2D NOESY spectrum in D <sub>2</sub> O (500 MHz)              | S16 |
| 2D DOSY spectrum in D <sub>2</sub> O (600 MHz)               | S17 |
| <br>                                                         |     |
| <b>Peptide 4</b>                                             |     |
| HPLC trace and mass spectrum                                 | S18 |
| 2D <sup>1</sup> H NMR spectrum in D <sub>2</sub> O (500 MHz) | S22 |
| 2D TOCSY spectrum in D <sub>2</sub> O (500 MHz)              | S23 |
| 2D NOESY spectrum in D <sub>2</sub> O (500 MHz)              | S26 |
| 2D DOSY spectrum in D <sub>2</sub> O (600 MHz)               | S30 |
| <br>                                                         |     |
| <b>Peptide 5</b>                                             |     |
| HPLC trace and mass spectrum                                 | S31 |
| 1D <sup>1</sup> H NMR spectrum in D <sub>2</sub> O (500 MHz) | S35 |
| 2D TOCSY spectrum in D <sub>2</sub> O (500 MHz)              | S36 |
| 2D NOESY spectrum in D <sub>2</sub> O (500 MHz)              | S39 |
| 2D DOSY spectrum in D <sub>2</sub> O (600 MHz)               | S43 |
| <br>                                                         |     |
| <b>Peptide 6</b>                                             |     |
| HPLC trace and mass spectrum                                 | S44 |
| 1D <sup>1</sup> H NMR spectrum in D <sub>2</sub> O (500 MHz) | S47 |
| 2D ROESY spectrum in D <sub>2</sub> O (500 MHz)              | S48 |
| 2D DOSY spectrum in D <sub>2</sub> O (600 MHz)               | S49 |

## Materials and Methods:

Peptides **3–6** were prepared and studied as the trifluoroacetate (TFA) salts. <sup>1</sup>H NMR 1D, TOCSY, NOESY, ROESY, and DOSY experiments for peptides **3–6** were carried out as previously described.<sup>1</sup>

### *Synthesis of macrocyclic $\beta$ -sheet peptides 3–6.*

Macrocyclic  $\beta$ -sheet peptides **3–6** were synthesized using procedures previously reported for the synthesis of **1** and of other macrocyclic  $\beta$ -sheet peptides.<sup>2,3,4</sup> Boc-Orn(Fmoc)-OH was used to introduce the  $\delta$ -linked ornithine turn units. Fmoc-Hao-OH was used to introduce the unnatural amino acid Hao.<sup>3,5</sup> Standard Fmoc-protected amino acids were used to introduce the other residues: Fmoc-Ala-OH, Fmoc-Asp(OtBu)-OH, Fmoc-Gln(Trt)-OH, Fmoc-Glu(OtBu)-OH, Fmoc-Leu-OH, Fmoc-Lys(Boc)-OH, Fmoc-Phe-OH, Fmoc-Phe(*p*-iodo)-OH, Fmoc-Ser(OtBu)-OH, Fmoc-Thr(OtBu)-OH, Fmoc-Tyr(OtBu)-OH, and Fmoc-Val-OH.

---

<sup>1</sup> Pham, J. D.; Demeler, B.; Nowick, J. S. *J. Am. Chem. Soc.* **2014**, *136*, 5432–5442.

<sup>2</sup> Pham, J. D.; Chim, N.; Goulding, C. W.; Nowick, J. S. *J. Am. Chem. Soc.* **2013**, *135*, 12460–12467.

<sup>3</sup> Cheng, P.-N.; Nowick, J. S. *J. Org. Chem.* **2011**, *76*, 3166–3173.

<sup>4</sup> Cheng, P.-N.; Liu, C.; Zhao, M.; Eisenberg, D.; Nowick, J. S. *Nat. Chem.* **2012**, *4*, 927–933.

<sup>5</sup> Nowick, J. S.; Chung, D. M.; Maitra, K.; Maitra, S.; Stigers, K. D.; Sun, Y. J. *J. Am. Chem. Soc.* **2000**, *122*, 7654–7661.

*X-ray diffraction data collection, processing, and structure refinement.*

Crystals of macrocyclic  $\beta$ -sheet peptide **3** were flash-frozen in liquid nitrogen prior to data collection. Diffraction data for macrocyclic  $\beta$ -sheet peptide **3** were collected on beamline 7-1 at the Stanford Synchrotron Radiation Lightsource (Stanford, CA) at 1.00 Å wavelength to a resolution 1.75 Å at 100 K. [Data were collected at 1.00 Å wavelength to take advantage of the maximum flux of the beamline and obtain a reasonable anomalous signal from the iodine groups ( $f'' = 3.3$ ).] Data were collected over 180 degrees with a 0.5 degree oscillation. The data were integrated and scaled with XDS,<sup>6</sup> and merged with Aimless.<sup>7</sup> The space group was initially determined to be  $C222_1$ ; after an analysis of the data with Xtriage in the PHENIX software suite,<sup>8</sup> it became apparent (multivariate  $Z$  score  $L$ -test  $> 3.5$ ) that the data better fit a lower space group with pseudomerohedral twinning.<sup>9</sup> Data were reprocessed in the  $C2$  space group and refined with the appropriate twin law  $(-h, -k, l)$ .

---

<sup>6</sup> Kabsch, W. *Acta Crystallogr. Sect. D: Biol. Crystallogr.* **2010**, *66*, 125–132.

<sup>7</sup> (a) Evans, P. *Acta Crystallogr. Sect. D: Biol. Crystallogr.* **2006**, *62*, 72–82. (b) Evans, P. R.; Murshudov, G. N. *Acta Crystallogr. Sect. D: Biol. Crystallogr.* **2013**, *69*, 1204–1214.

<sup>8</sup> Adams, P. D.; Afonine, P. V.; Bunkoczi, G.; Chen, V. B.; Davis, I. W.; Echols, N.; Headd, J. J.; Hung, L. W.; Kapral, G. J.; Grosse-Kunstleve, R. W.; McCoy, A. J.; Moriarty, N. W.; Oeffner, R.; Read, R. J.; Richardson, D. C.; Richardson, J. S.; Terwilliger, T. C.; Zwart, P. H. *Acta Crystallogr. Sect. D: Biol. Crystallogr.* **2010**, *66*, 213–221.

<sup>9</sup> Larsen, N. A.; Heine, A.; de Prada, P.; Redwan, E.-R.; Yeates, T. O.; Landry, D. W.; Wilson, I. A. *Acta Crystallogr. Sect. D: Biol. Crystallogr.* **2002**, *58*, 2055–2059.

Initial positions for the iodine groups were determined using hybrid substructure search (HySS) in the PHENIX software suite.<sup>8,10</sup> Coordinates for the iodine groups determined by HySS were used with Autosol to generate the initial electron density map. Two macrocyclic  $\beta$ -sheet peptides **3** and two 2-methyl-2,4-pentanediol molecules were found in the asymmetric unit. Iterative rounds of refinement and model building were done with phenix.refine and Coot,<sup>11</sup> respectively. Each structure during the iterative model building was refined with riding hydrogens, TLS parameters, anisotropic  $B$ -factors for 4-iodophenylalanine residues, and with the twin law  $(-h, -k, l)$ . Statistics for the final refinement of macrocyclic  $\beta$ -sheet peptides **3** were  $R_{\text{work}} = 17.94\%$  and  $R_{\text{free}} = 21.97\%$ . The crystal structure was deposited to the Protein Data Bank (PDB) with PDB code 4Q8D.

PyMOL was used to generate images from the crystallographic data. A  $\beta$ -strand of three glycine residues (G3) was used to replace Hao in generating a cartoon of the  $A\beta_{15-23}$  hybrid strand, QKLV-Hao-ED. Specifically, the pdb coordinates for the unnatural amino acid Hao were used to generate triglycine segments.

---

<sup>10</sup> Grosse-Kunstleve, R. W.; Adams, P. D. *Acta Crystallogr. Sect. D: Biol. Crystallogr.* **2003**, *59*, 1966–1973.

<sup>11</sup> Emsley, P.; Lohkamp, B.; Scott, W. G.; Cowtan, K. *Acta Crystallogr. Sect. D: Biol. Crystallogr.* **2010**, *66*, 486–501.

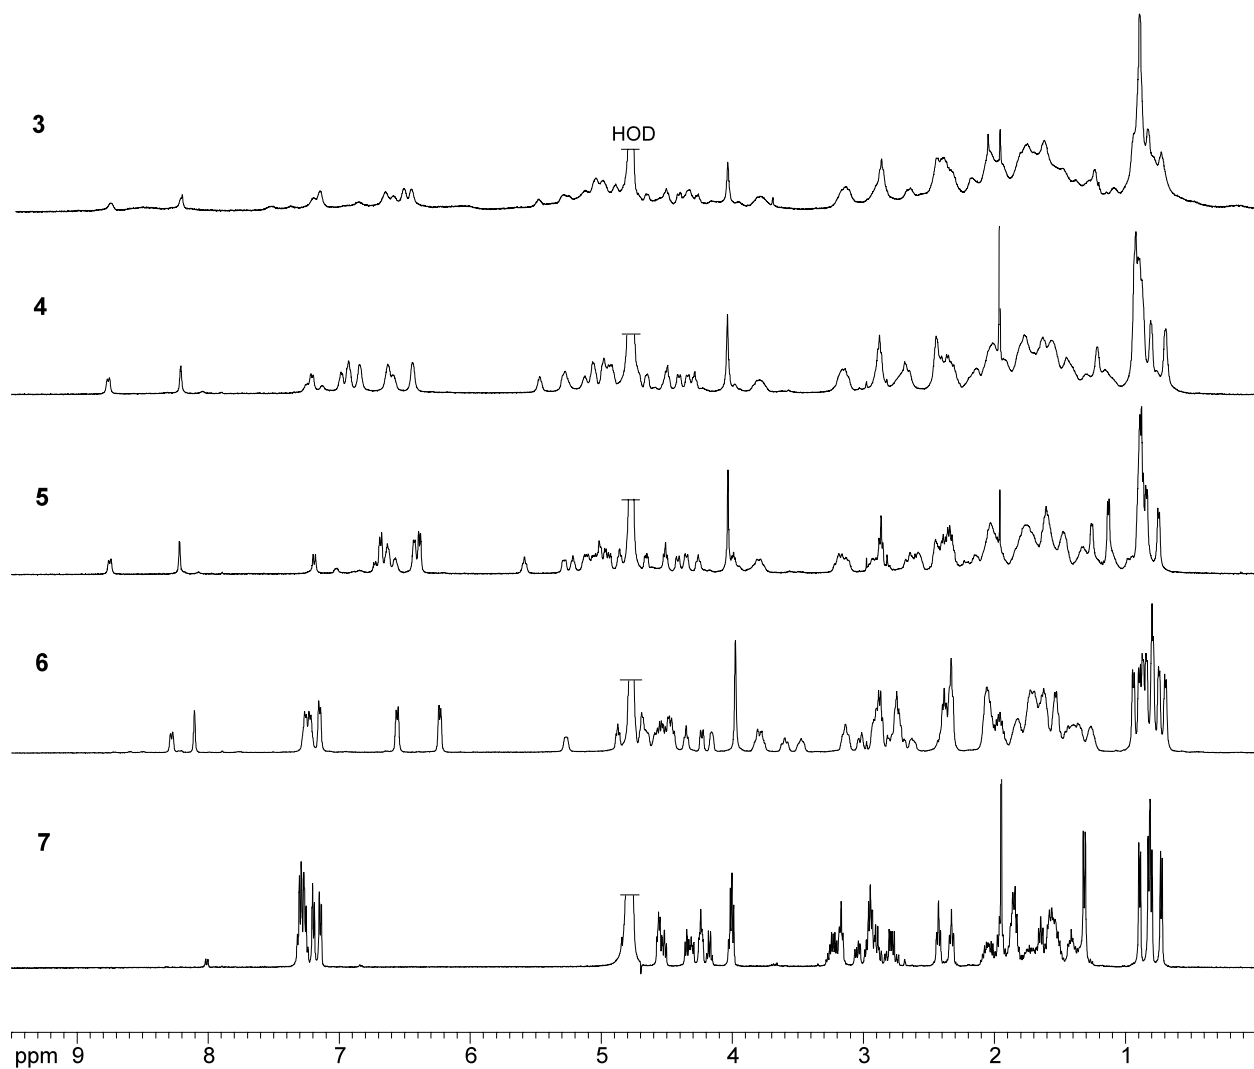

**Figure S1.**  $^1\text{H}$  NMR spectra of macrocyclic  $\beta$ -sheet peptides at 2.0 mM at 298 K in  $\text{D}_2\text{O}$  at 500 MHz: **3** (tetramer predominates), **4** (tetramer predominates), **5** (tetramer predominates), and **6** (monomer predominates). The  $^1\text{H}$  NMR spectrum of linear peptide **7** (1.2 mM at 298 K in  $\text{D}_2\text{O}$  at 500 MHz) is provided for comparison, to show the spectrum of an unstructured QKLVFFAED peptide.<sup>1</sup>

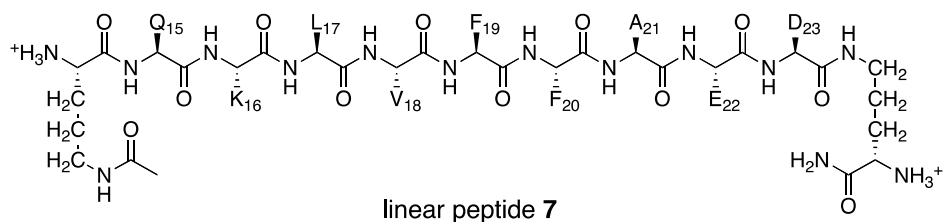

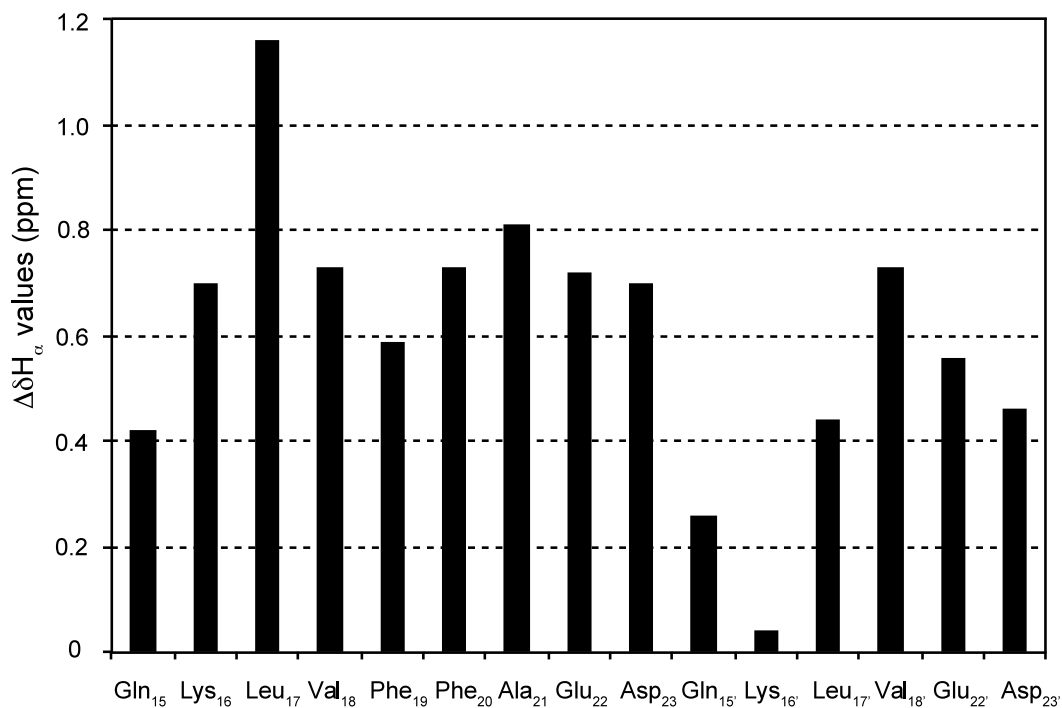

**Figure S2.** Downfield shifting of the  $^1\text{H}$  NMR  $\alpha$ -proton resonances of the tetramer of macrocyclic  $\beta$ -sheet peptide **4** relative to linear peptide **7**<sup>1</sup>. The  $^1\text{H}$  NMR spectrum of **4** was recorded at 2.0 mM in  $\text{D}_2\text{O}$  at 500 MHz and 298 K. Assignments of Lys<sub>16</sub> vs. Lys<sub>16'</sub>, Glu<sub>23</sub> vs. Glu<sub>23'</sub>, and Gln<sub>15</sub> vs. Gln<sub>15'</sub> are arbitrary.

**Table S1. Magnetic Anisotropies of the  $\delta$ -Protons of the  $\delta$ -Linked Ornithine Turn Units of Peptides 3–6 at 2.0 mM in  $\text{D}_2\text{O}$  at 298 K and 500 MHz**

| peptide               | $\delta^{\text{Orn}}_1^{\text{c}}$ | $\delta^{\text{Orn}}_2^{\text{c}}$ | folding                  |
|-----------------------|------------------------------------|------------------------------------|--------------------------|
|                       | $\Delta\delta$ (ppm)               | $\Delta\delta$ (ppm)               |                          |
| <b>3</b> <sup>a</sup> | 0.63                               | 0.69                               | folded tetramer          |
| <b>4</b> <sup>a</sup> | 0.60                               | 0.69                               | folded tetramer          |
| <b>5</b> <sup>a</sup> | 0.62                               | 0.70                               | folded tetramer          |
| <b>6</b> <sup>b</sup> | 0.46                               | 0.34                               | partially folded monomer |

<sup>a</sup>Oligomer at 2.0 mM. <sup>b</sup> Monomer at 2.0 mM. <sup>c</sup> Assignment of  $\delta^{\text{Orn}}_1$  vs.  $\delta^{\text{Orn}}_2$  is arbitrary.

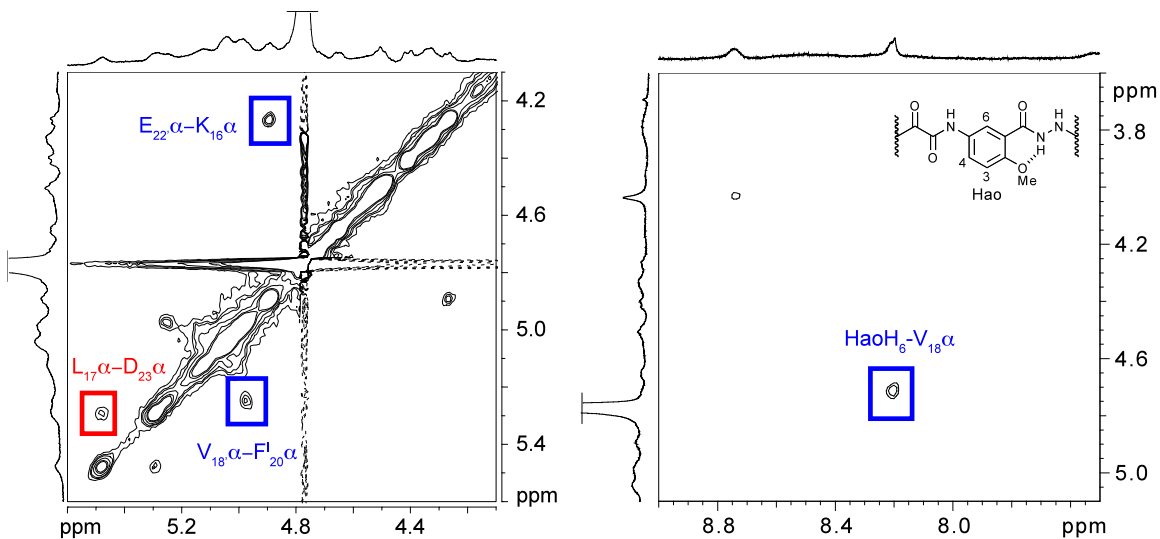

**Figure S3.** Selected expansions of the NOESY spectrum of macrocyclic  $\beta$ -sheet peptide **3** at 2.0 mM in  $D_2O$  at 500 MHz and 298 K. Key intermolecular interstrand NOEs associated with dimerization are highlighted in red; key intramolecular interstrand NOEs associated with folding are highlighted in blue.

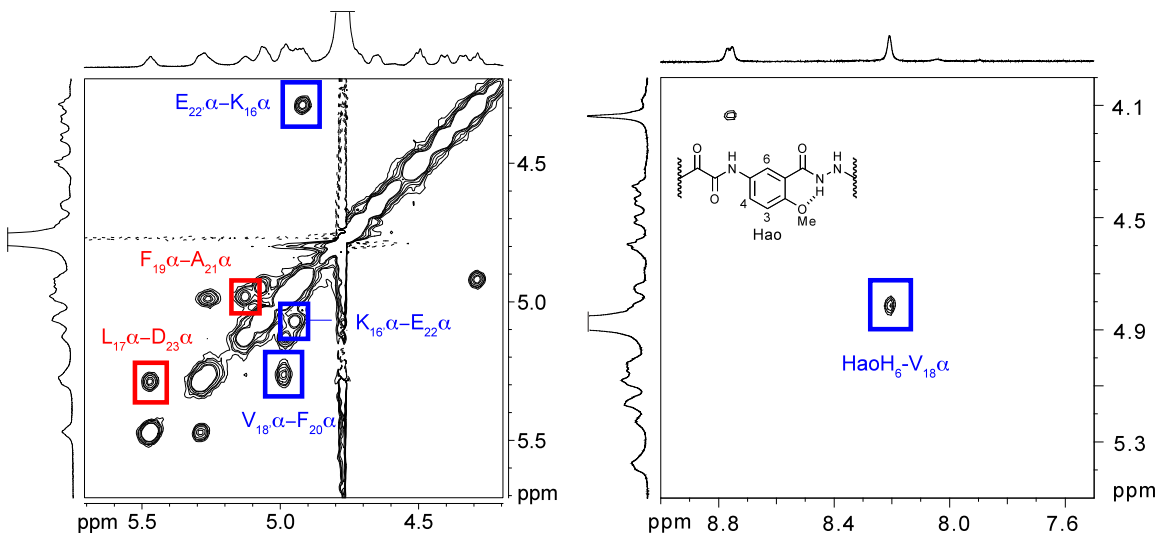

**Figure S4.** Selected expansions of the NOESY spectrum of macrocyclic  $\beta$ -sheet peptide **4** at 2.0 mM in  $D_2O$  at 500 MHz and 298 K. Key intermolecular interstrand NOEs associated with dimerization are highlighted in red; key intramolecular interstrand NOEs associated with folding are highlighted in blue.



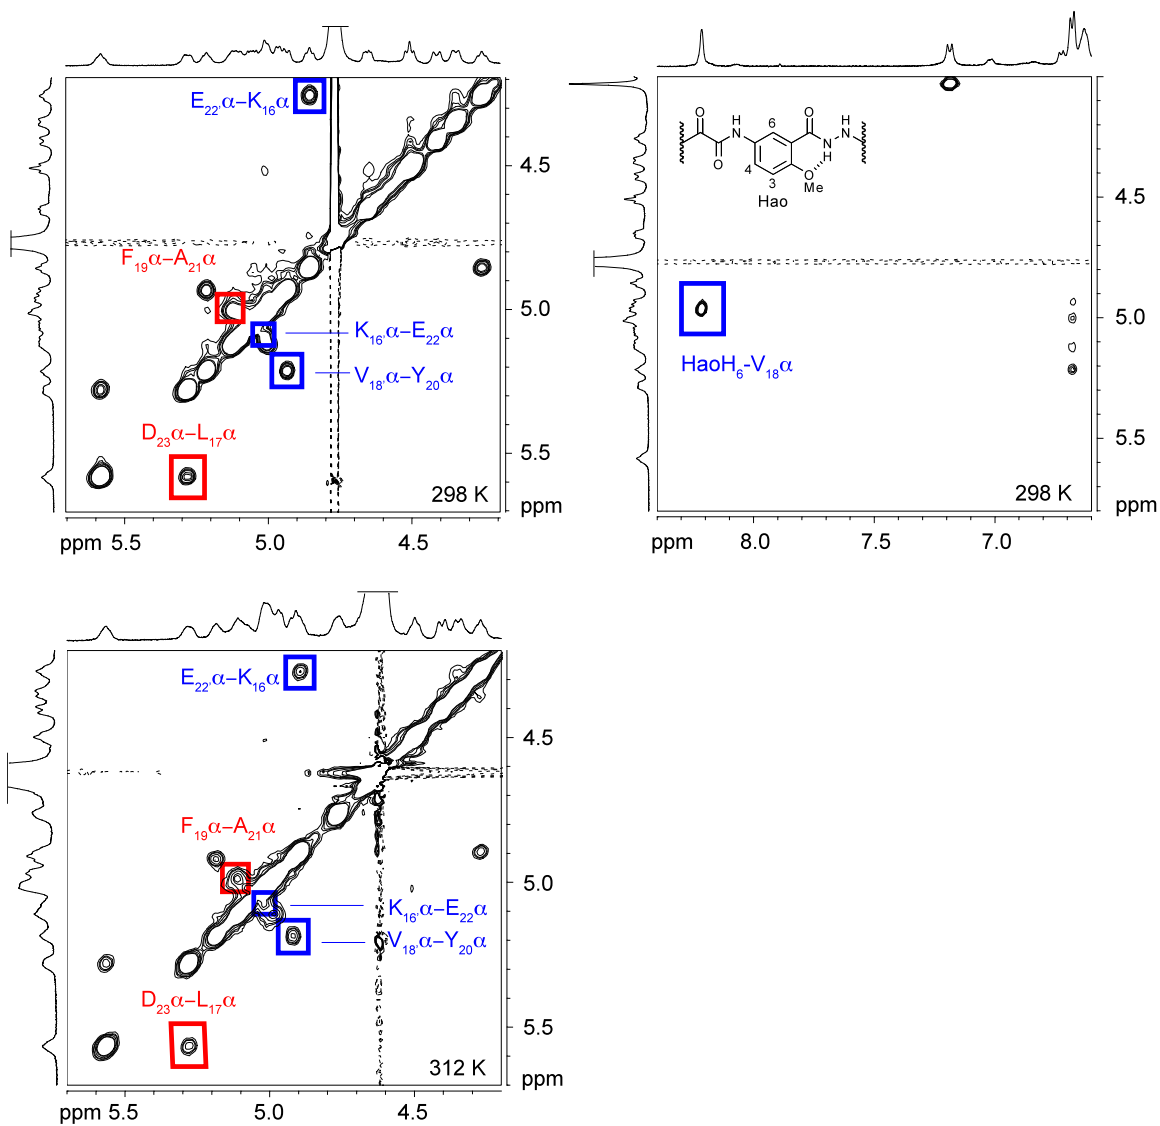

**Figure S5.** Selected expansions of the NOESY spectrum of macrocyclic  $\beta$ -sheet peptide **5** at 2.0 mM in  $D_2O$  at 500 MHz and at 298 K and 312 K. Key intermolecular interstrand NOEs associated with dimerization are highlighted in red; key intramolecular interstrand NOEs associated with folding are highlighted in blue.

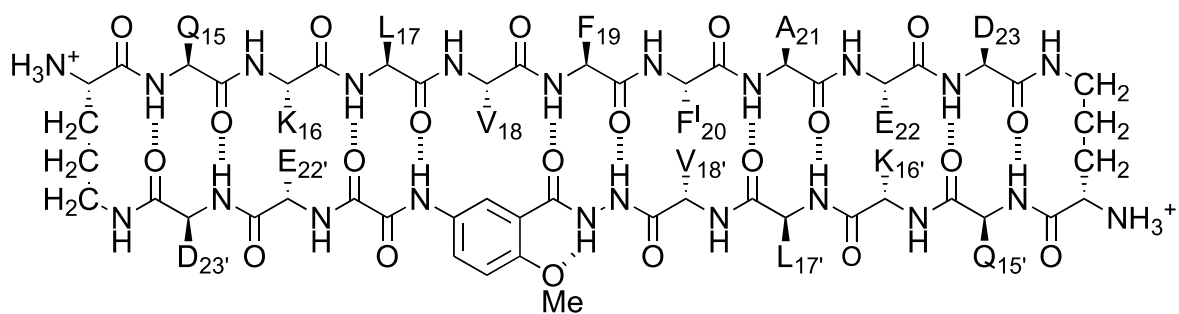

macrocyclic  $\beta$ -sheet peptide **3** (as the TFA salt)

molecular weight calculated for  $C_{103}H_{155}IN_{26}O_{31} \cdot 4CF_3CO_2H$  (TFA salt of **3**): 2836.49

molecular weight calculated for  $C_{103}H_{155}IN_{26}O_{31}$  (free base of **3**): 2380.39

exact mass calculated for  $C_{103}H_{155}IN_{26}O_{31}$  (free base of **3**): 2379.04

### Analytical RP-HPLC of macrocyclic $\beta$ -sheet **3**

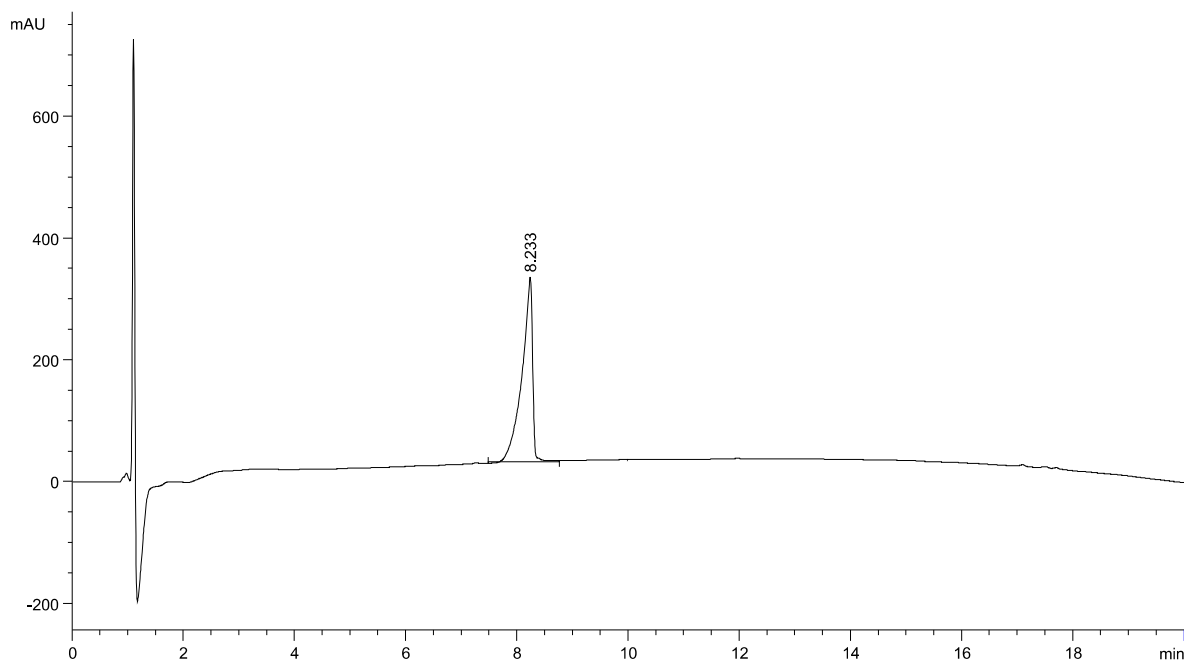

Signal 1: VWD1 A, Wavelength=214 nm

| Peak # | RetTime [min] | Type | Width [min] | Area mAU *s | Height [mAU] | Area %   |
|--------|---------------|------|-------------|-------------|--------------|----------|
| 1      | 8.233         | MM   | 0.2195      | 3995.70361  | 303.33344    | 100.0000 |

Totals : 3995.70361 303.33344

# Macrocyclic $\beta$ -sheet peptide 3

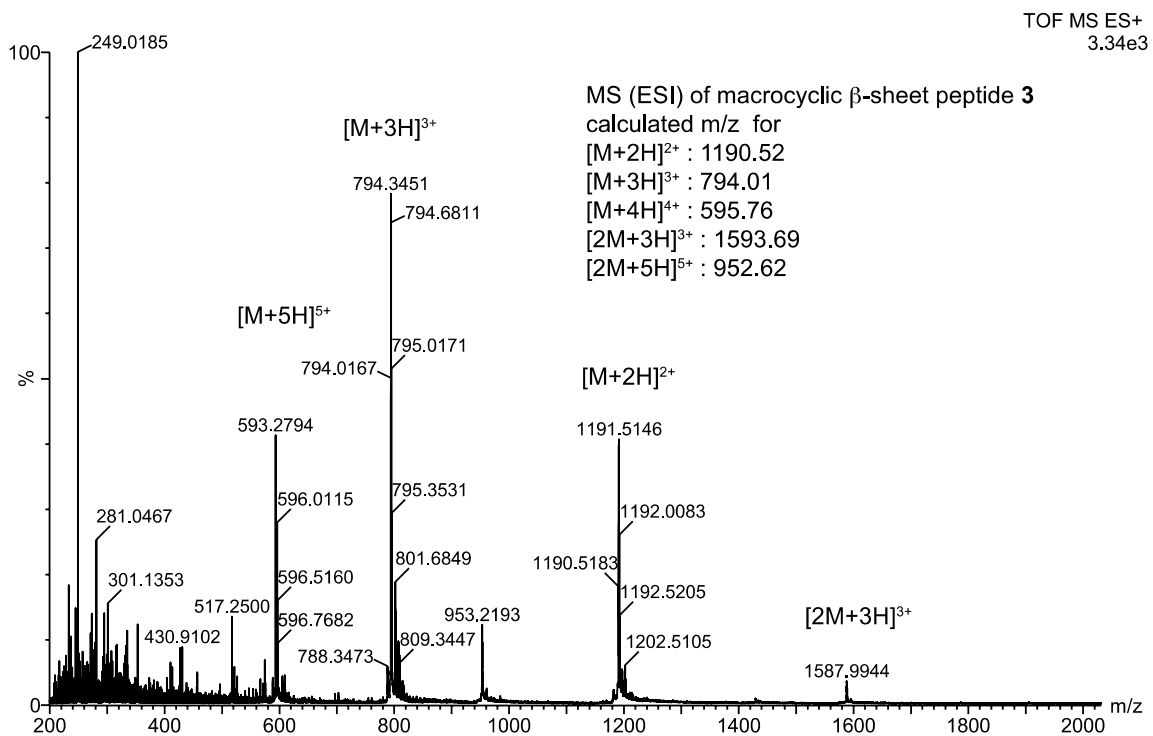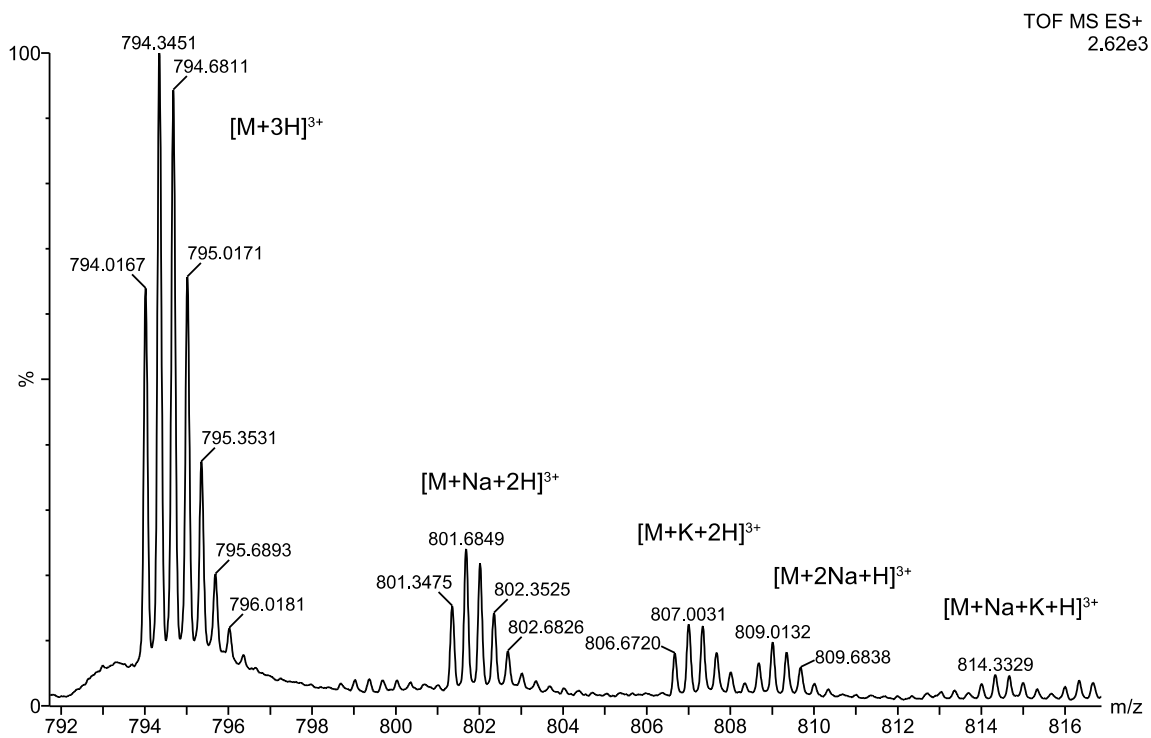

# Macrocyclic $\beta$ -sheet peptide **3**

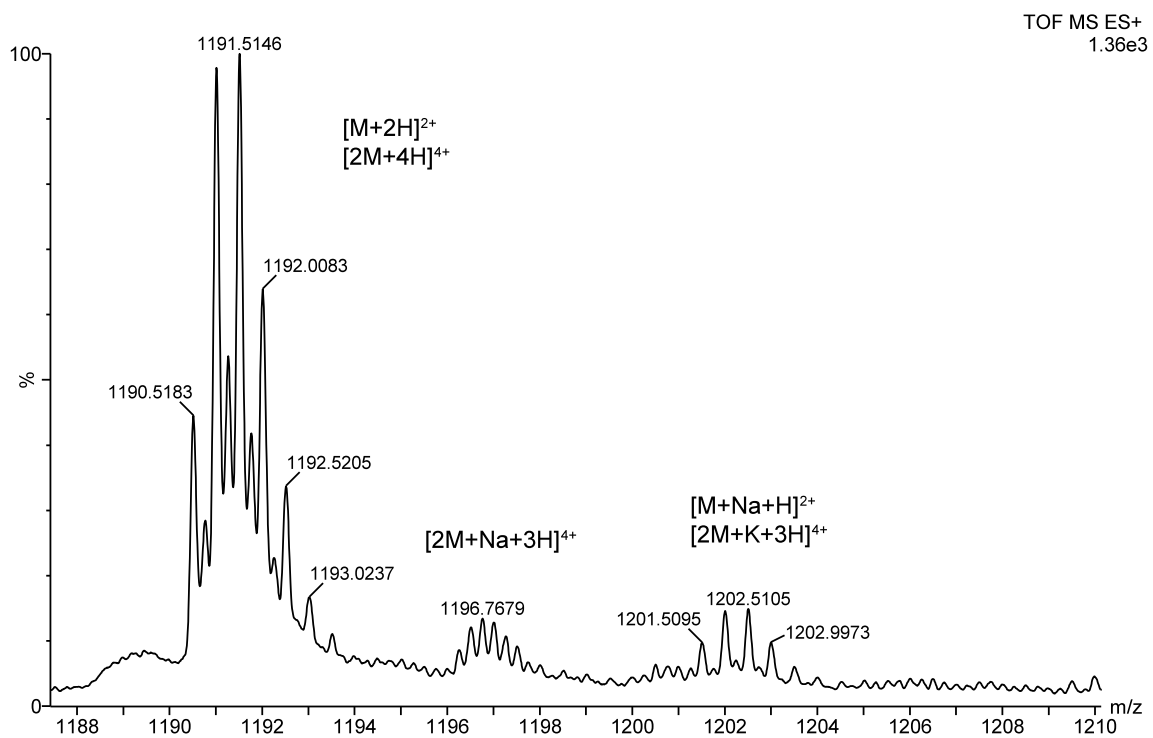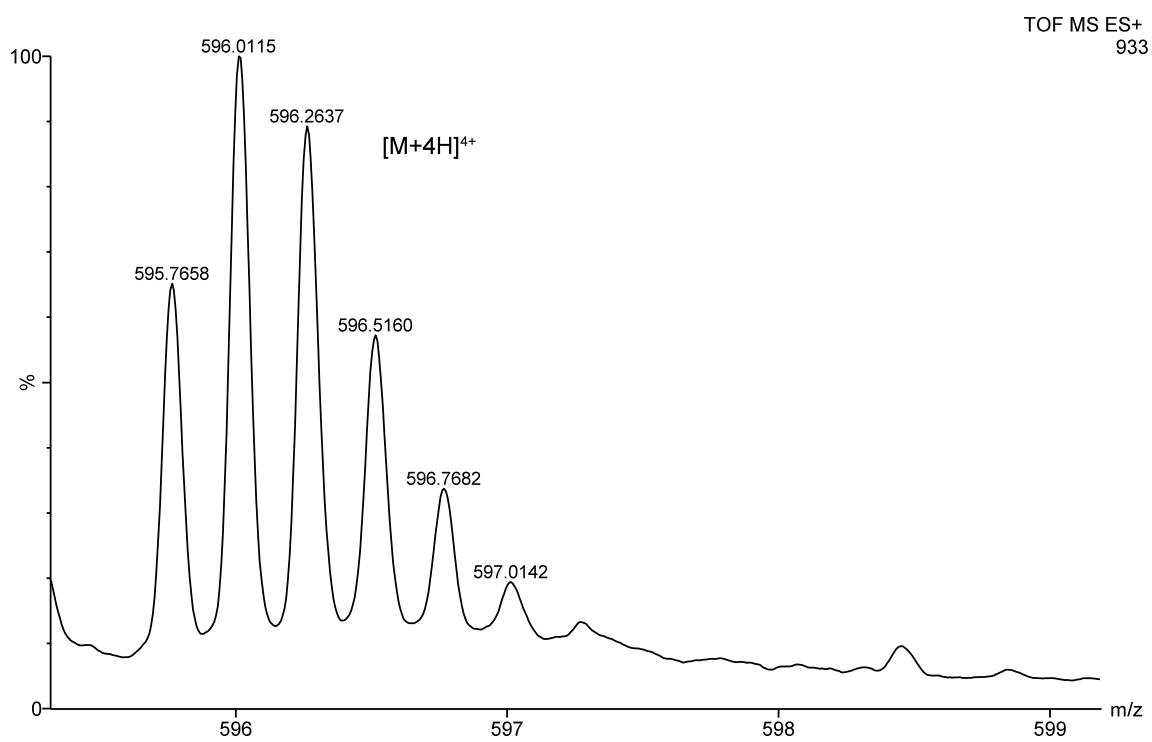

# Macrocyclic $\beta$ -sheet peptide **3**

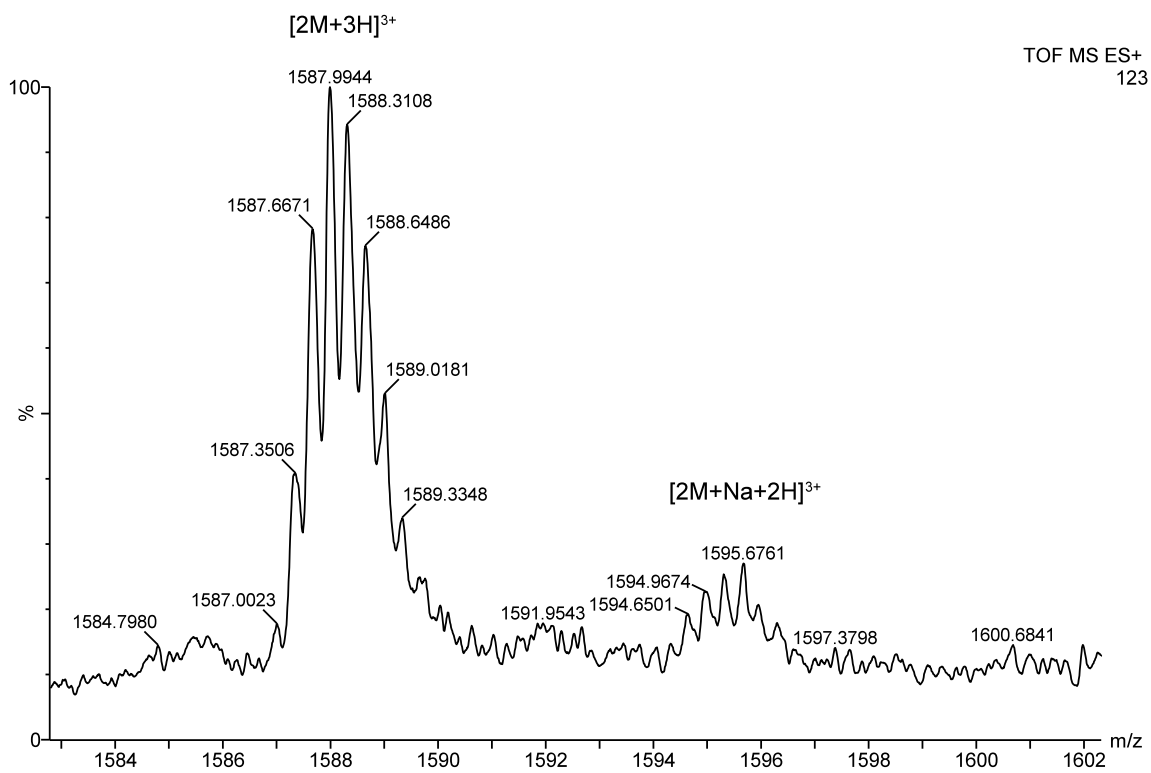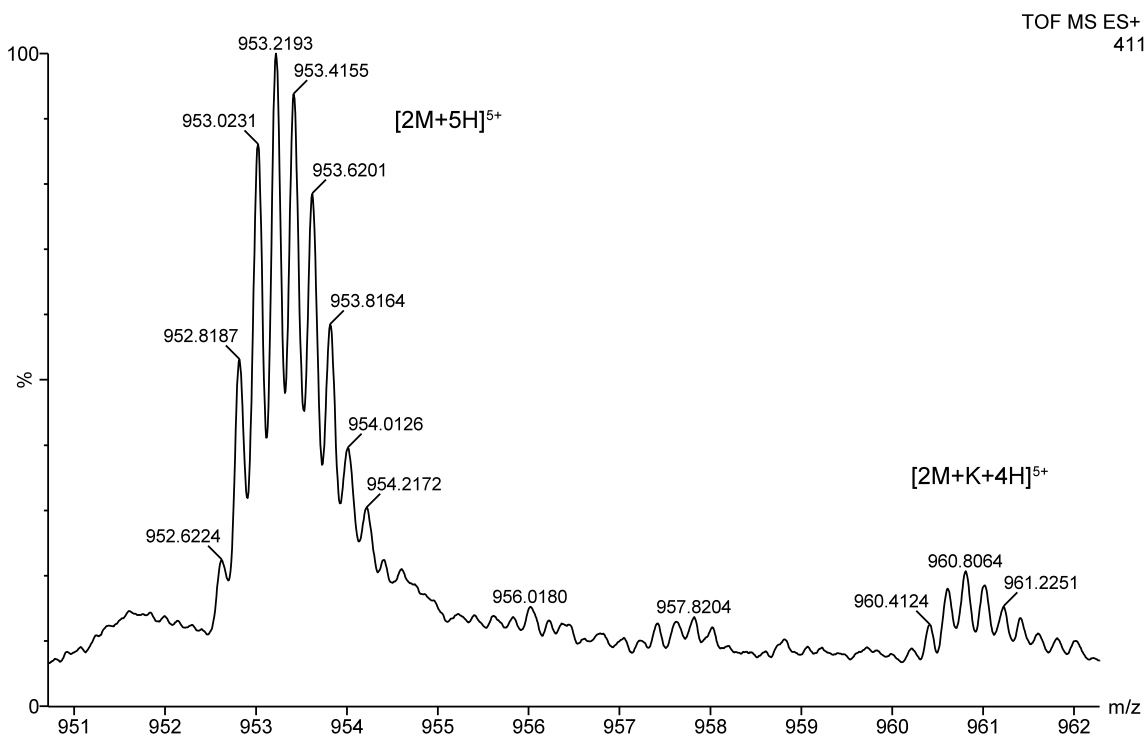

1D  $^1\text{H}$  NMR spectrum of macrocyclic  $\beta$ -sheet **3**  
2 mM in  $\text{D}_2\text{O}$ , 500 MHz, 298 K  
tetramer predominates

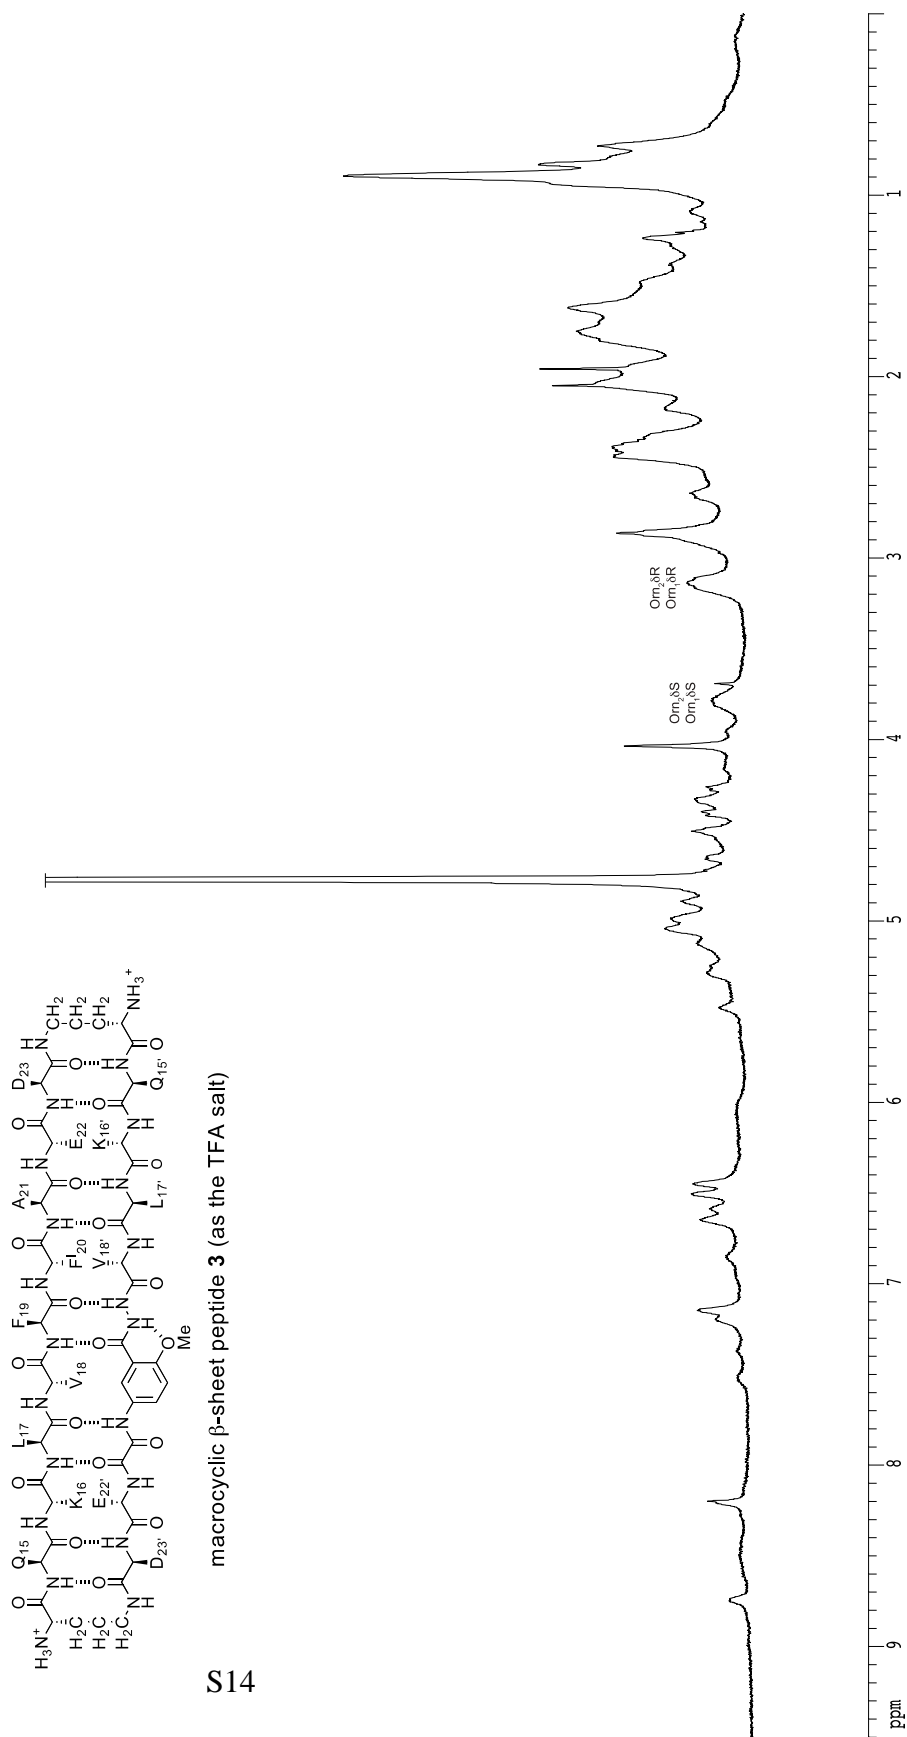

2D TOCSY spectrum of macrocyclic  $\beta$ -sheet **3**  
2 mM in D<sub>2</sub>O, 500 MHz, 298 K  
150-ms spin-locking mixing time  
tetramer predominates

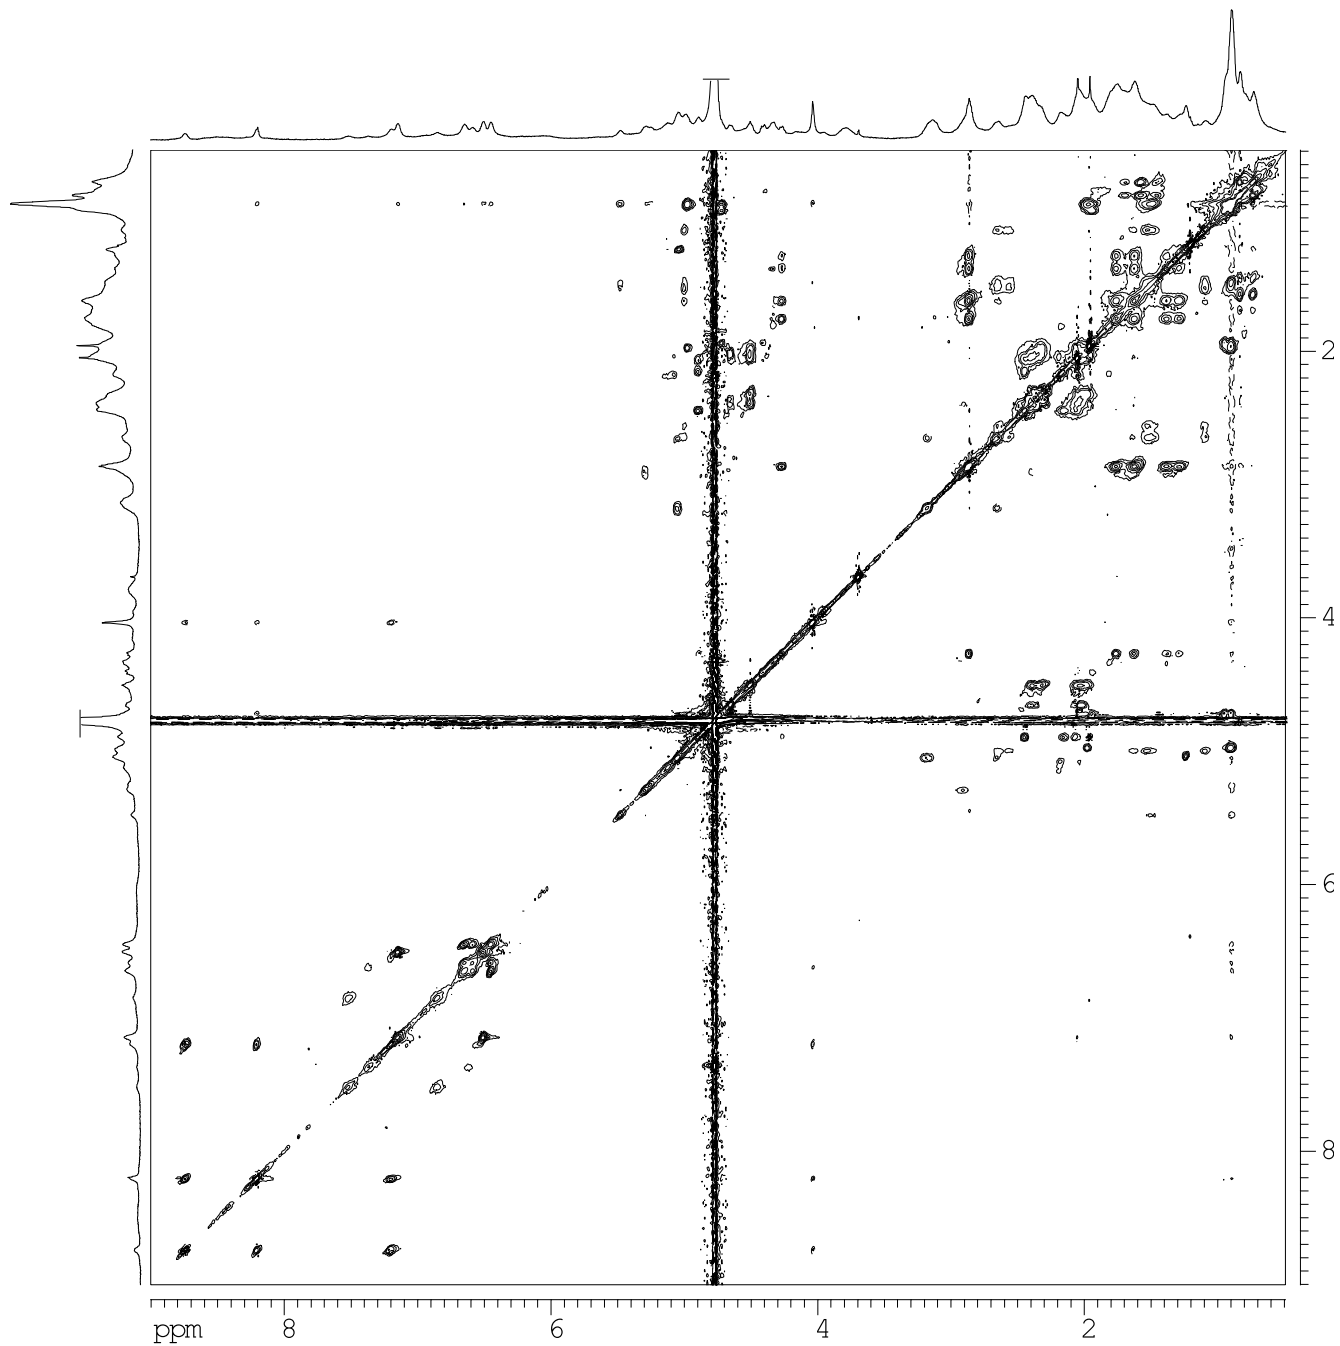

2D NOESY spectrum of macrocyclic  $\beta$ -sheet **3**  
2 mM in D<sub>2</sub>O, 500 MHz, 298 K  
200-ms spin-locking mixing time  
tetramer predominates

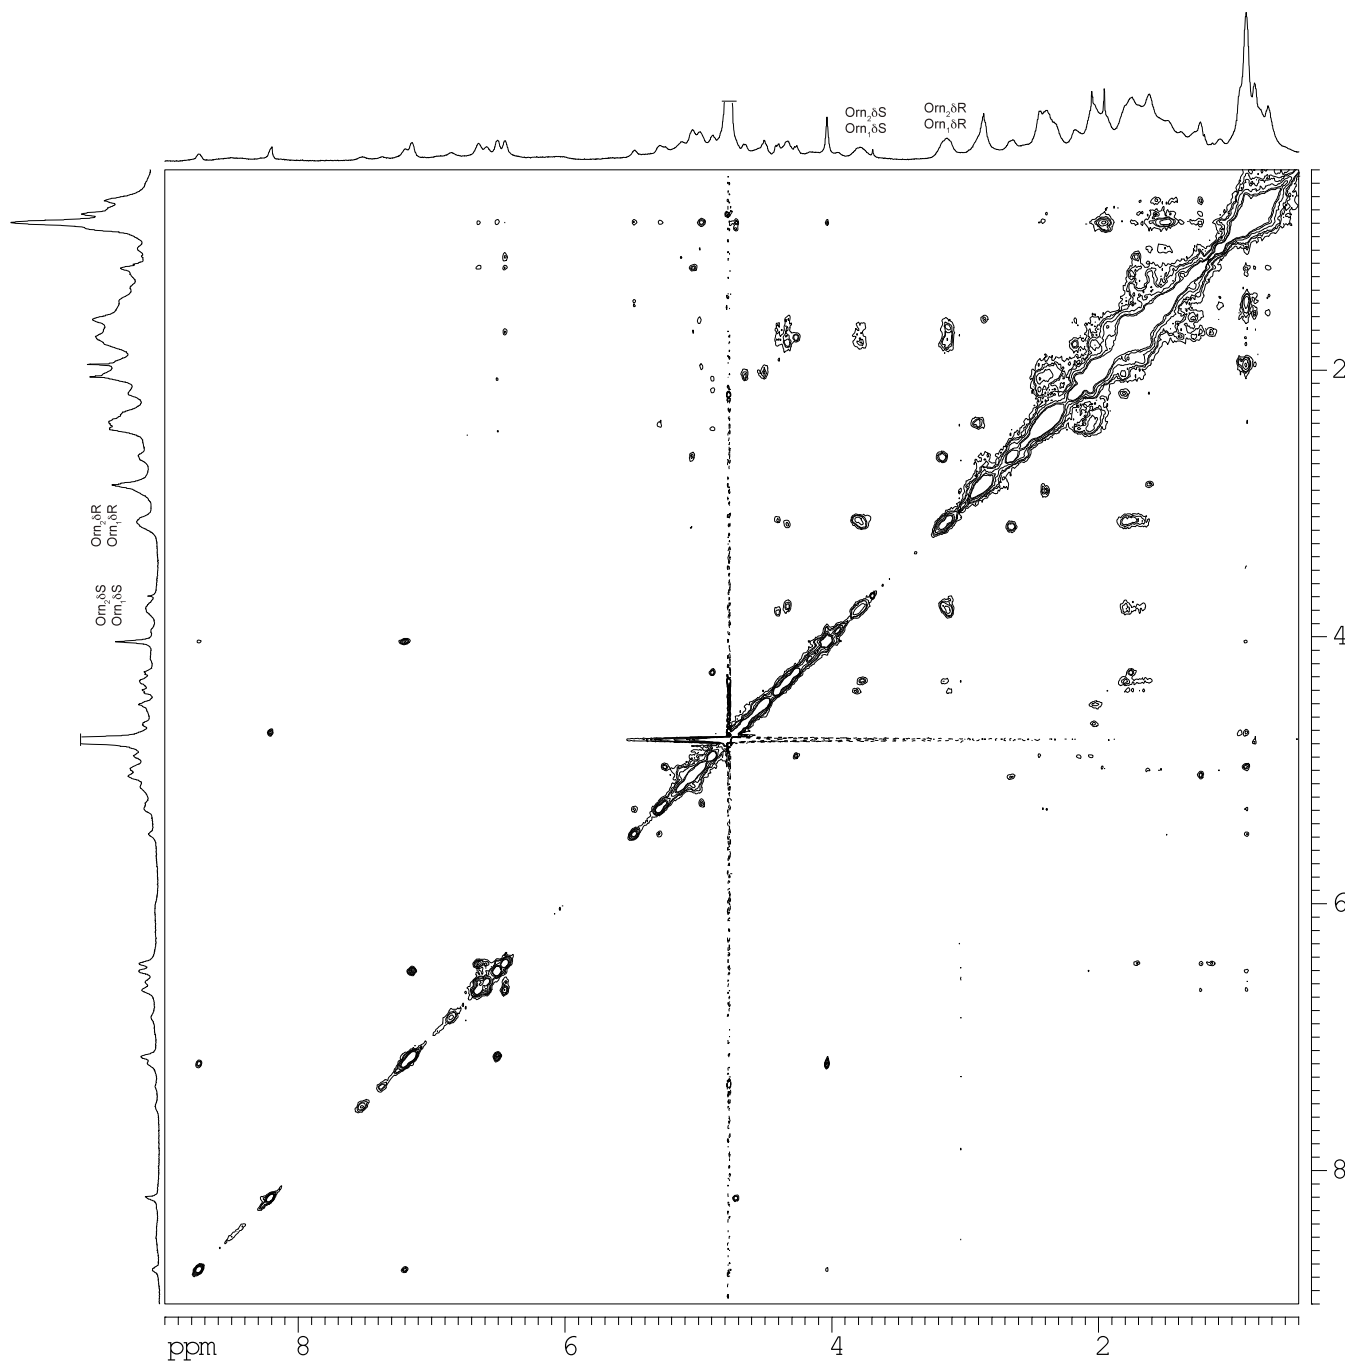



2D DOSY spectrum of macrocyclic  $\beta$ -sheet **3**  
2 mM in D<sub>2</sub>O, 600 MHz, 298 K  
tetramer predominates

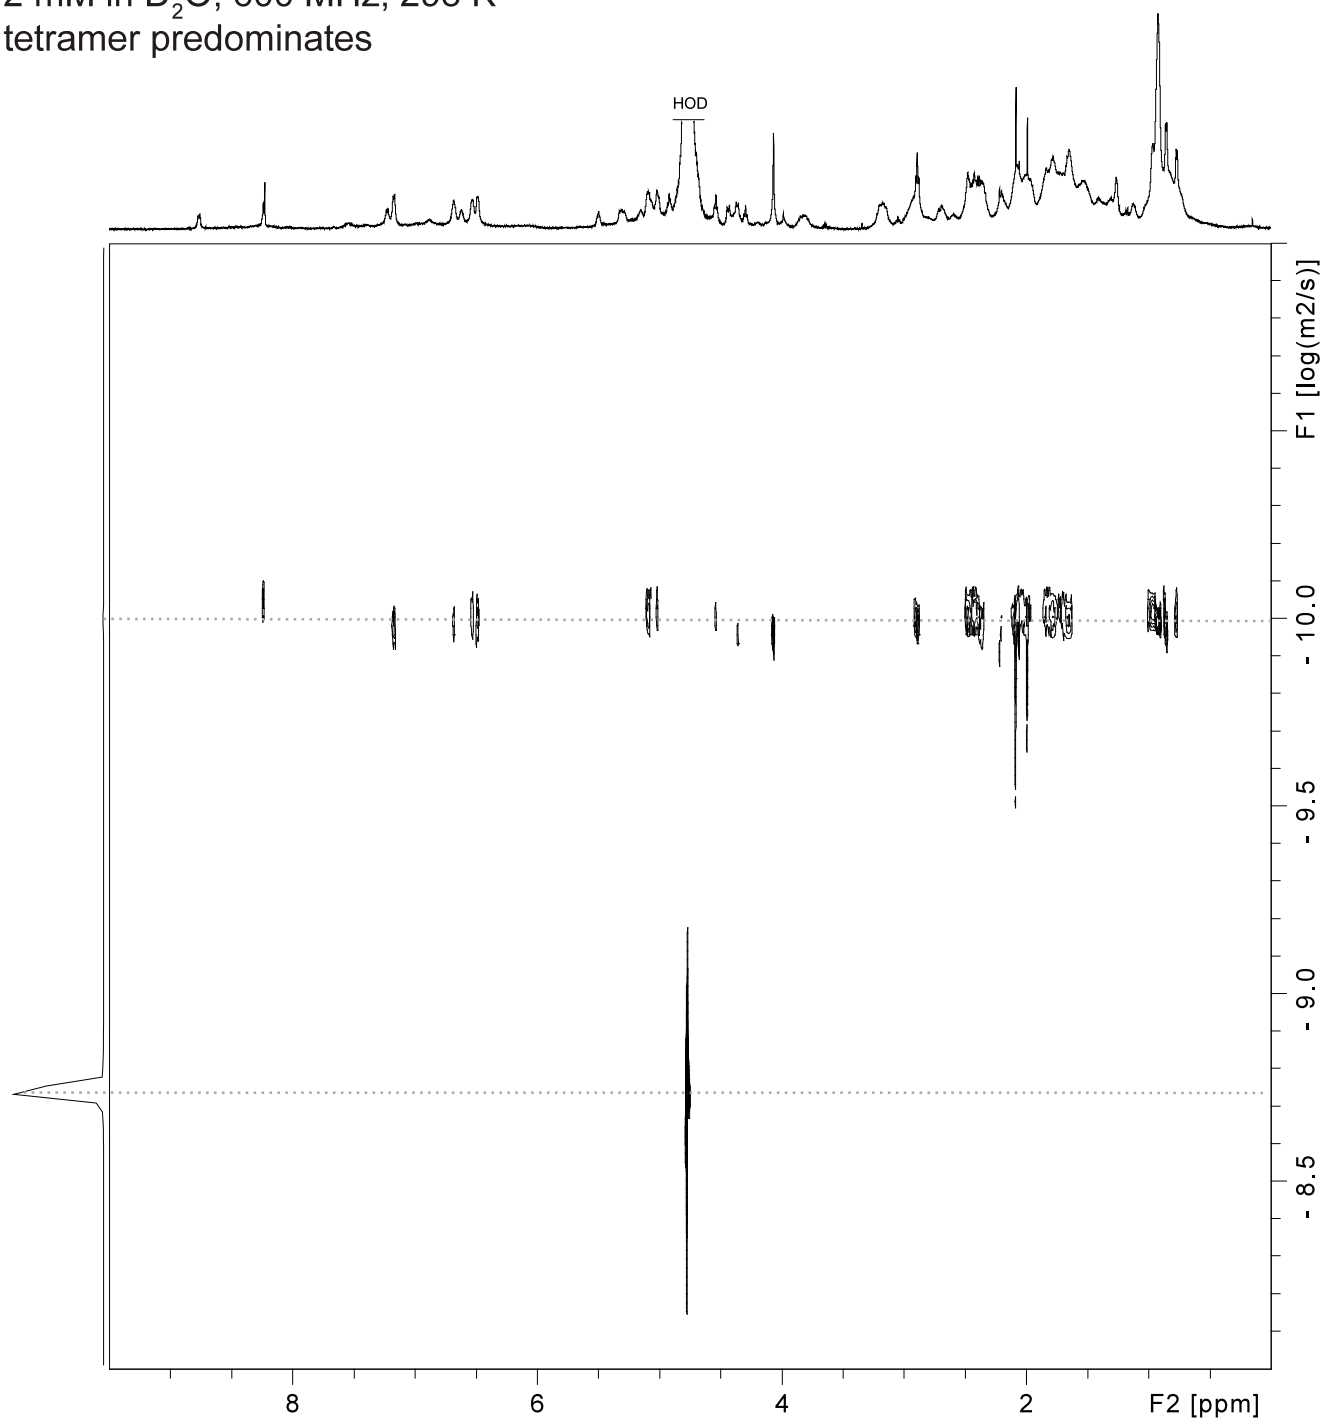

Calculation for peptide **3** at 2.0 mM

$$DC_{\text{HOD}} = 19.0 \times 10^{-10} \text{ m}^2/\text{s}^{\text{a}}$$
$$\log DC_{\text{HOD}} = -8.721$$

For peptide **3** tetramer,  $\log DC \text{ (m}^2/\text{s)} = -9.99(4)$ ,  $DC = 10^{-9.994} \text{ m}^2/\text{s} = 10.1 \times 10^{-11} \text{ m}^2/\text{s} = 10.1 \times 10^{-7} \text{ cm}^2/\text{s}$

<sup>a</sup> Longworth, L. G. J. Phys. Chem. 1960, 64, 1914–1917.

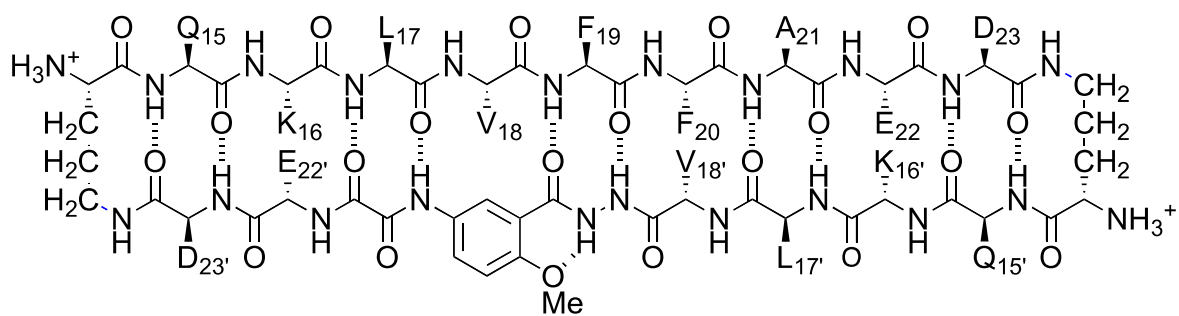

macrocyclic  $\beta$ -sheet peptide **4** (as the TFA salt)

molecular weight calculated for  $C_{103}H_{156}N_{26}O_{31} \cdot 4CF_3CO_2H$  (TFA salt of **4**): 2710.59

molecular weight calculated for  $C_{103}H_{156}N_{26}O_{31}$  (free base of **4**): 2254.50

exact mass calculated for  $C_{103}H_{156}N_{26}O_{31}$  (free base of **4**): 2253.14

## Analytical RP-HPLC of macrocyclic $\beta$ -peptide **4**

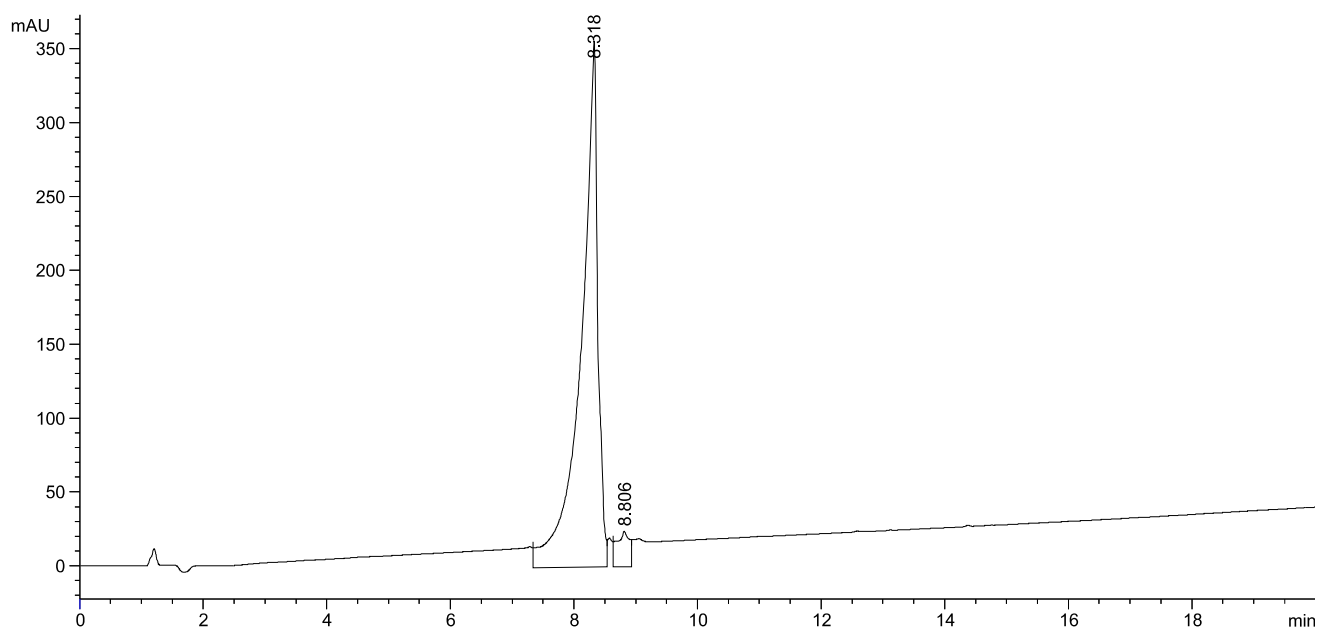

Signal 1: VWD1 A, Wavelength=254 nm

| Peak # | RetTime [min] | Type | Width [min] | Area mAU *s | Height [mAU] | Area %  |
|--------|---------------|------|-------------|-------------|--------------|---------|
| 1      | 8.318         | VV   | 0.2395      | 6692.11328  | 356.28714    | 95.1129 |
| 2      | 8.806         | VV   | 0.1819      | 343.85294   | 23.96618     | 4.8871  |

# Macrocyclic $\beta$ -sheet peptide 4

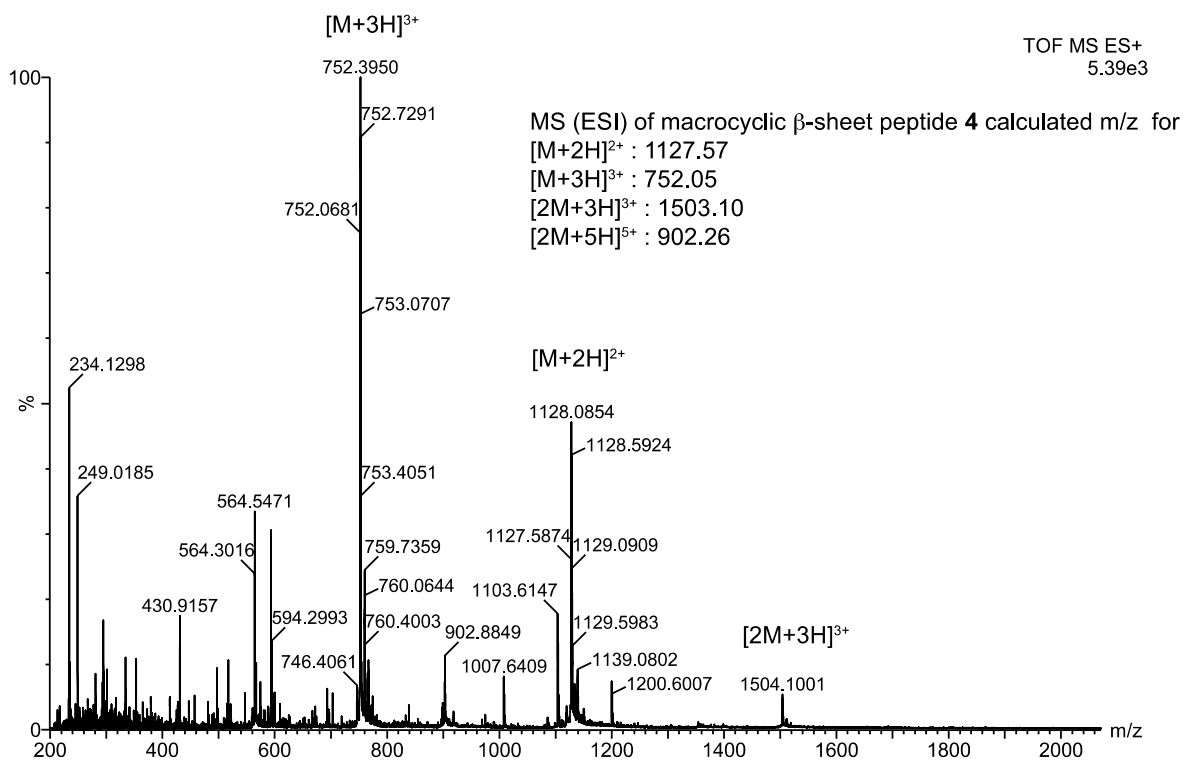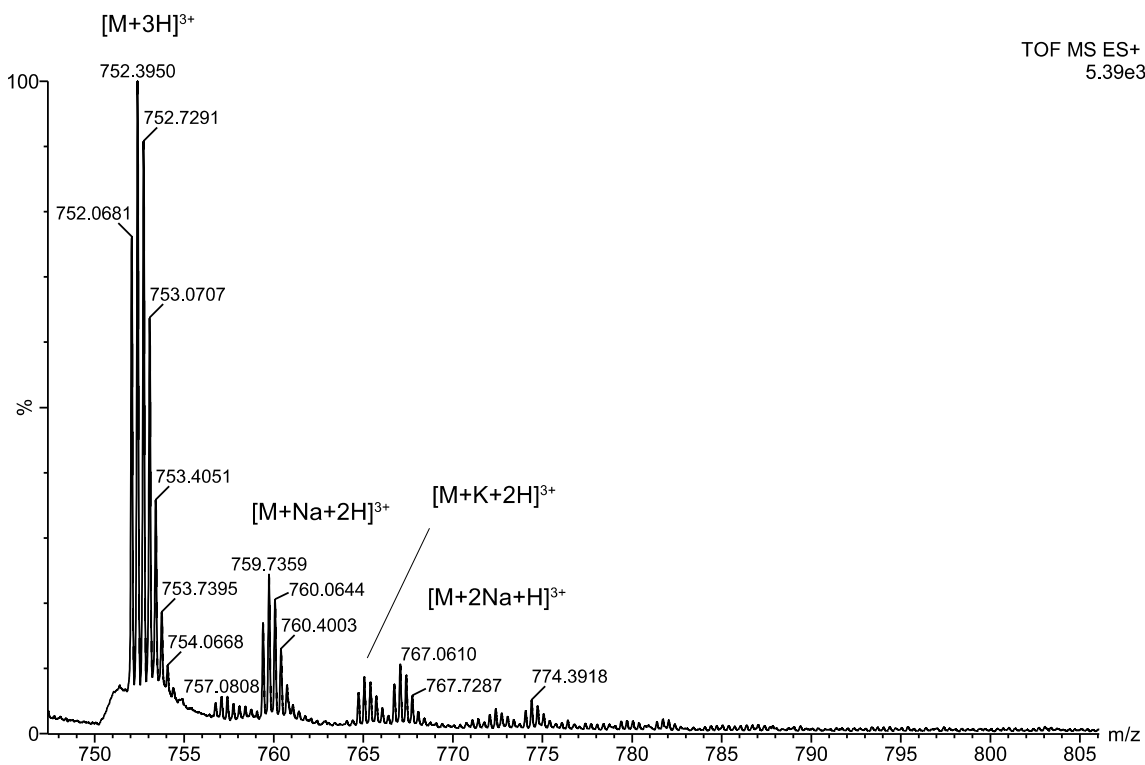

# Macrocyclic $\beta$ -sheet peptide 4

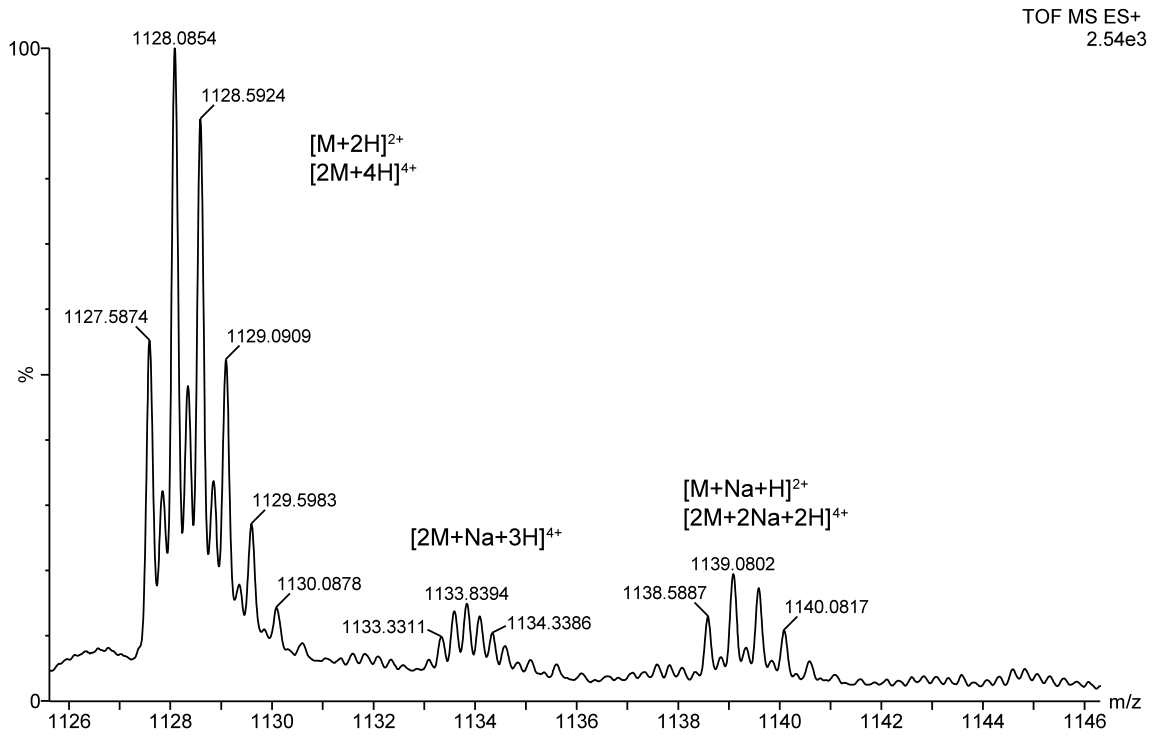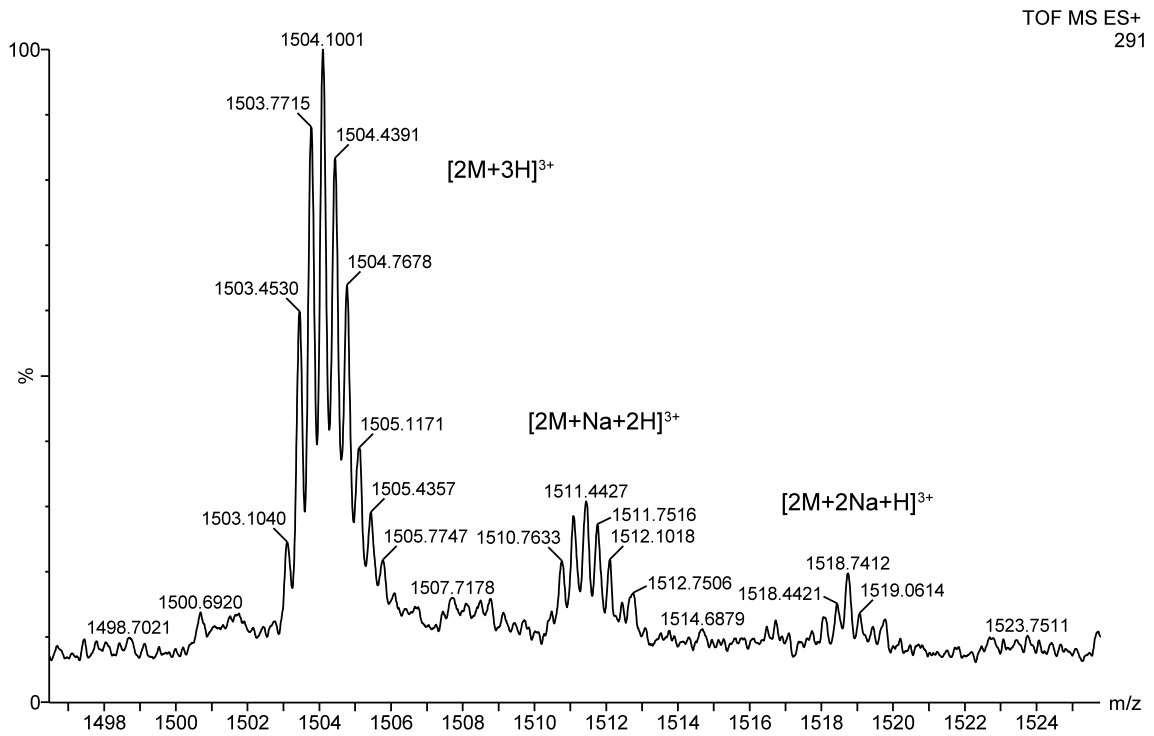

# Macrocyclic $\beta$ -sheet peptide **4**

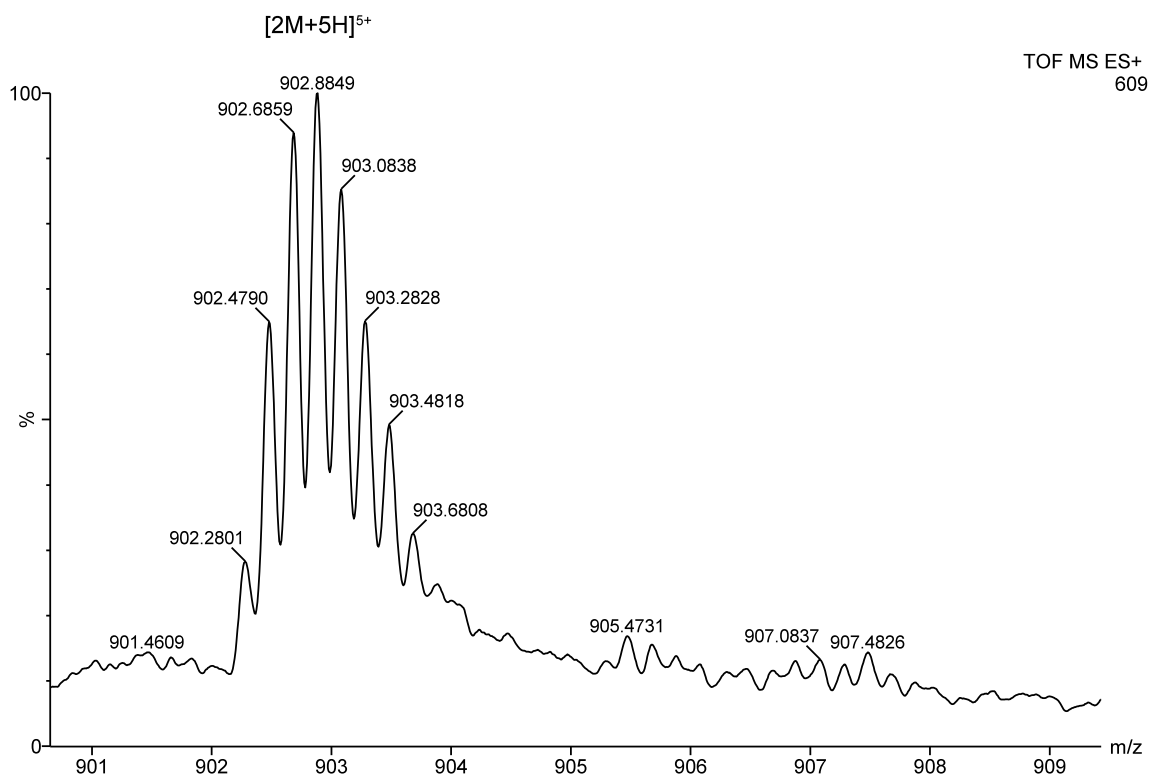

# 1D <sup>1</sup>H NMR spectrum of macrocyclic β-sheet 4

2 mM in D<sub>2</sub>O, 500 MHz, 298 K

tetramer predominates

Assignments of Lys<sub>16</sub> vs. Lys<sub>16'</sub>, Glu<sub>23</sub> vs. Glu<sub>23'</sub>, Gln<sub>15</sub> vs. Gln<sub>15'</sub>, and Orn<sub>1</sub> vs Orn<sub>2</sub> are arbitrary

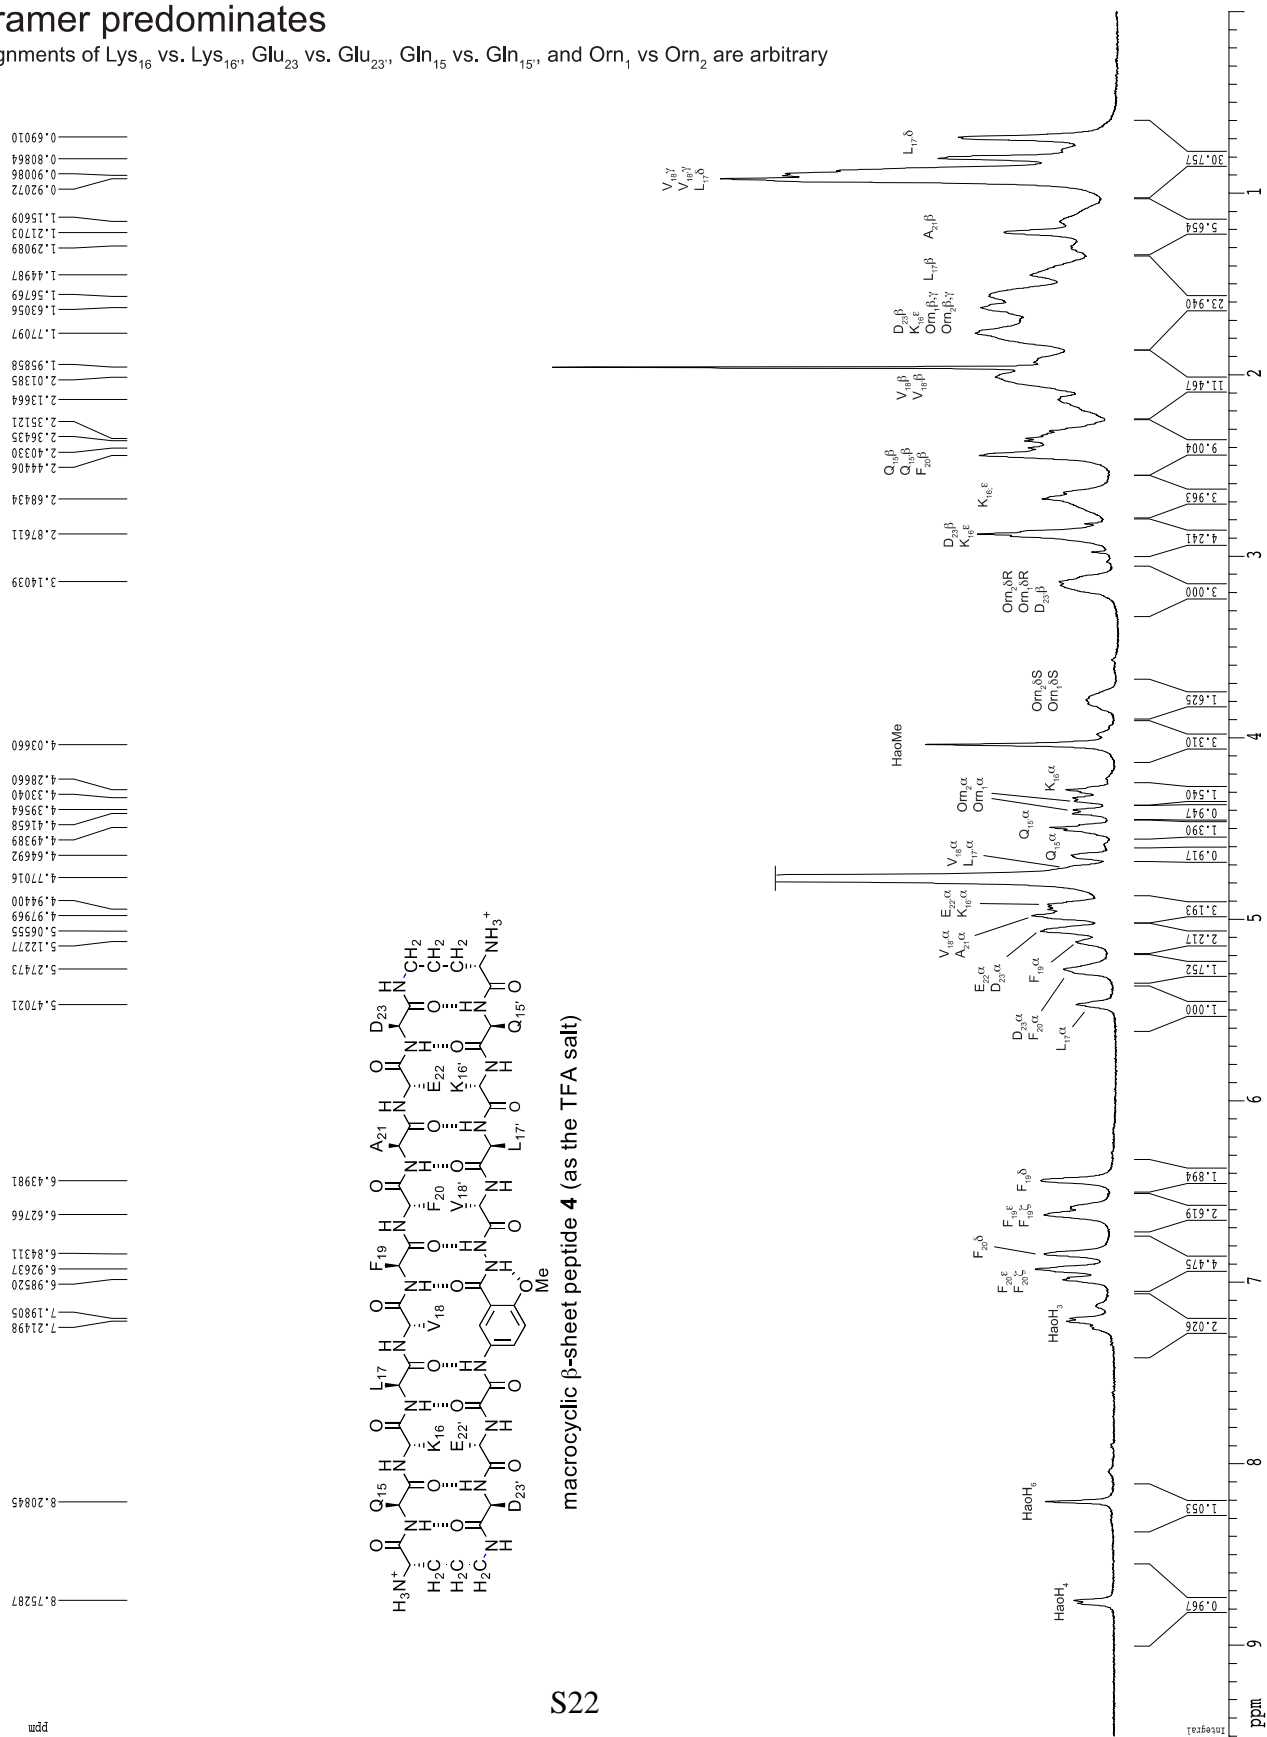







2D TOCSY spectrum of macrocyclic  $\beta$ -sheet **4**  
 2 mM in D<sub>2</sub>O, 500 MHz, 298 K, 150-ms spin-locking mixing time  
 tetramer predominates

Assignments of Lys<sub>16</sub> vs. Lys<sub>16'</sub>, Glu<sub>23</sub> vs. Glu<sub>23'</sub>, Gln<sub>15</sub> vs. Gln<sub>15'</sub>, and Orn<sub>1</sub> vs. Orn<sub>2</sub> are arbitrary

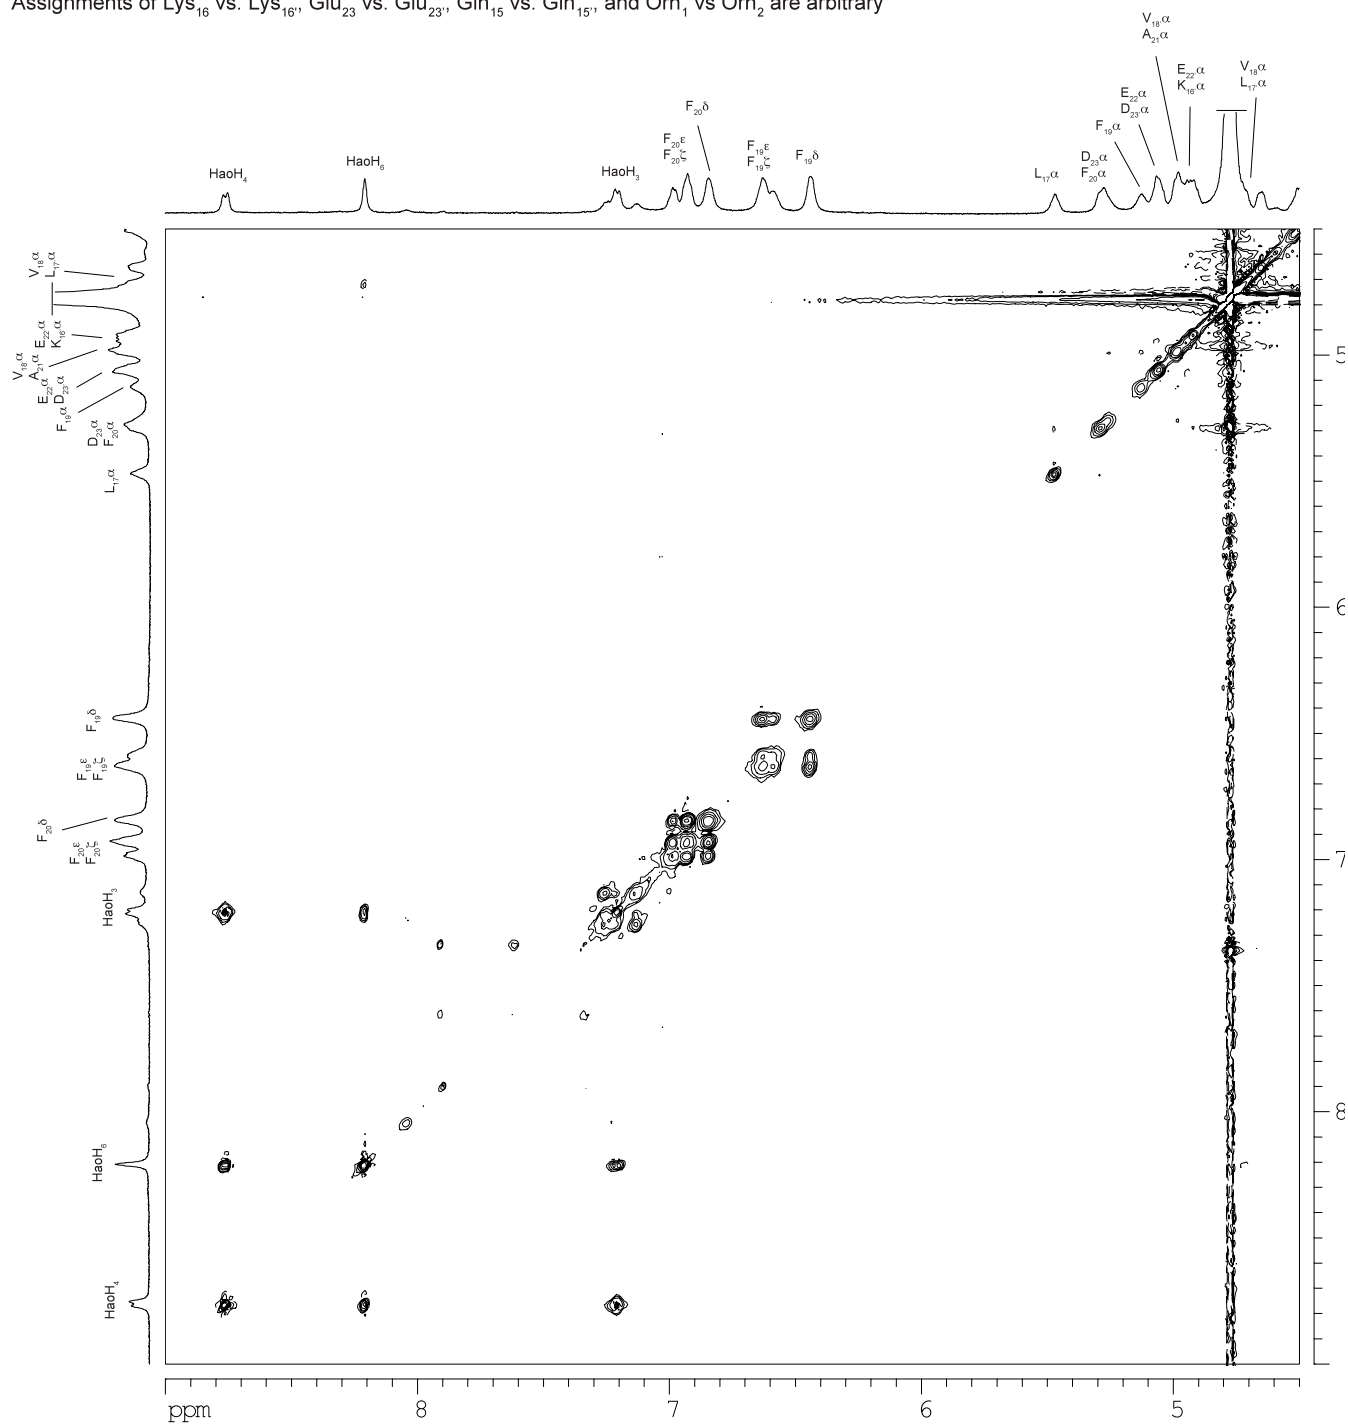

# 2D NOESY spectrum of macrocyclic $\beta$ -sheet 4

2 mM in D<sub>2</sub>O, 500 MHz, 298 K

200-ms spin-locking mixing time

tetramer predominates

Assignments of Lys<sub>16</sub> vs. Lys<sub>16'</sub>, Glu<sub>23</sub> vs. Glu<sub>23'</sub>,

Gln<sub>15</sub> vs. Gln<sub>15'</sub>, and Orn<sub>1</sub> vs Orn<sub>2</sub> are arbitrary

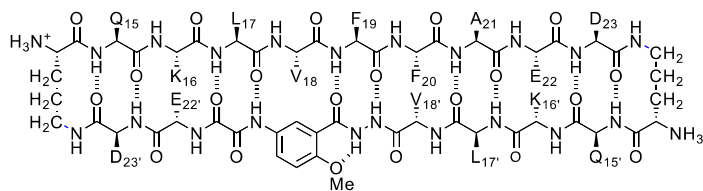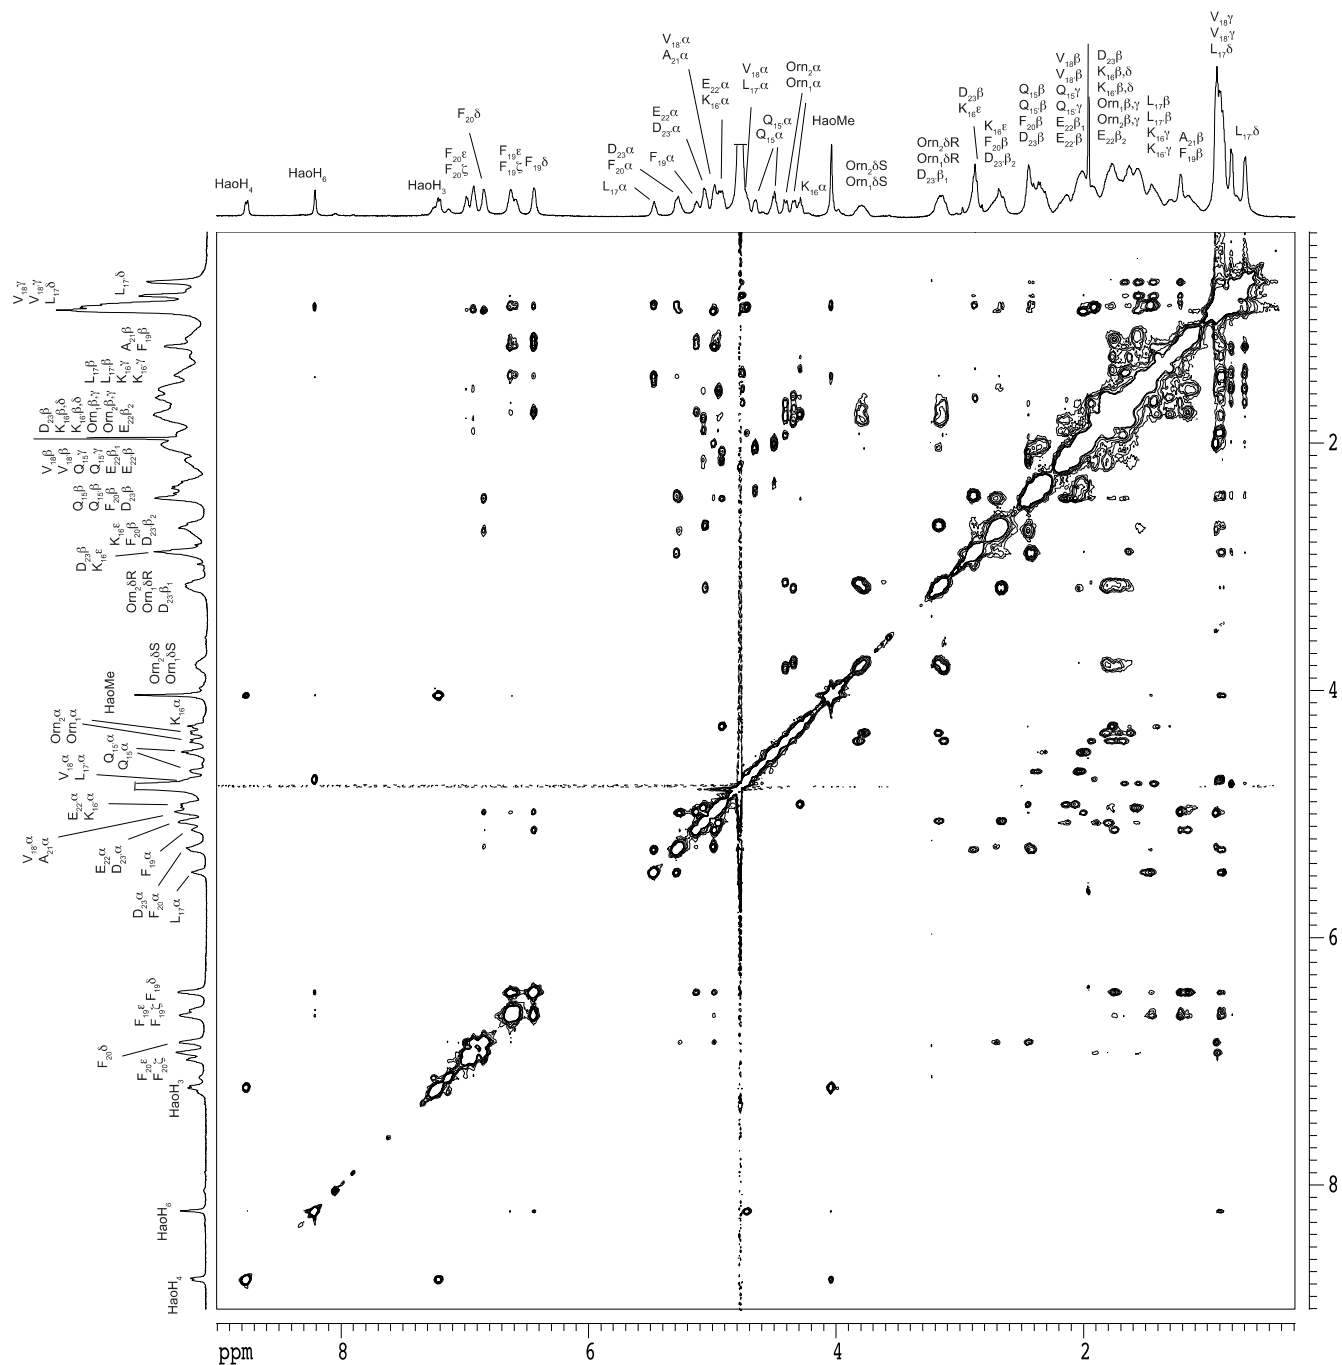



2D NOESY spectrum of macrocyclic  $\beta$ -sheet **4**  
 2 mM in D<sub>2</sub>O, 500 MHz, 298 K, 200-ms spin-locking mixing time  
 tetramer predominates

Assignments of Lys<sub>16</sub> vs. Lys<sub>16'</sub>, Glu<sub>23</sub> vs. Glu<sub>23'</sub>, Gln<sub>15</sub> vs. Gln<sub>15'</sub>, and Orn<sub>1</sub> vs. Orn<sub>2</sub> are arbitrary

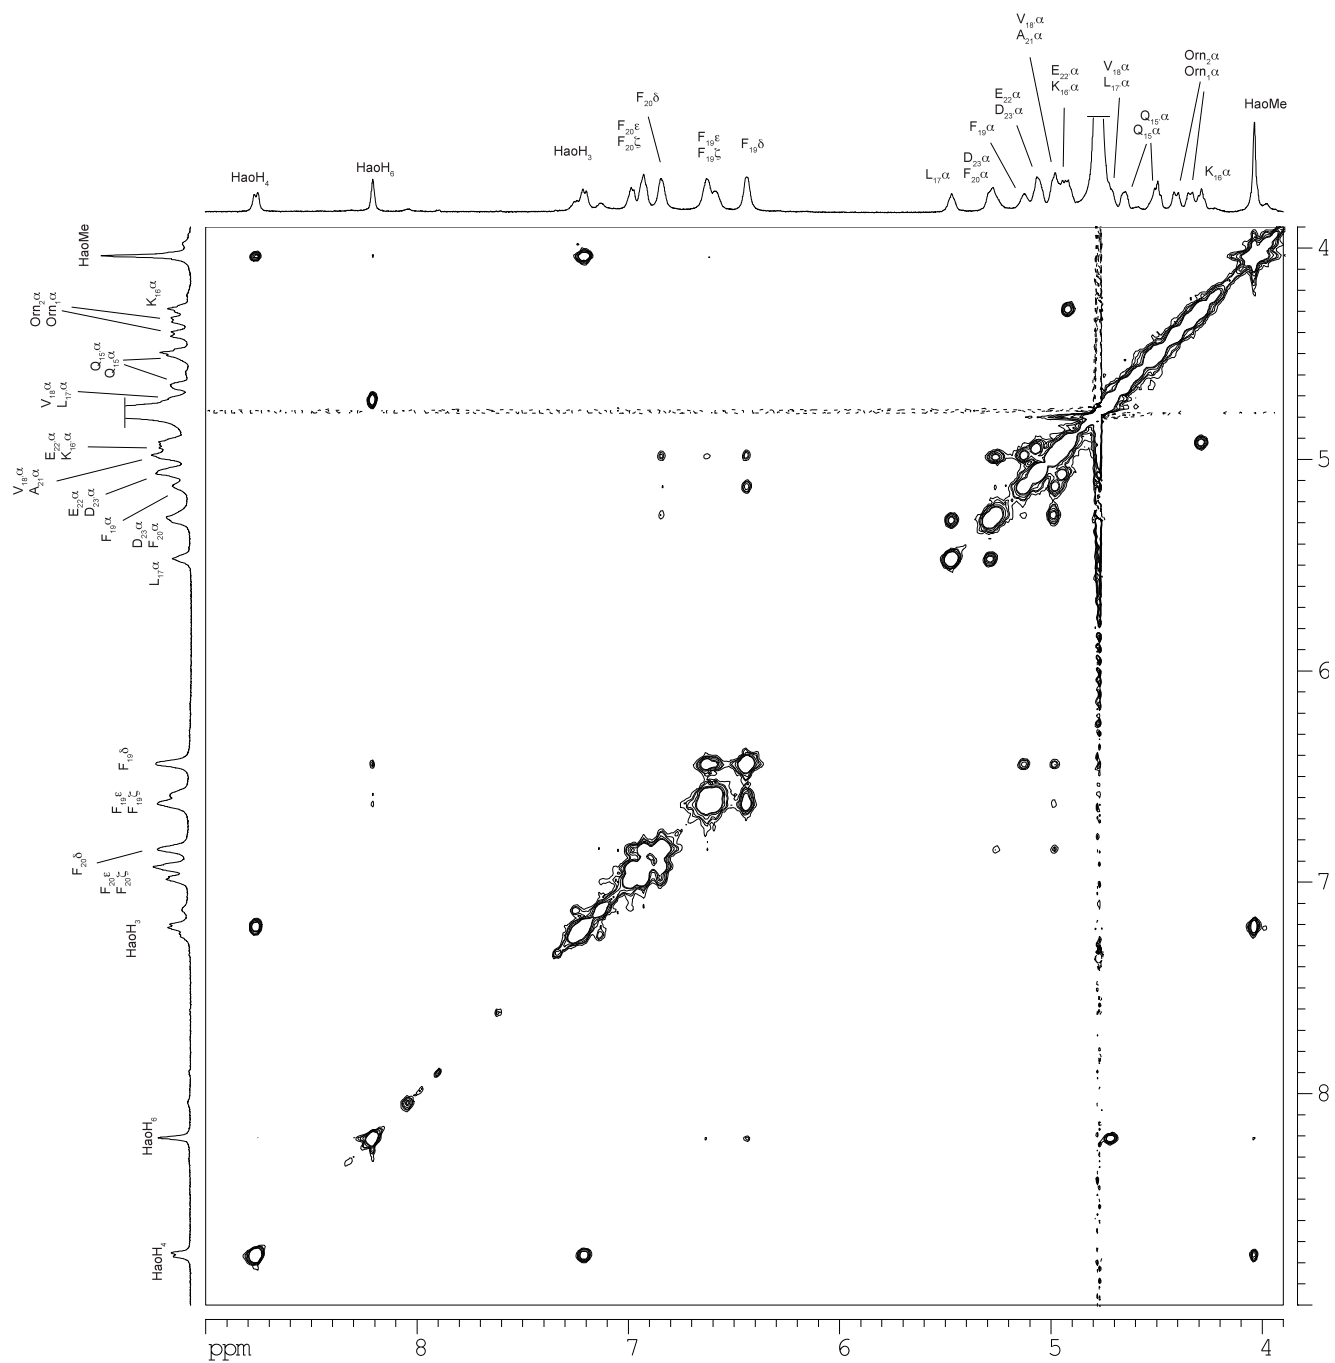

# 2D NOESY spectrum of macrocyclic $\beta$ -sheet **4** 2 mM in D<sub>2</sub>O, 500 MHz, 298 K, 200-ms spin-locking mixing time tetramer predominates

Assignments of Lys<sub>16</sub> vs. Lys<sub>16'</sub>, Glu<sub>23</sub> vs. Glu<sub>23'</sub>, Gln<sub>15</sub> vs. Gln<sub>15'</sub>, and Orn<sub>1</sub> vs. Orn<sub>2</sub> are arbitrary

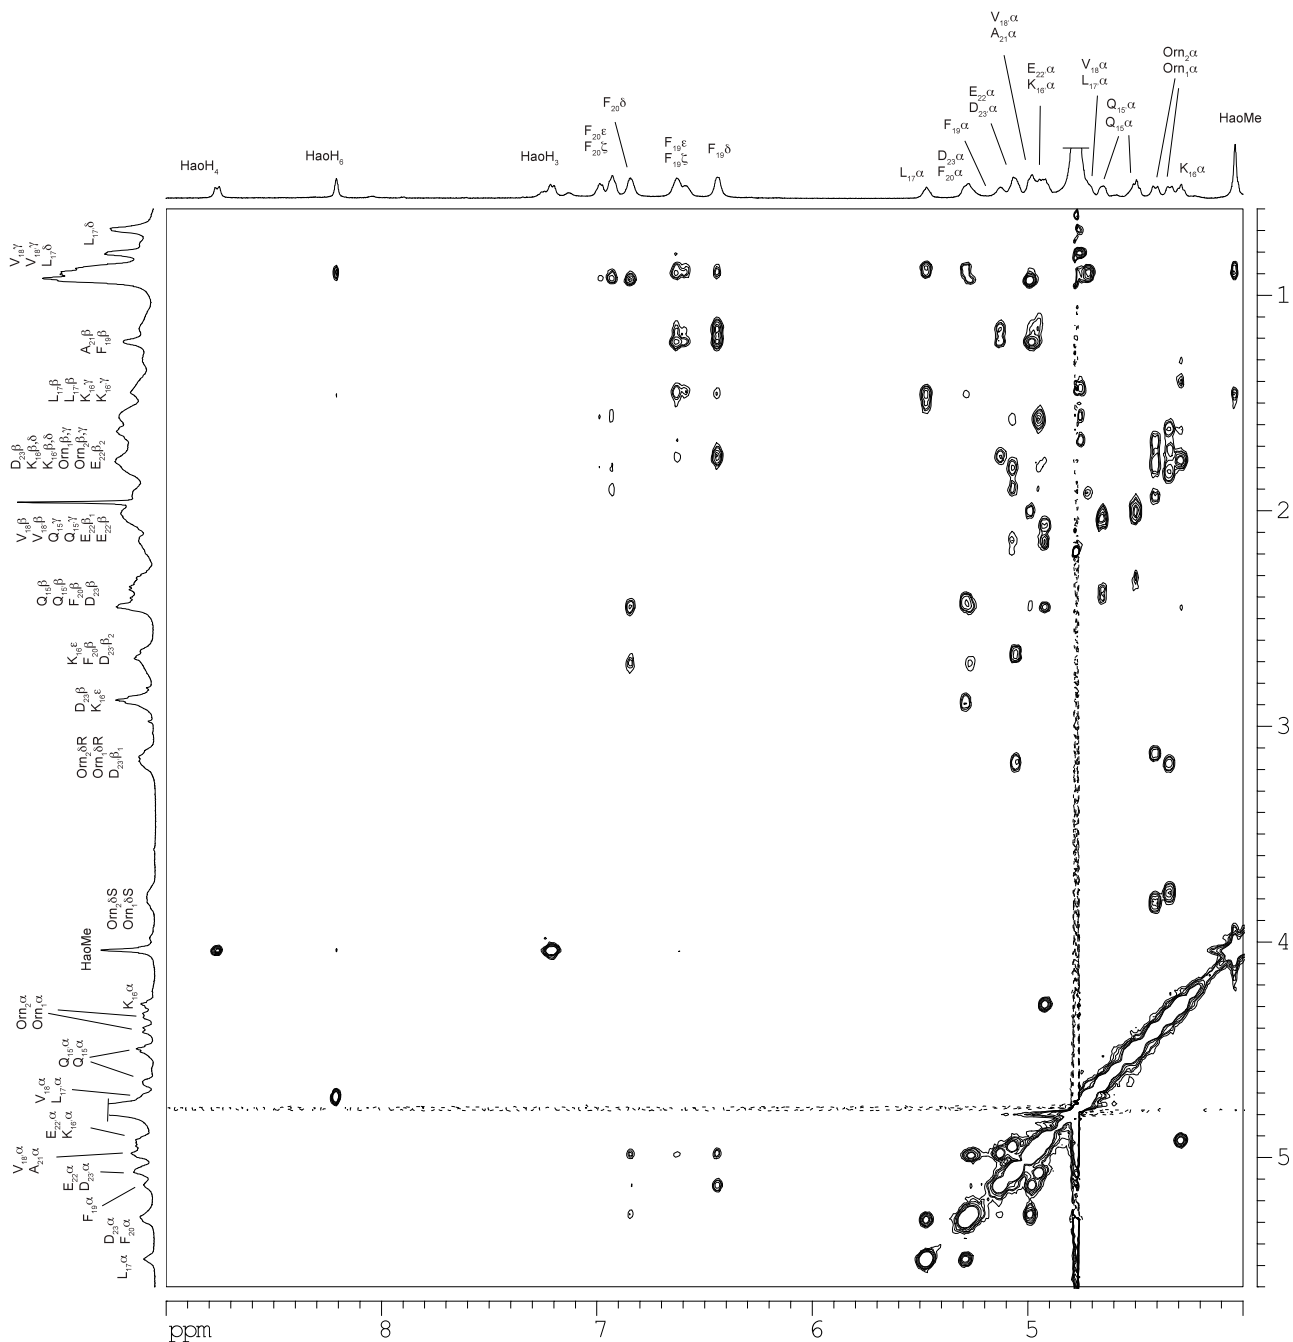

2D DOSY spectrum of macrocyclic  $\beta$ -sheet **4**  
2 mM in D<sub>2</sub>O, 600 MHz, 298 K  
tetramer predominates

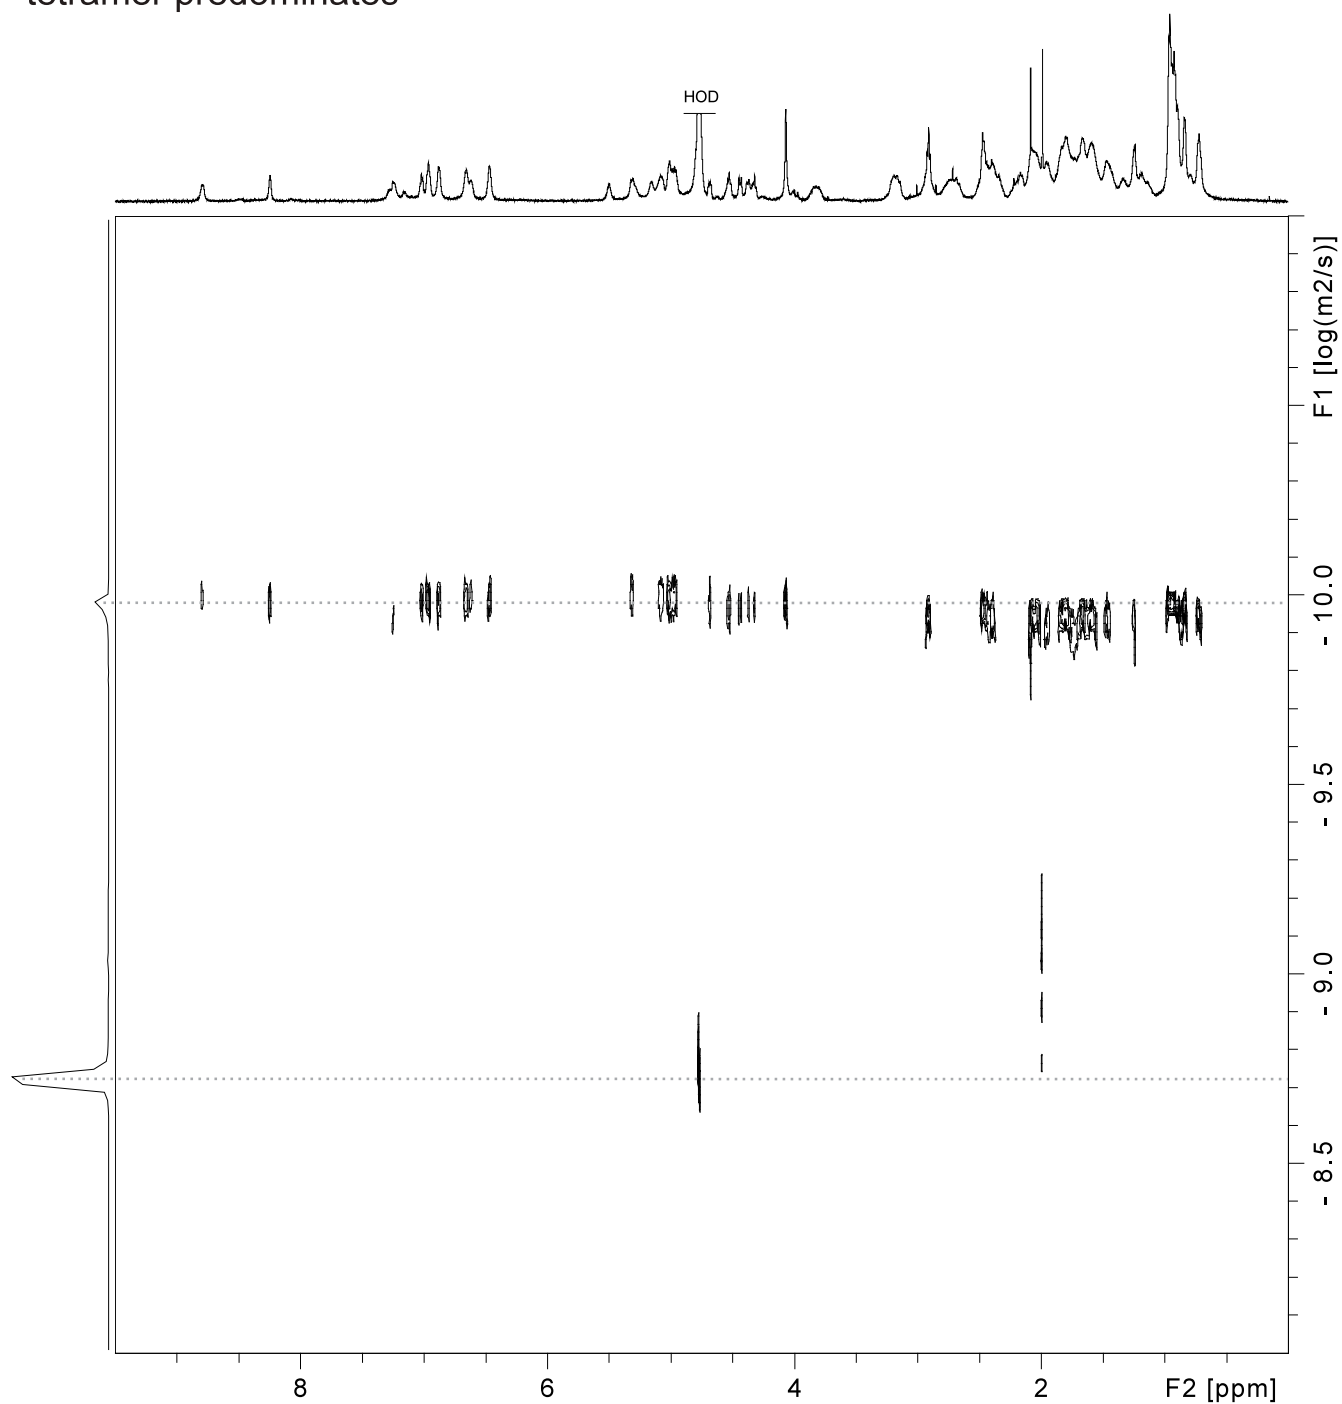

Calculation for peptide **4** at 2.0 mM

$$DC_{\text{HOD}} = 19.0 \times 10^{-10} \text{ m}^2/\text{s}^{\text{a}}$$
$$\log DC_{\text{HOD}} = -8.721$$

For peptide **4** tetramer,  $\log DC (\text{m}^2/\text{s}) = -9.98(8)$ ,  $DC = 10^{-9.988} \text{ m}^2/\text{s} = 10.3 \times 10^{-11} \text{ m}^2/\text{s} = 10.3 \times 10^{-7} \text{ cm}^2/\text{s}$

<sup>a</sup> Longworth, L. G. J. Phys. Chem. 1960, 64, 1914–1917.

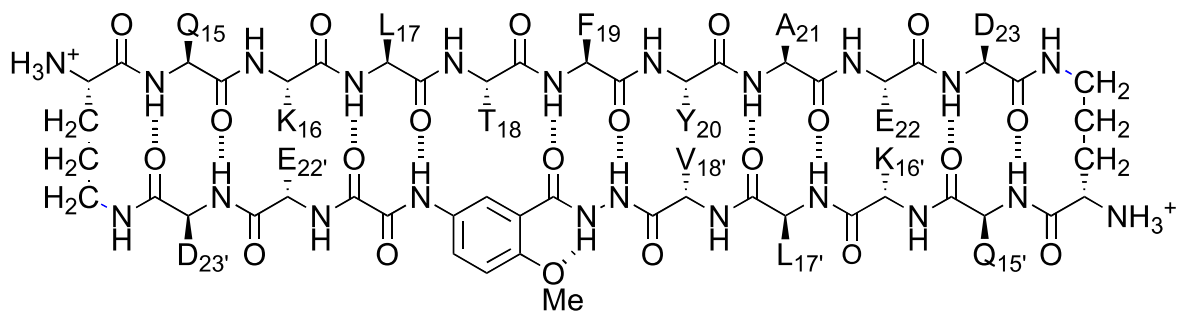

macrocyclic  $\beta$ -sheet peptide **5** (as the TFA salt)

molecular weight calculated for  $C_{102}H_{154}N_{26}O_{33} \cdot 4CF_3CO_2H$  (TFA salt of **5**): 2728.56

molecular weight calculated for  $C_{102}H_{154}N_{26}O_{33}$  (free base of **5**): 2272.47

exact mass calculated for  $C_{102}H_{154}N_{26}O_{33}$  (free base of **5**): 2271.12

## Analytical RP-HPLC of macrocyclic $\beta$ -peptide **5**

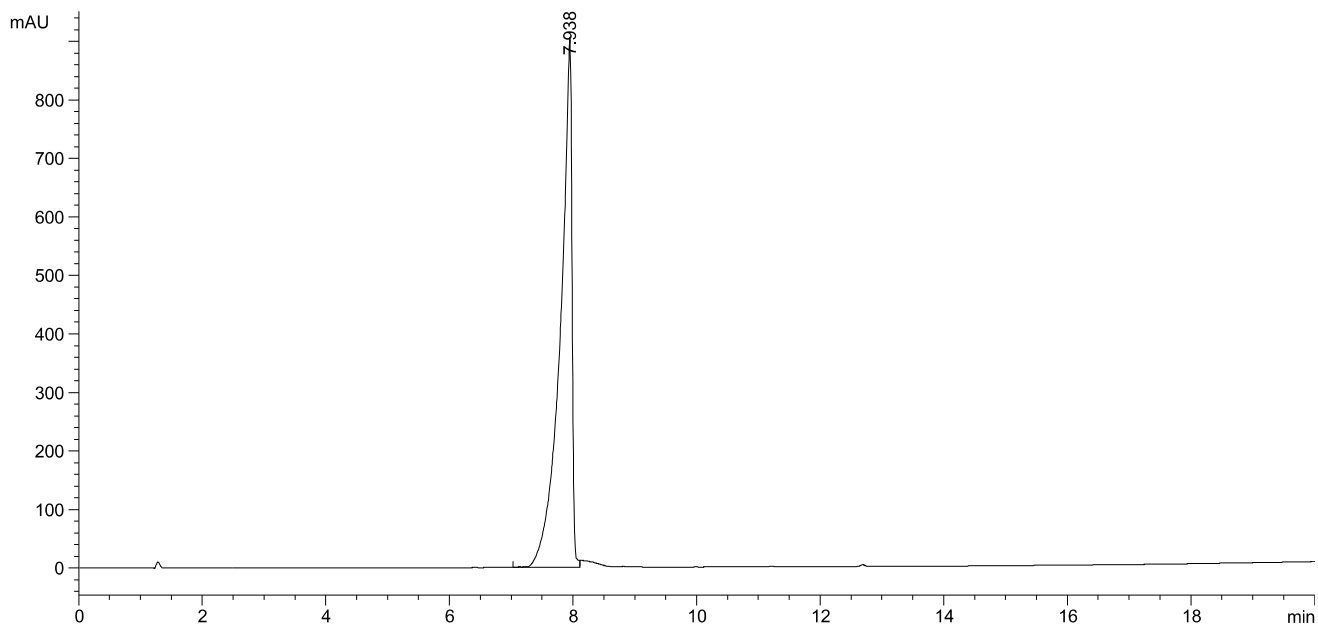

Signal 1: VWD1 A, Wavelength=254 nm

| Peak # | RetTime [min] | Type | Width [min] | Area mAU *s | Height [mAU] | Area %   |
|--------|---------------|------|-------------|-------------|--------------|----------|
| 1      | 7.938         | VV   | 0.1715      | 1.17436e4   | 906.91034    | 100.0000 |

Totals : 1.17436e4 906.91034

# Macrocytic $\beta$ -sheet peptide 5

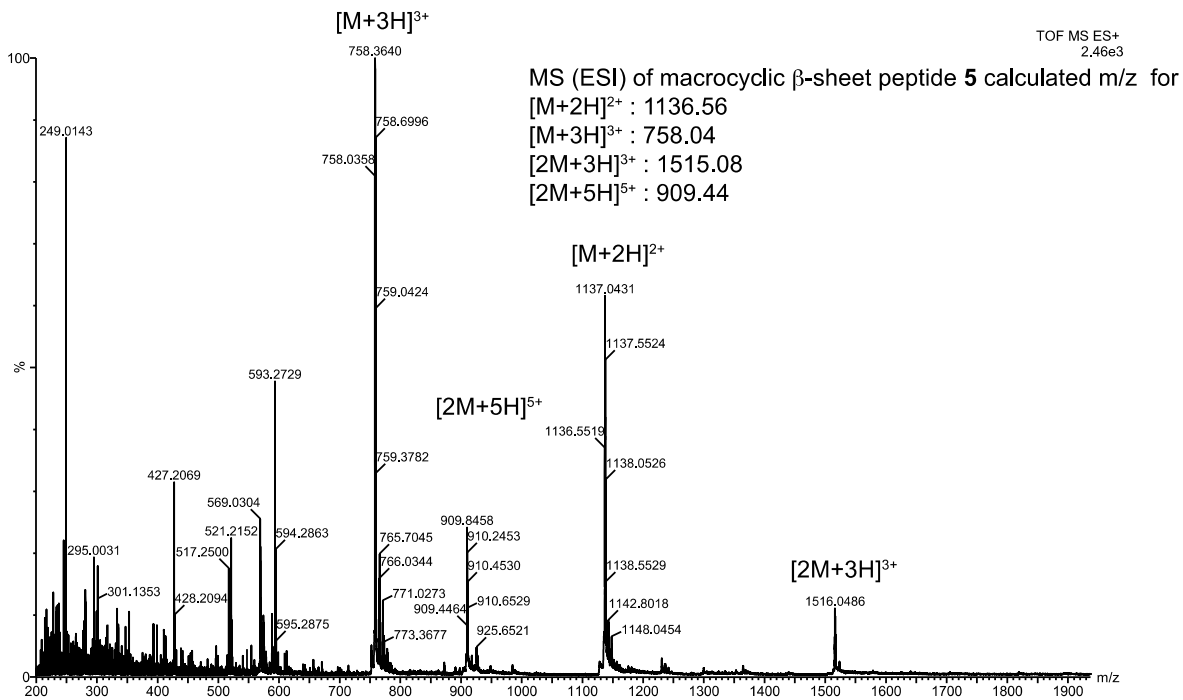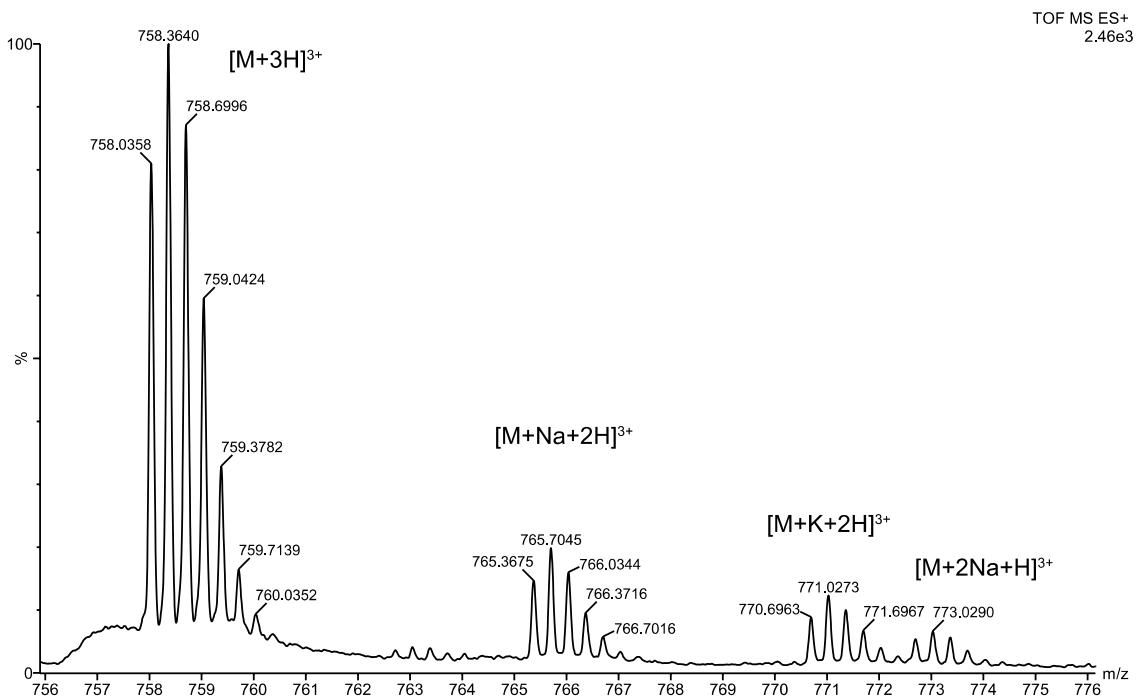



# Macrocyclic $\beta$ -sheet peptide 5

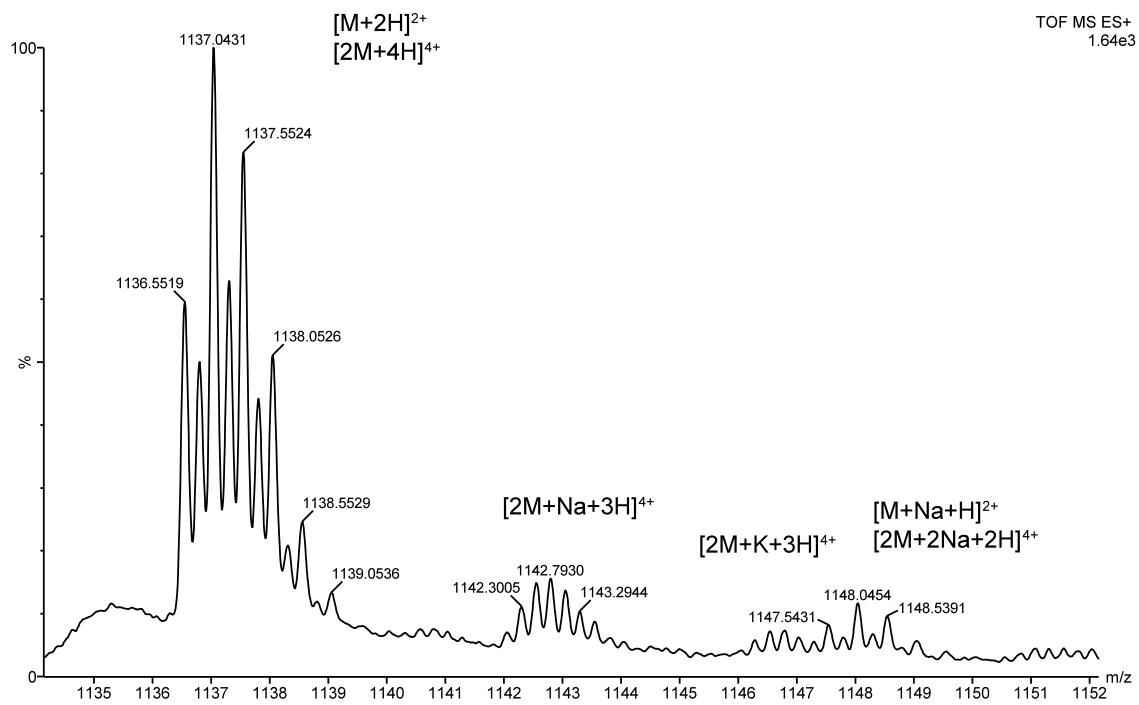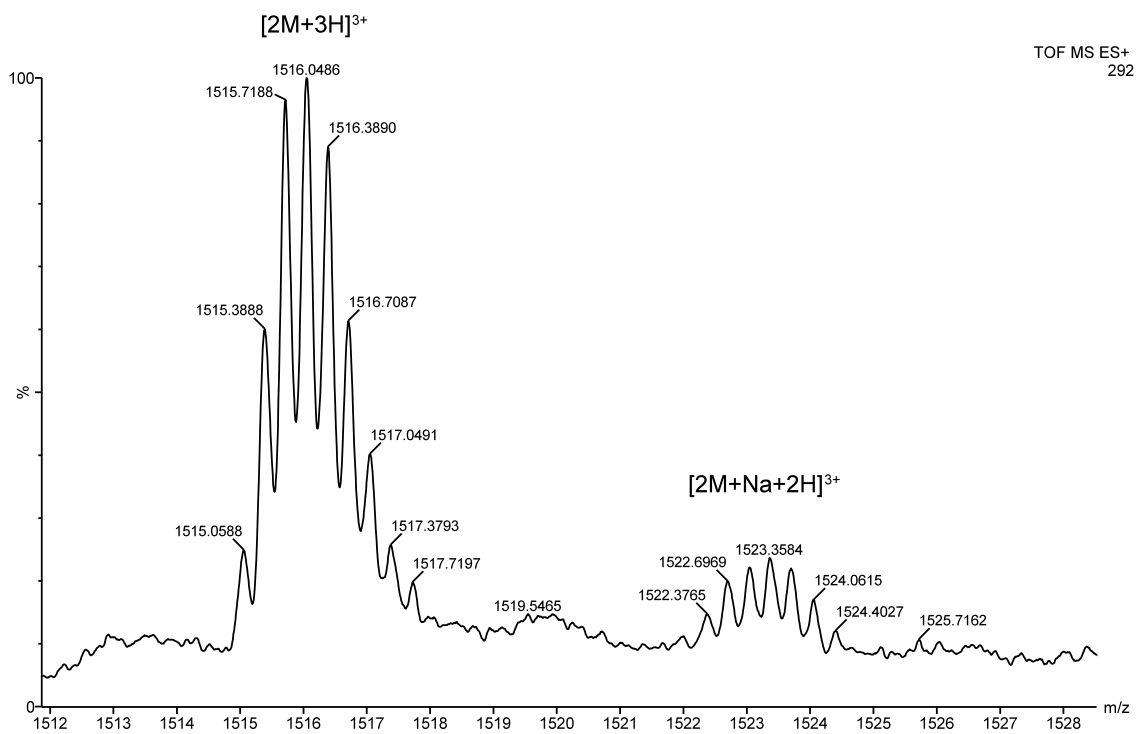

# Macrocyclic $\beta$ -sheet peptide **5**

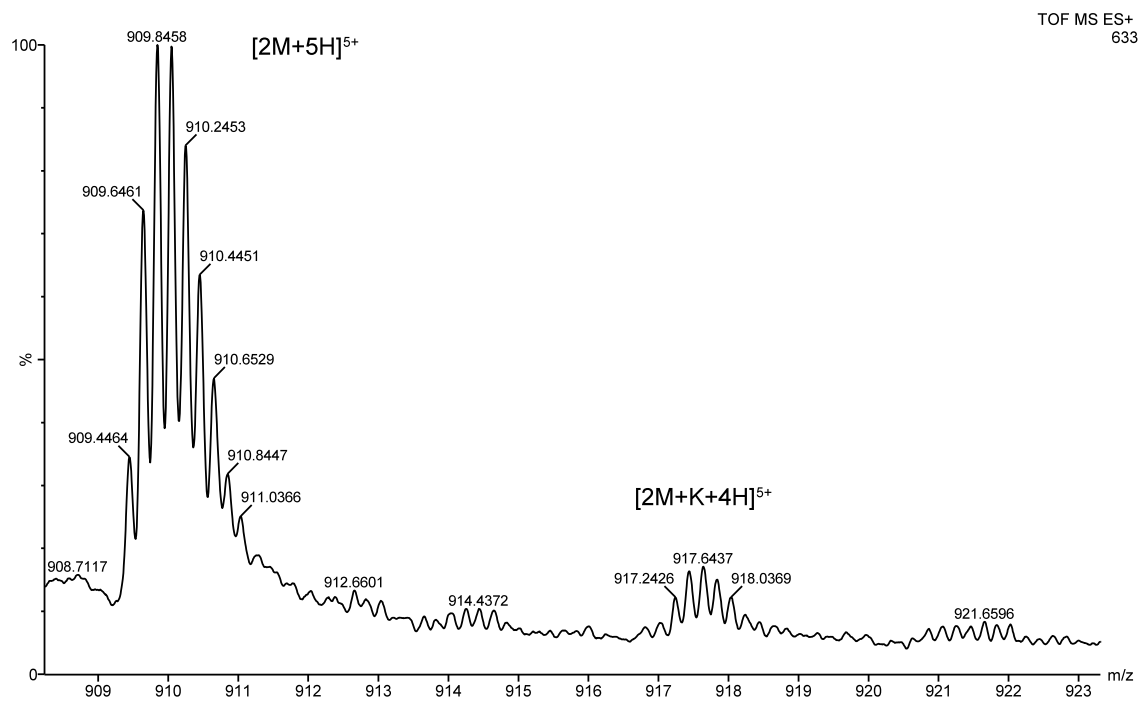



# 2D TOCSY spectrum of macrocyclic $\beta$ -sheet **5**

2 mM in  $D_2O$ , 500 MHz, 298 K

150-ms spin-locking mixing time

tetramer predominates

Assignments of Lys<sub>16</sub> vs. Lys<sub>16'</sub>, Glu<sub>23</sub> vs. Glu<sub>23'</sub>,  
Gln<sub>15</sub> vs. Gln<sub>15'</sub>, and Orn<sub>1</sub> vs Orn<sub>2</sub> are arbitrary

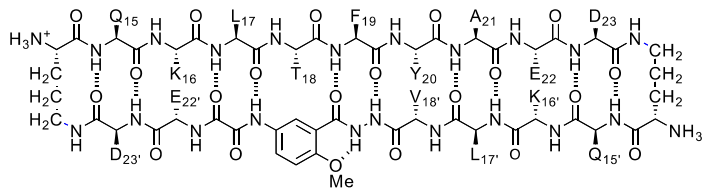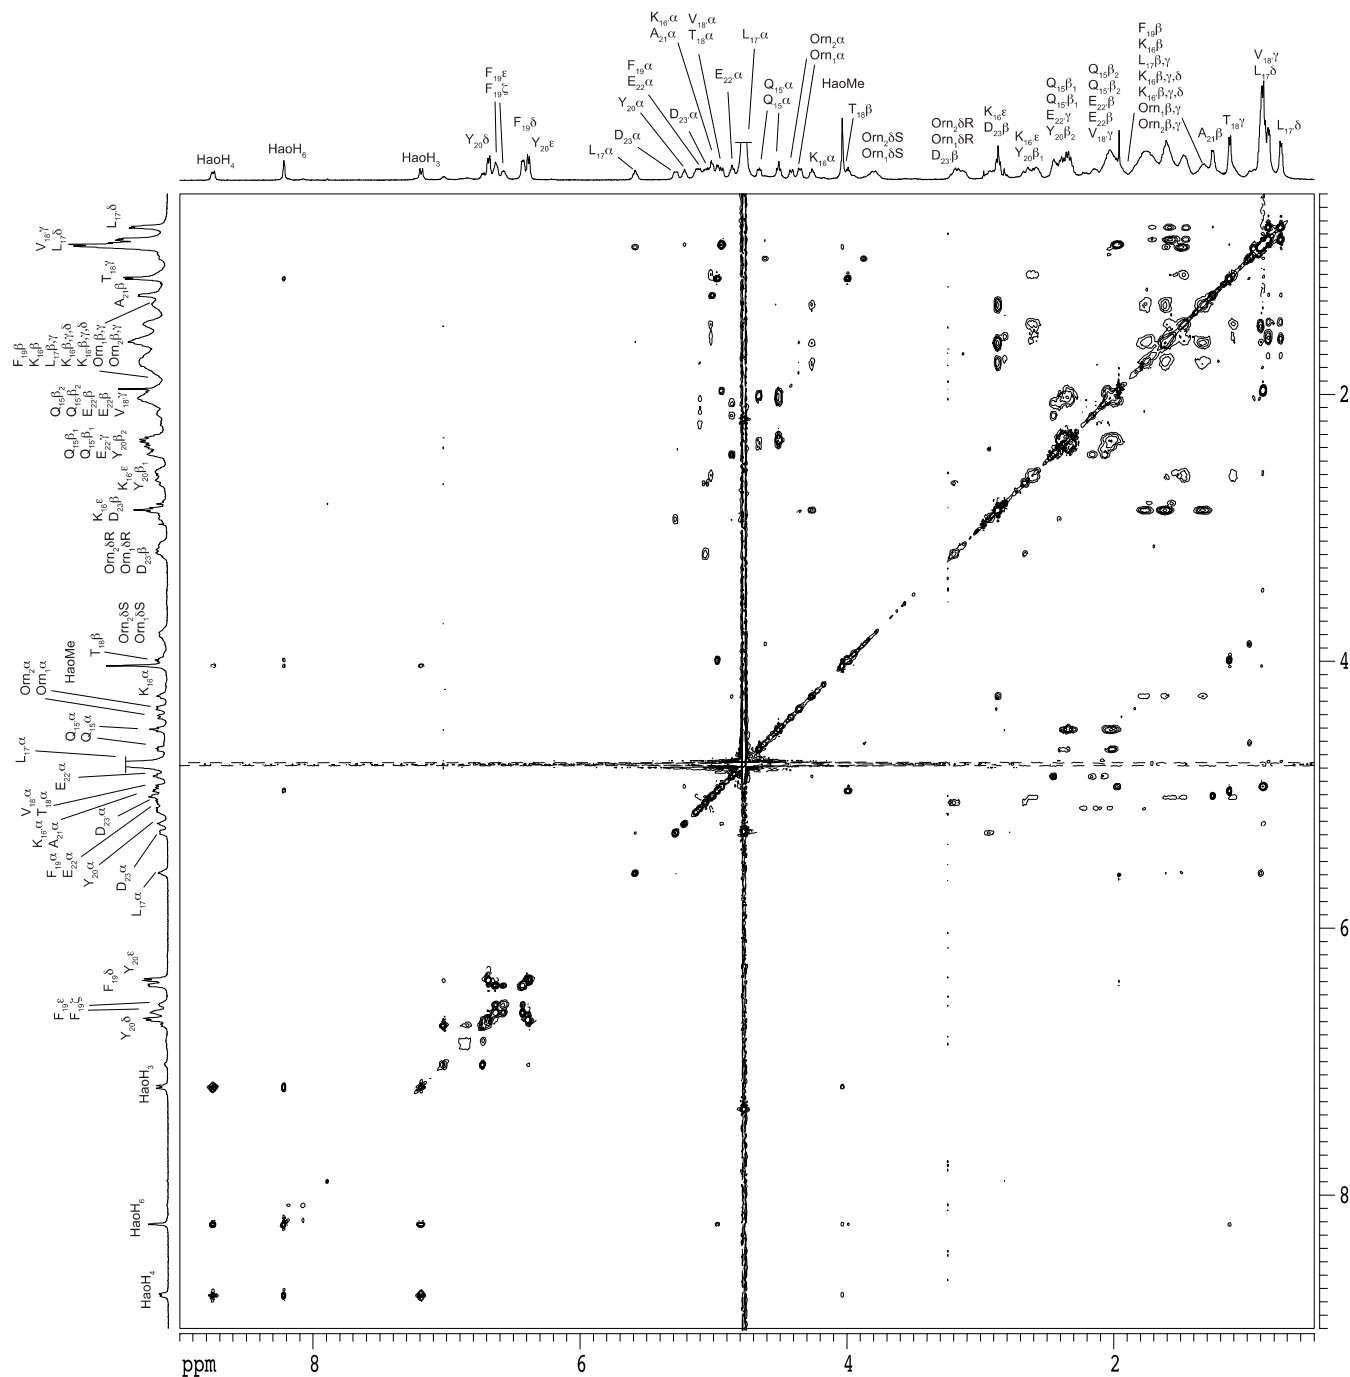



# 2D TOCSY spectrum of macrocyclic $\beta$ -sheet **5**

2 mM in  $D_2O$ , 500 MHz, 298 K

150-ms spin-locking mixing time

tetramer predominates

Assignments of Lys<sub>16</sub> vs. Lys<sub>16'</sub>, Glu<sub>23</sub> vs. Glu<sub>23'</sub>, Gln<sub>15</sub> vs. Gln<sub>15'</sub>, and Orn<sub>1</sub> vs. Orn<sub>2</sub> are arbitrary

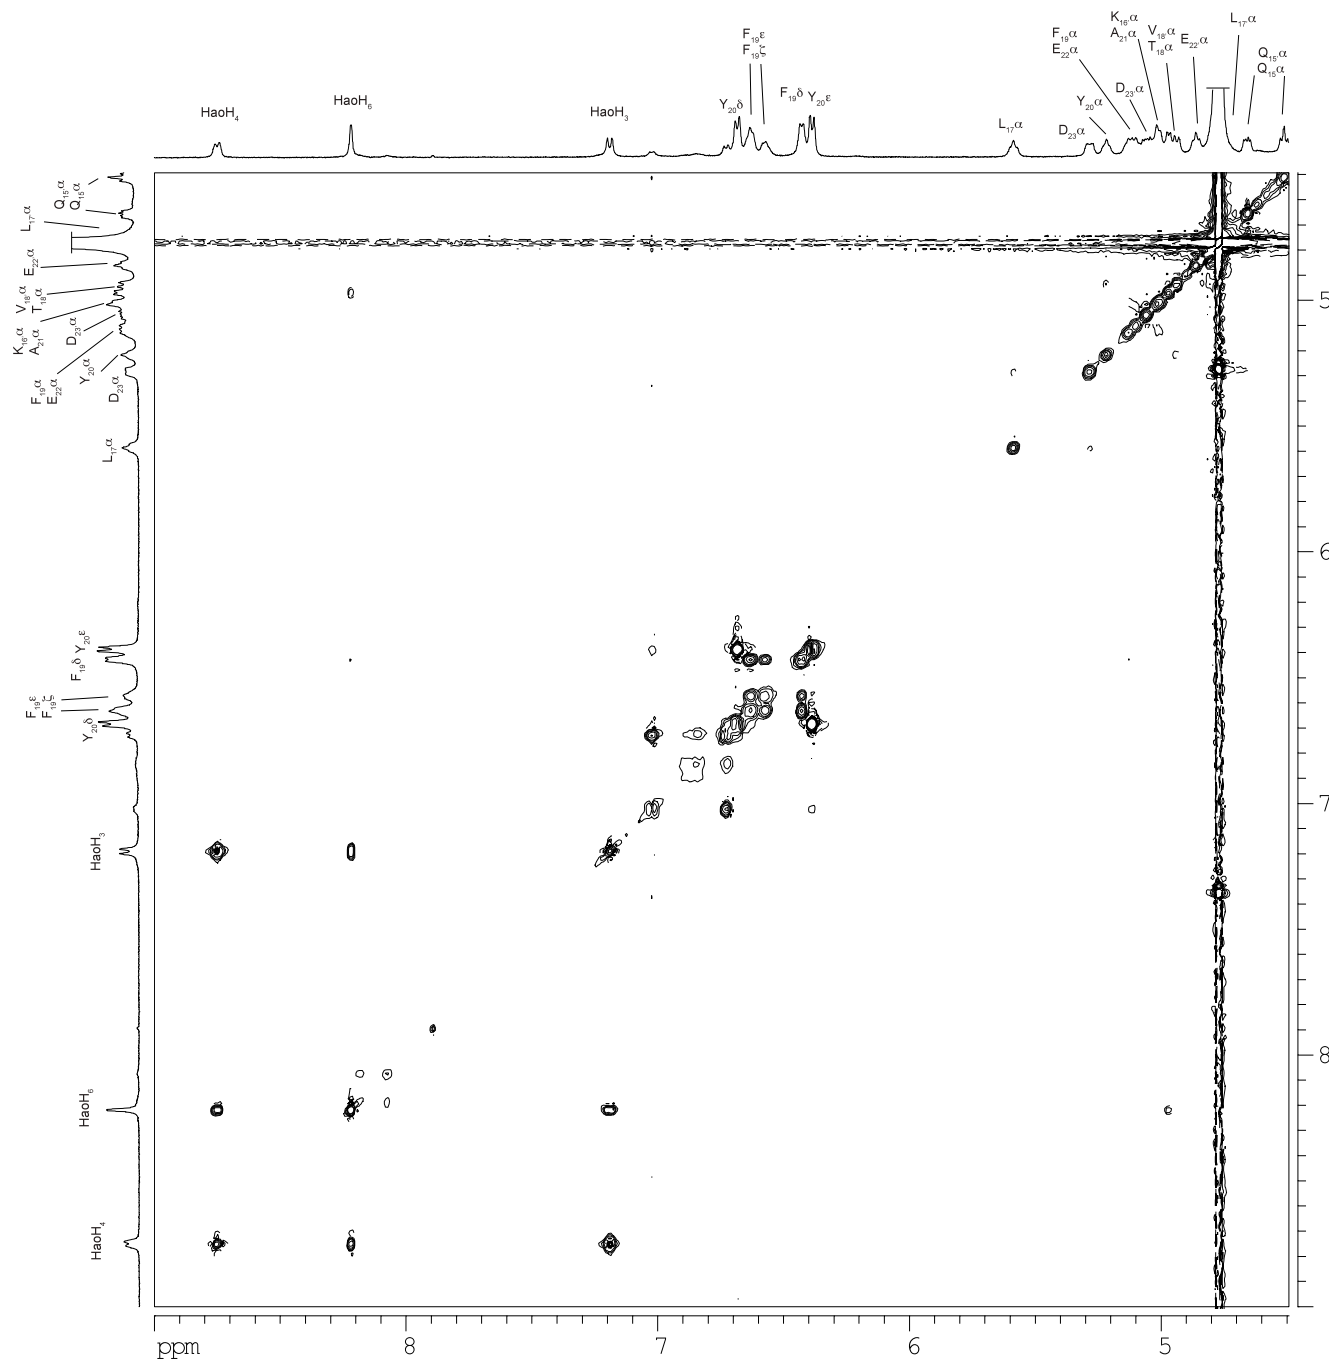

# 2D NOESY spectrum of macrocyclic $\beta$ -sheet **5**

2 mM in D<sub>2</sub>O, 500 MHz, 298 K  
200-ms spin-locking mixing time  
tetramer predominates

Assignments of Lys<sub>16</sub> vs. Lys<sub>16'</sub>, Glu<sub>23</sub> vs. Glu<sub>23'</sub>,  
Gln<sub>15</sub> vs. Gln<sub>15'</sub>, and Orn<sub>1</sub> vs Orn<sub>2</sub> are arbitrary

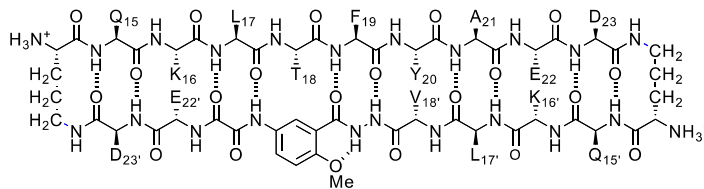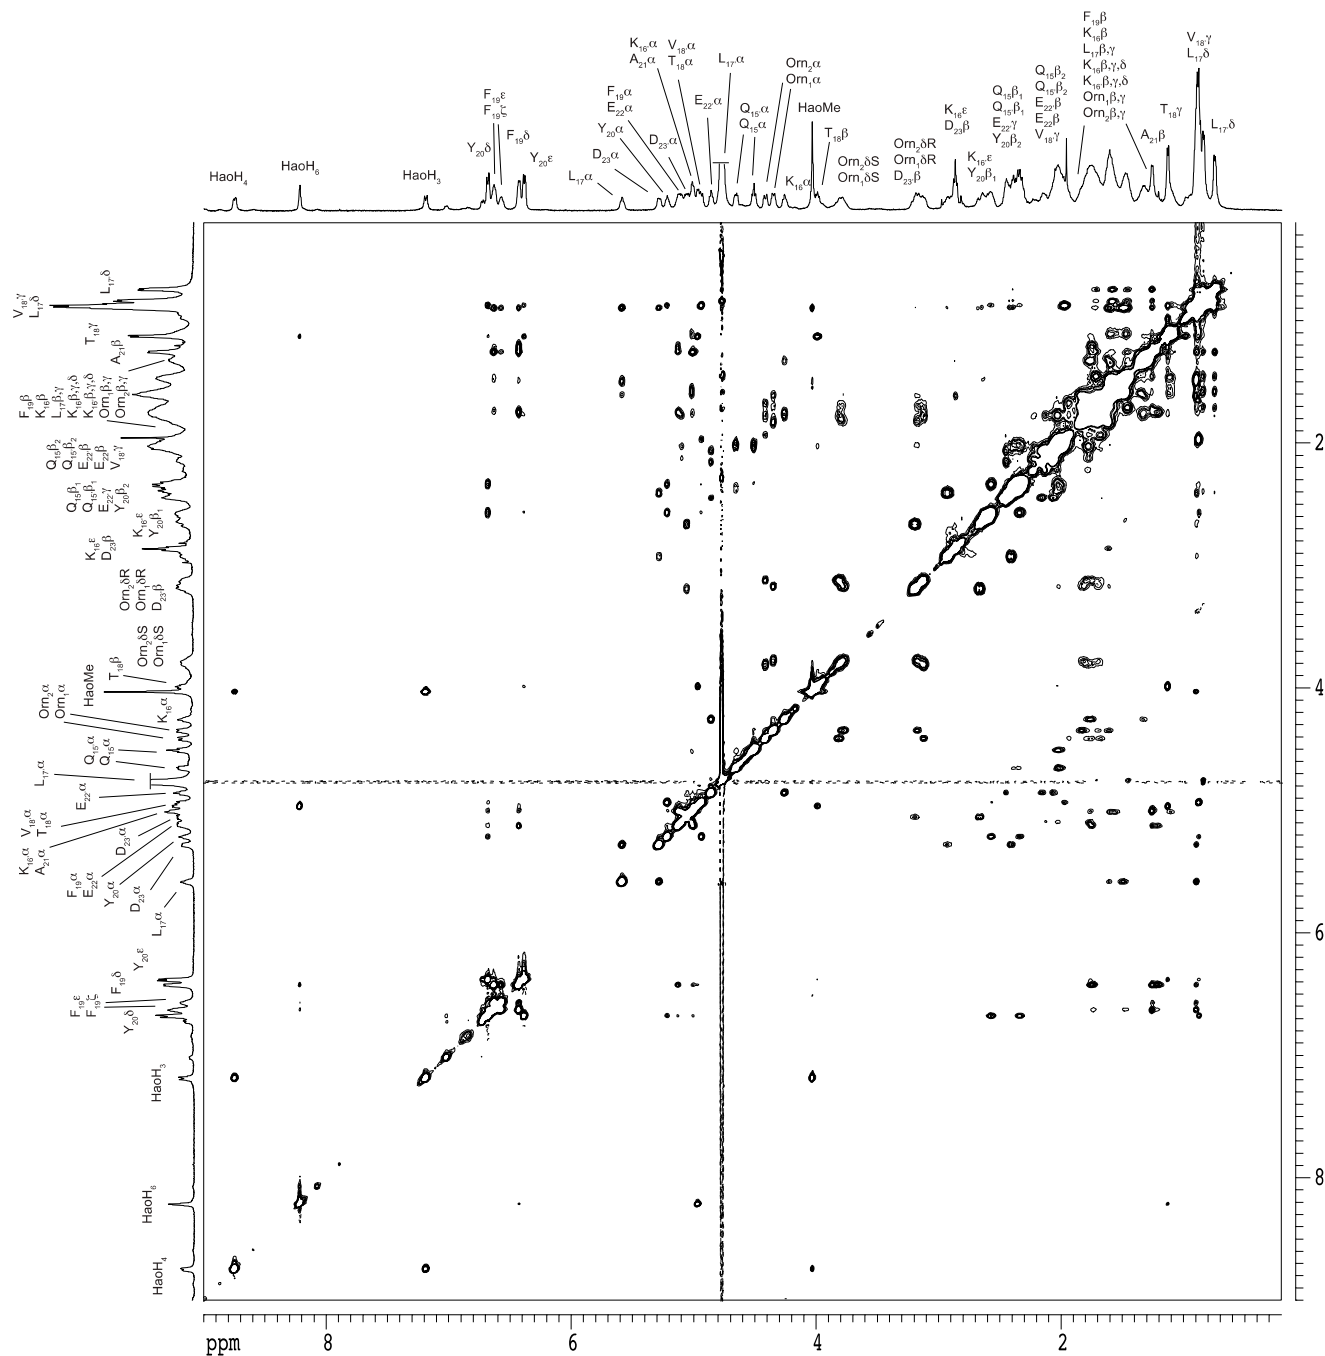

# 2D NOESY spectrum of macrocyclic $\beta$ -sheet 5

2 mM in  $D_2O$ , 500 MHz, 298 K

200-ms spin-locking mixing time

tetramer predominates

Assignments of Lys<sub>16</sub> vs. Lys<sub>16'</sub>, Glu<sub>23</sub> vs. Glu<sub>23'</sub>, Gln<sub>15</sub> vs. Gln<sub>15'</sub>, and Orn<sub>1</sub> vs Orn<sub>2</sub> are arbitrary

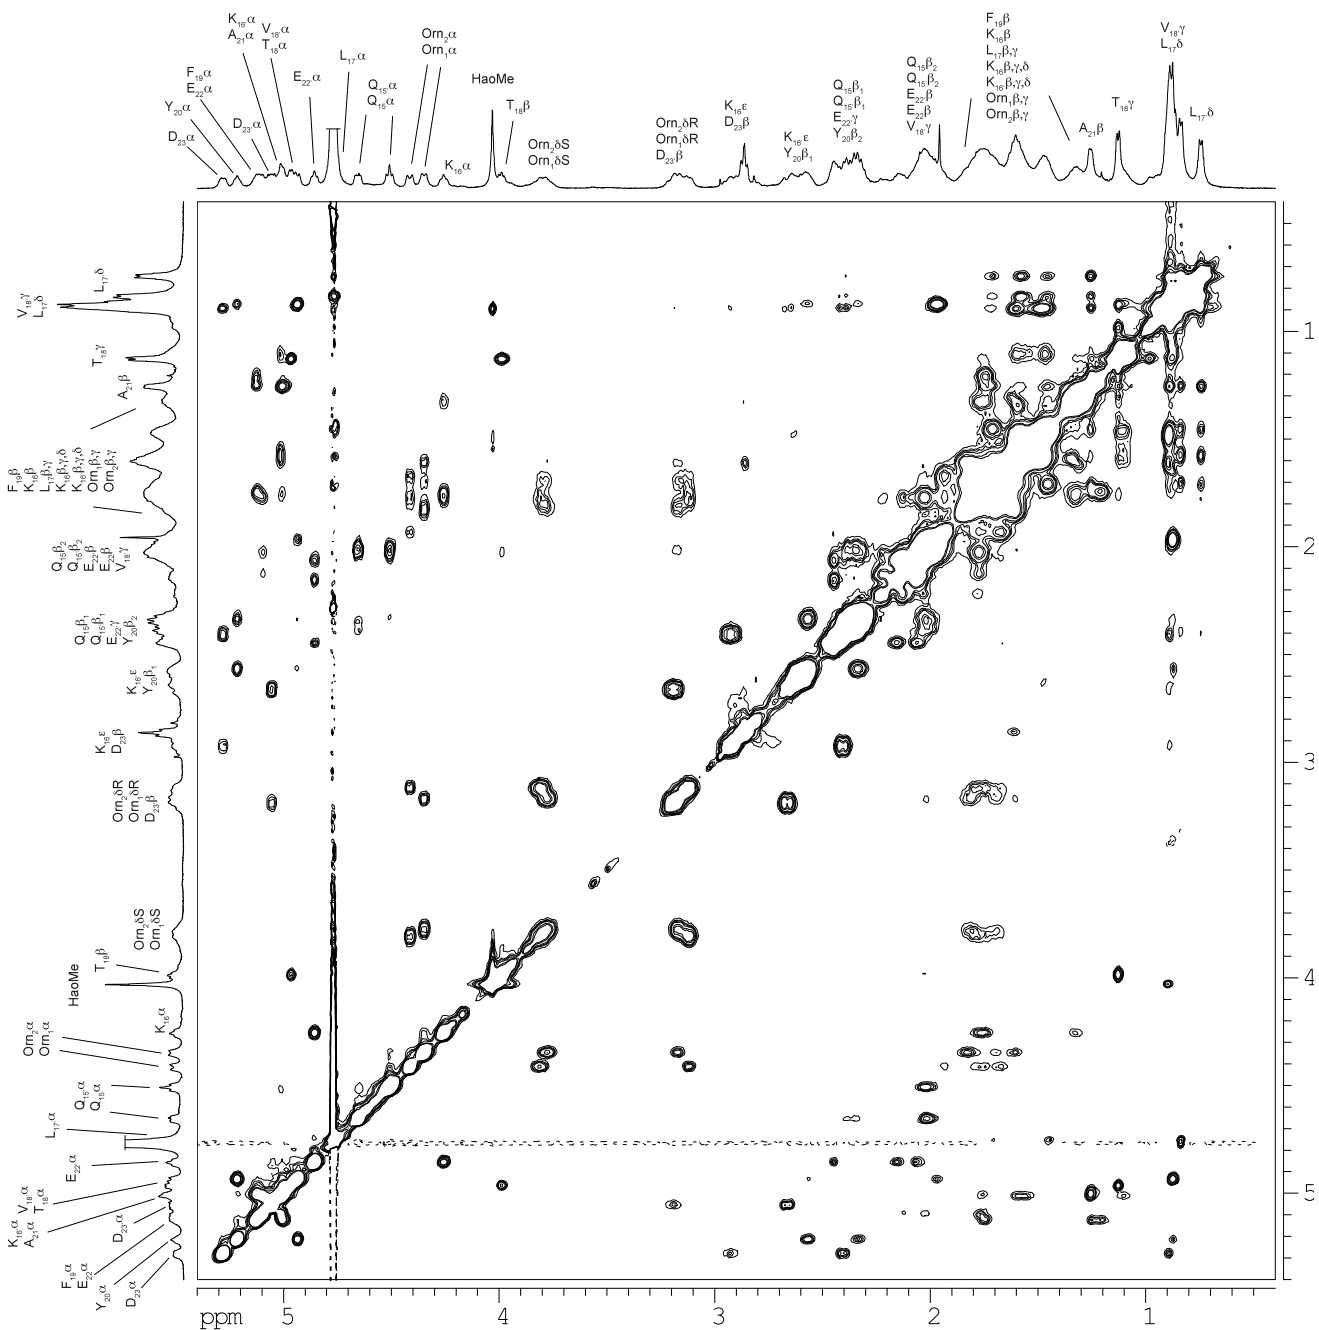



# 2D NOESY spectrum of macrocyclic $\beta$ -sheet **5**

2 mM in  $D_2O$ , 500 MHz, 298 K

200-ms spin-locking mixing time

tetramer predominates

Assignments of Lys<sub>16</sub> vs. Lys<sub>16'</sub>, Glu<sub>23</sub> vs. Glu<sub>23'</sub>, Gln<sub>15</sub> vs. Gln<sub>15'</sub>, and Orn<sub>1</sub> vs. Orn<sub>2</sub> are arbitrary

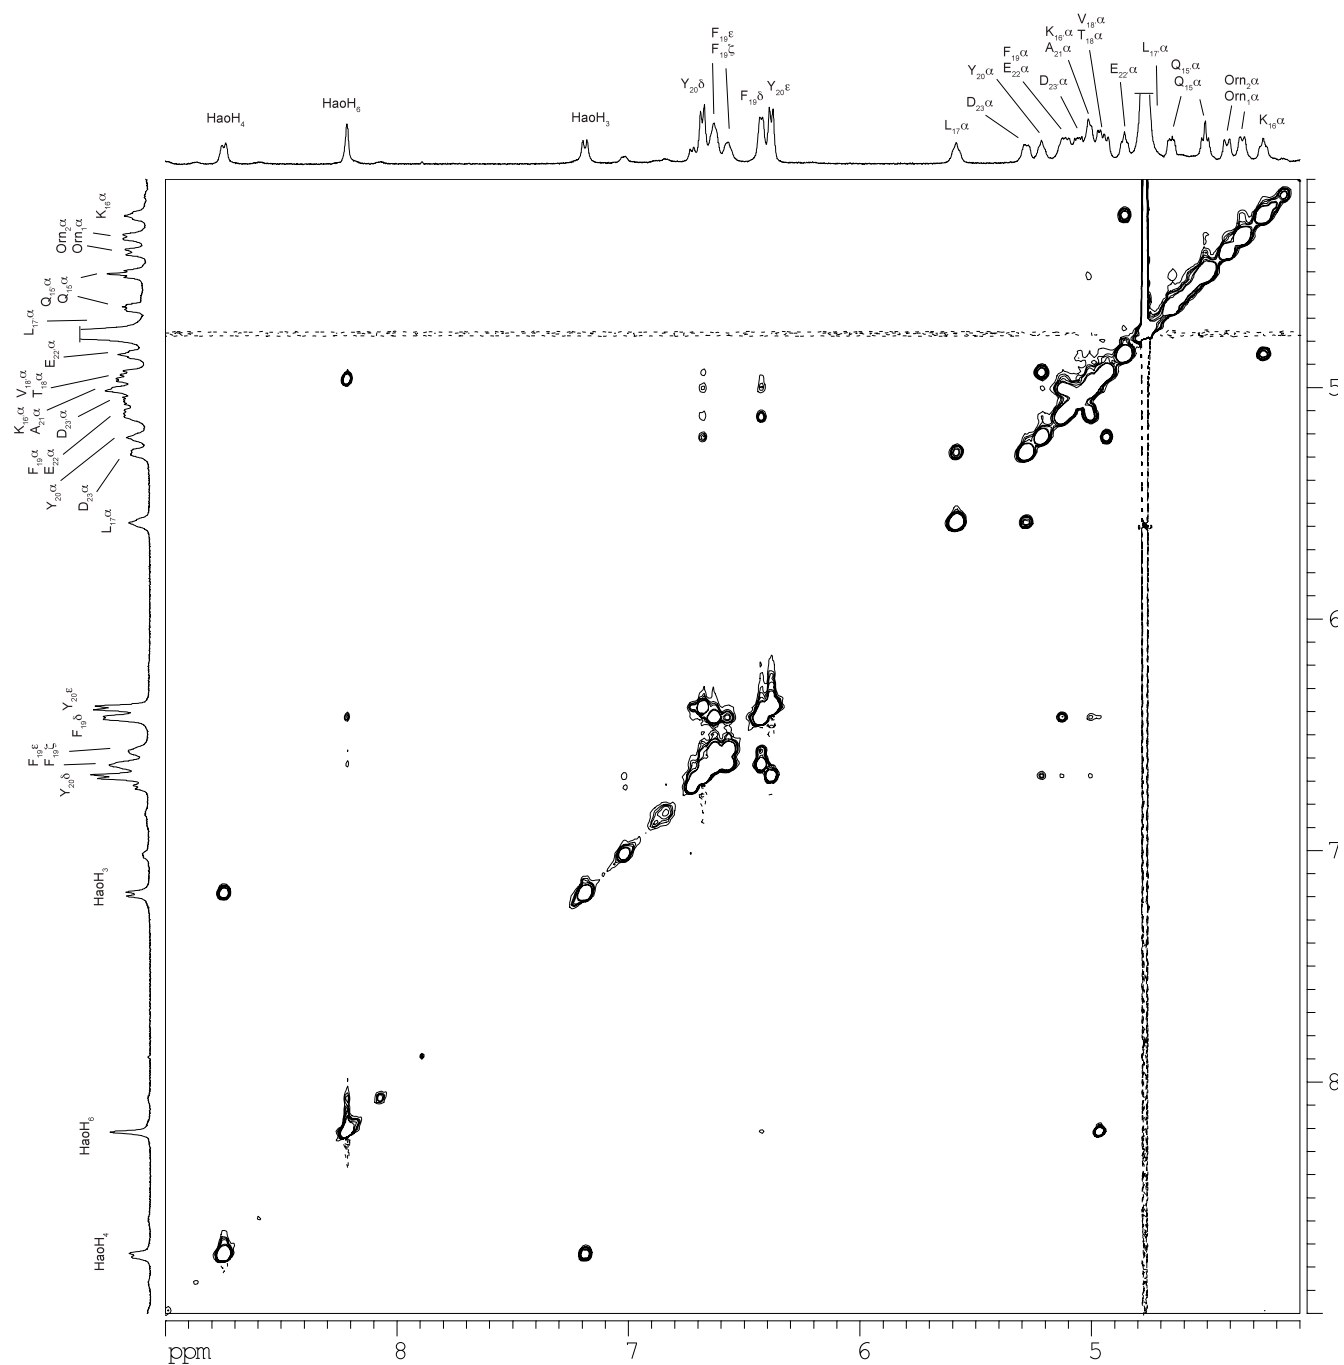

# 2D NOESY spectrum of macrocyclic $\beta$ -sheet **5**

2 mM in D<sub>2</sub>O, 500 MHz, 298 K

200-ms spin-locking mixing time

tetramer predominates

Assignments of Lys<sub>16</sub> vs. Lys<sub>16'</sub>, Glu<sub>23</sub> vs. Glu<sub>23'</sub>, Gln<sub>15</sub> vs. Gln<sub>15'</sub>, and Orn<sub>1</sub> vs Orn<sub>2</sub> are arbitrary

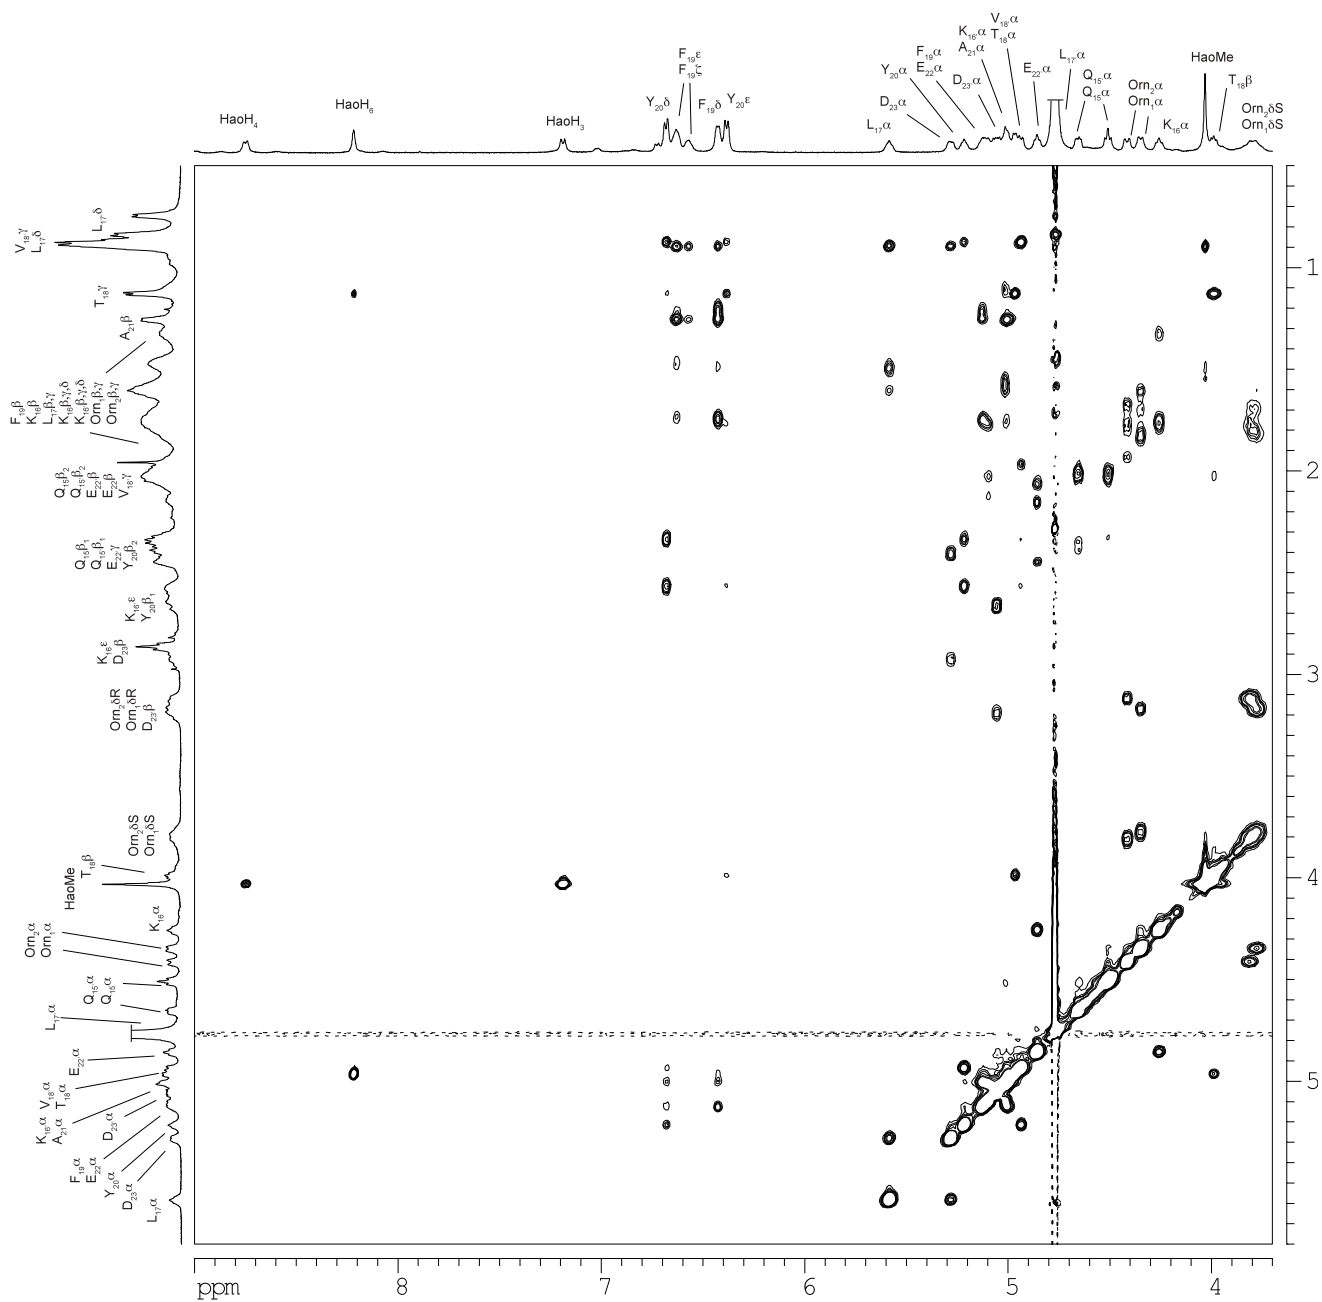

2D DOSY spectrum of macrocyclic  $\beta$ -sheet **5**  
2 mM in D<sub>2</sub>O, 600 MHz, 298 K  
tetramer predominates

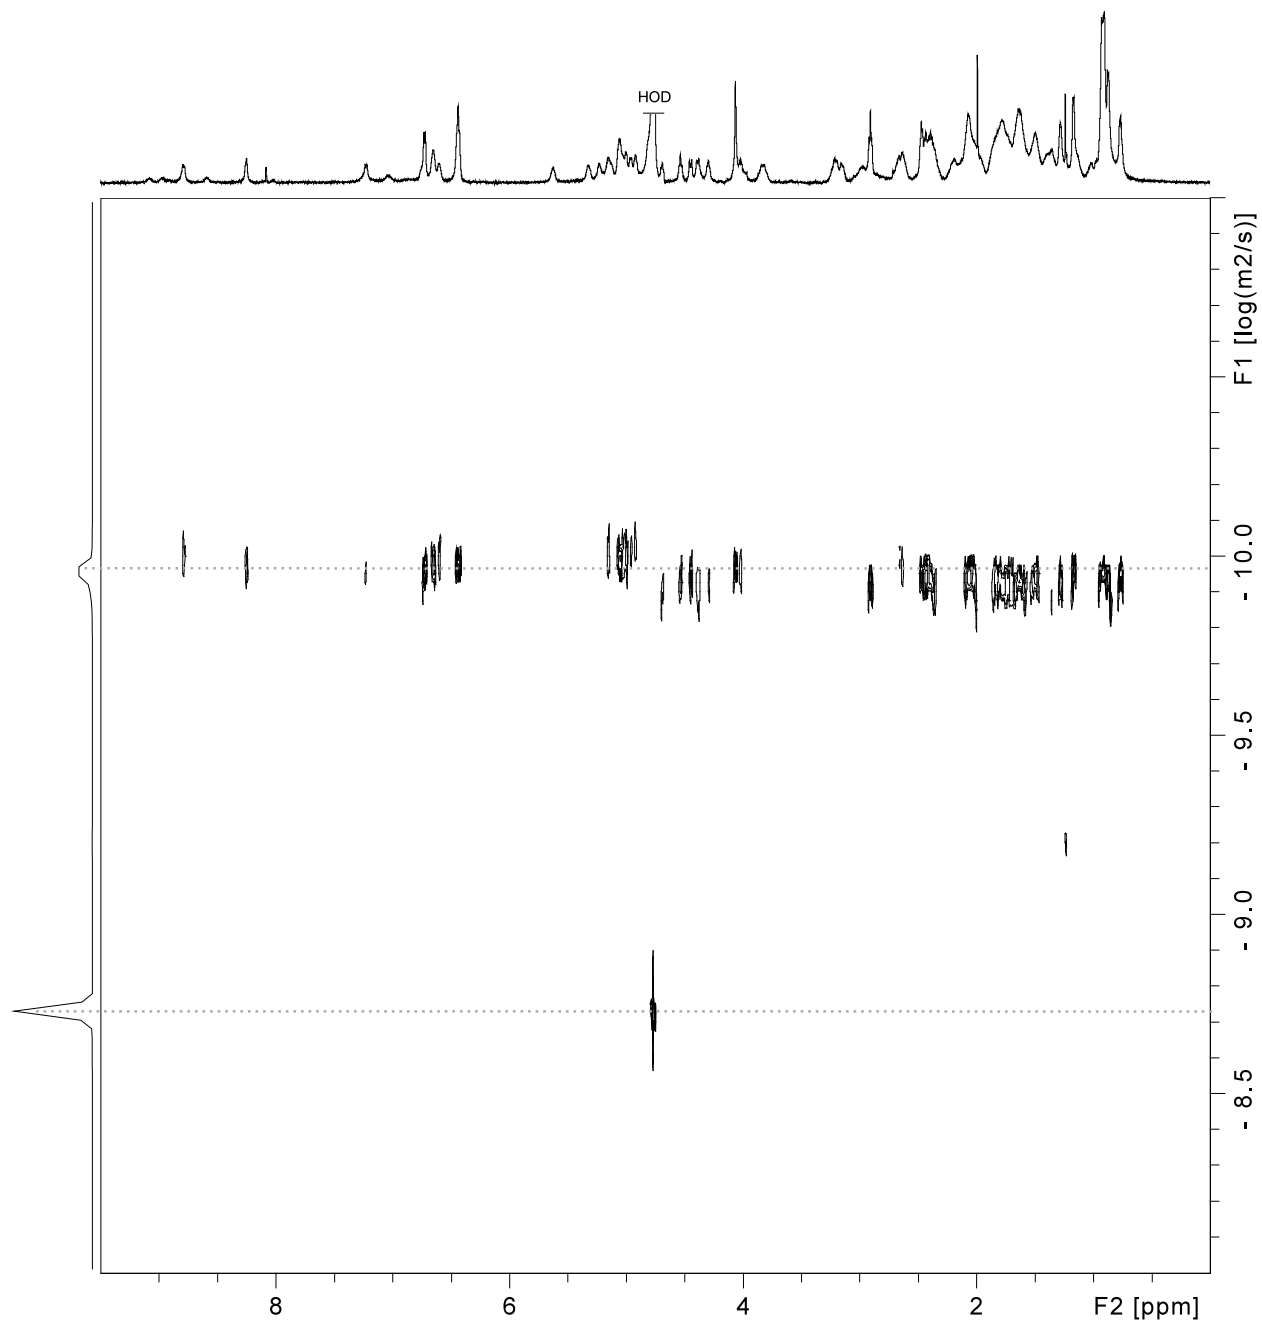

Calculation for peptide **5** at 2.0 mM

$$DC_{\text{HOD}} = 19.0 \times 10^{-10} \text{ m}^2/\text{s}^{\text{a}}$$
$$\log DC_{\text{HOD}} = -8.721$$

$$\text{For peptide } \mathbf{5} \text{ tetramer, } \log DC \text{ (m}^2/\text{s)} = -9.97(0), DC = 10^{-9.970} \text{ m}^2/\text{s} = 10.7 \times 10^{-11} \text{ m}^2/\text{s} = 10.7 \times 10^{-7} \text{ cm}^2/\text{s}$$

<sup>a</sup> Longworth, L. G. J. Phys. Chem. 1960, 64, 1914–1917.

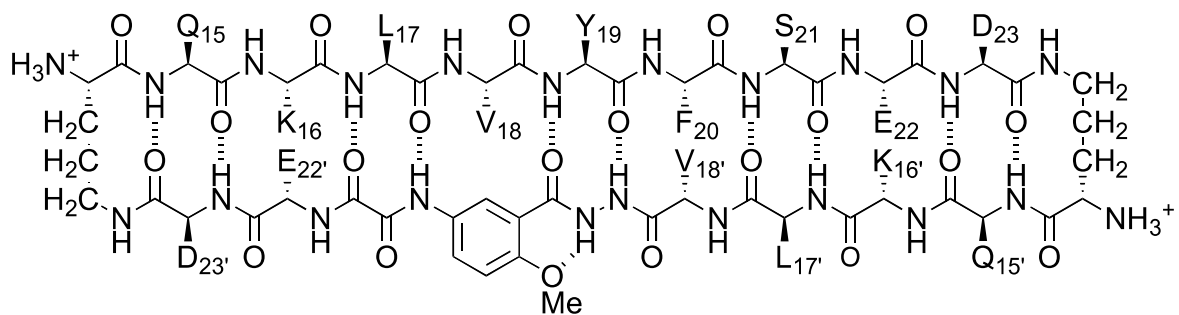

macrocyclic  $\beta$ -sheet peptide **6** (as the TFA salt)

molecular weight calculated for  $C_{103}H_{156}N_{26}O_{33} \cdot 4CF_3CO_2H$  (TFA salt of **6**): 2742.59

molecular weight calculated for  $C_{103}H_{156}N_{26}O_{33}$  (free base of **6**): 2286.50

exact mass calculated for  $C_{103}H_{156}N_{26}O_{33}$  (free base of **6**): 2285.13

### Analytical RP-HPLC of macrocyclic $\beta$ -sheet **6**

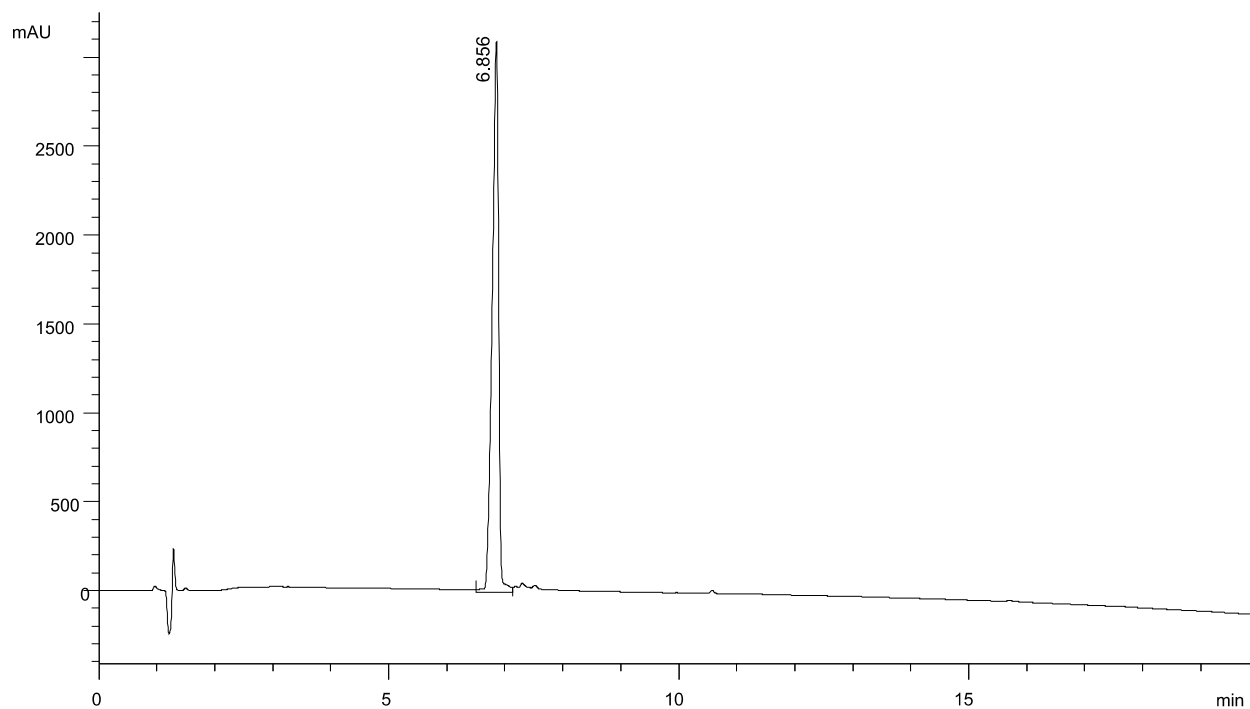

Signal 1:VWD1 A, Wavelength=214 nm

| Peak # | RT [min] | Type | Width [min] | Area mAU*s | Height [mAU] | Area %  |
|--------|----------|------|-------------|------------|--------------|---------|
| 1      | 6.856    | VV   | 0.108       | 23348.021  | 100.000      | 100.000 |

# Macrocyclic $\beta$ -sheet peptide **6**

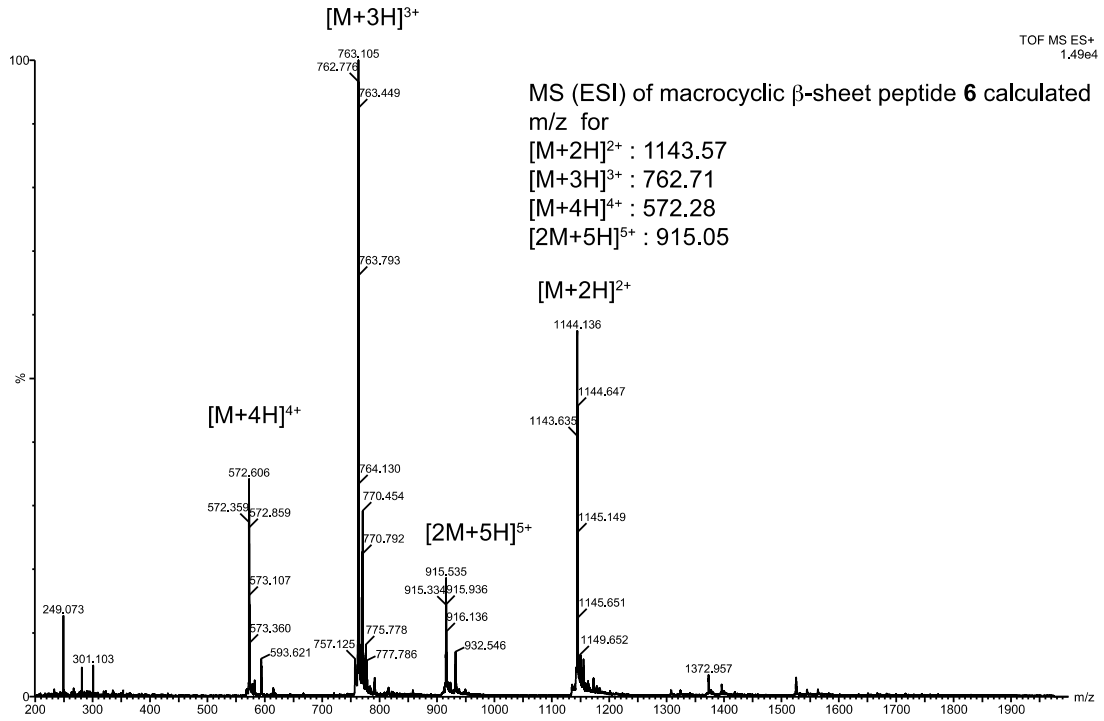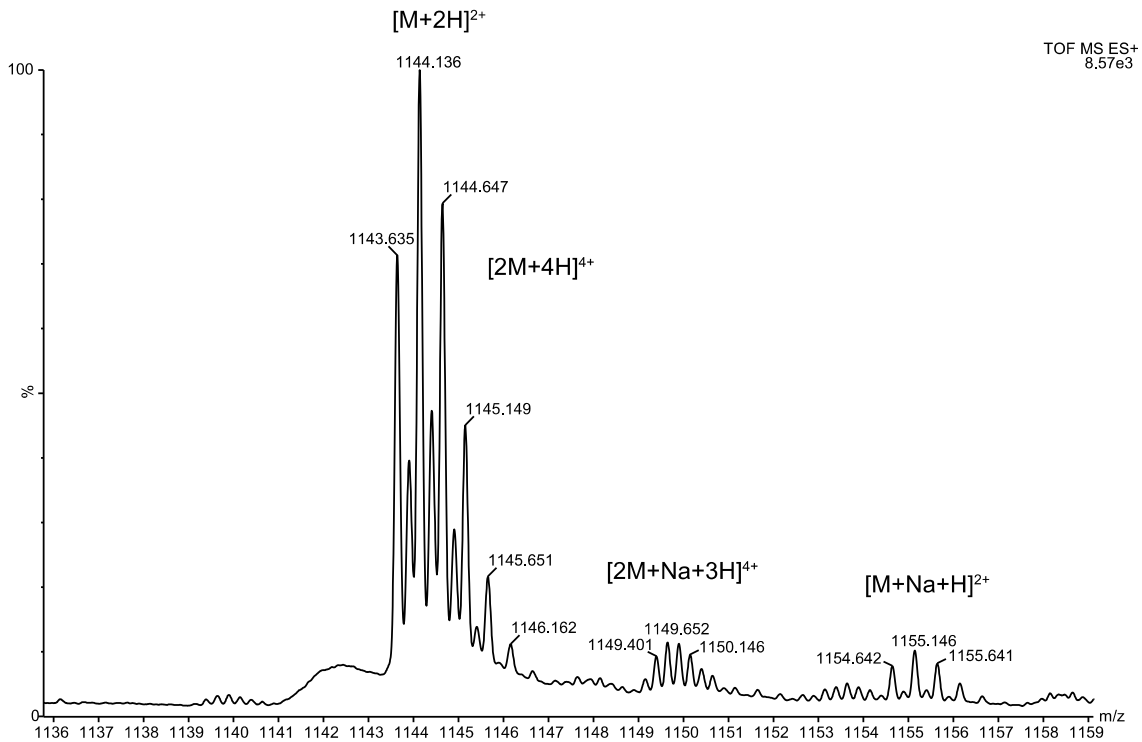

# Macrocyclic $\beta$ -sheet peptide **6**

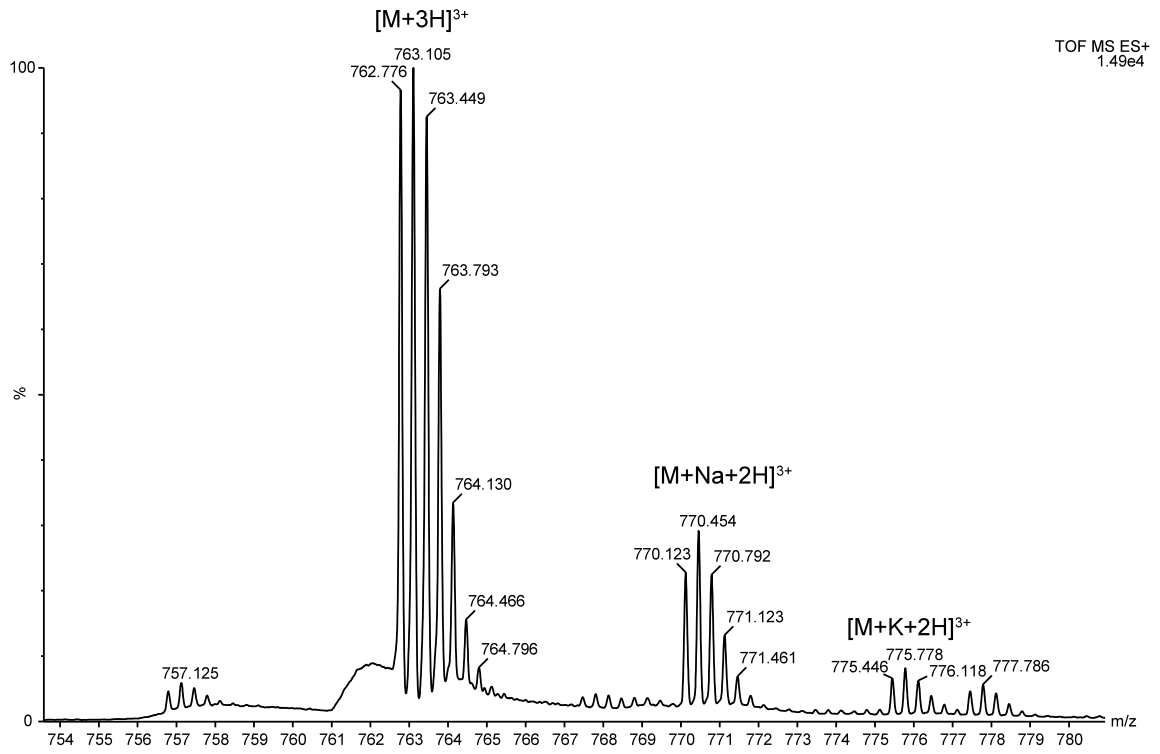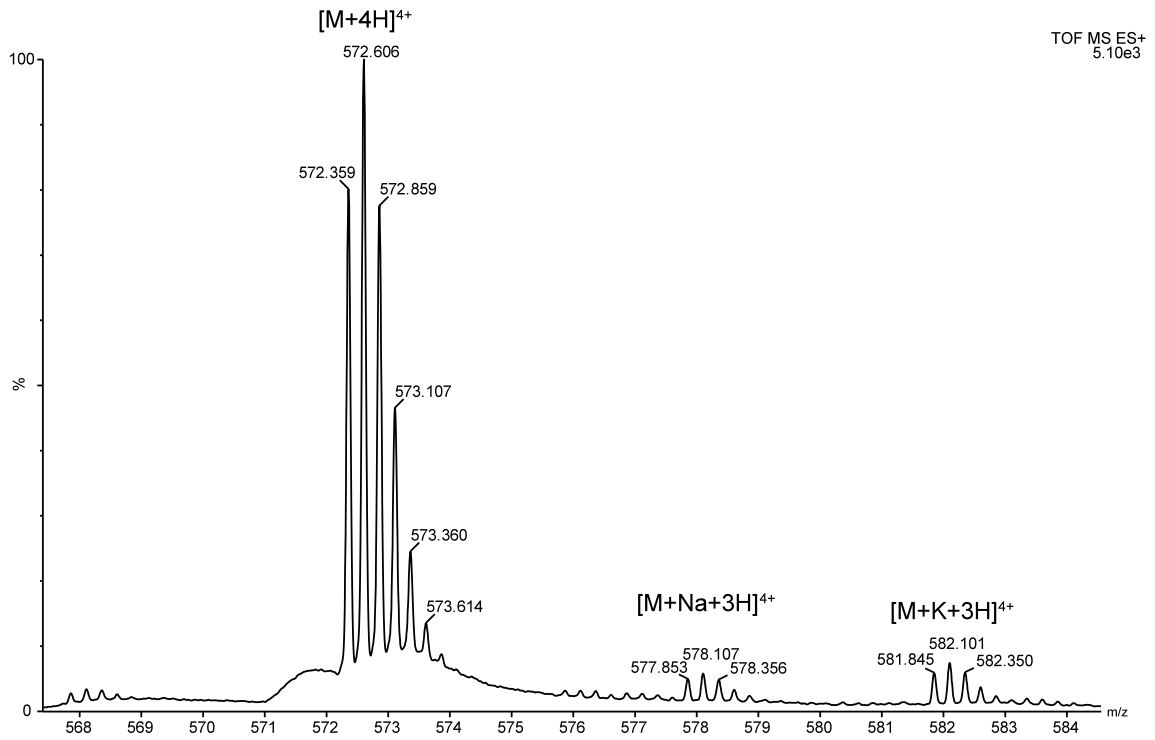



2D ROESY spectrum of macrocyclic  $\beta$ -sheet **6**  
2 mM in D<sub>2</sub>O, 500 MHz, 298 K  
150-ms spin-lock mixing time  
monomer predominates

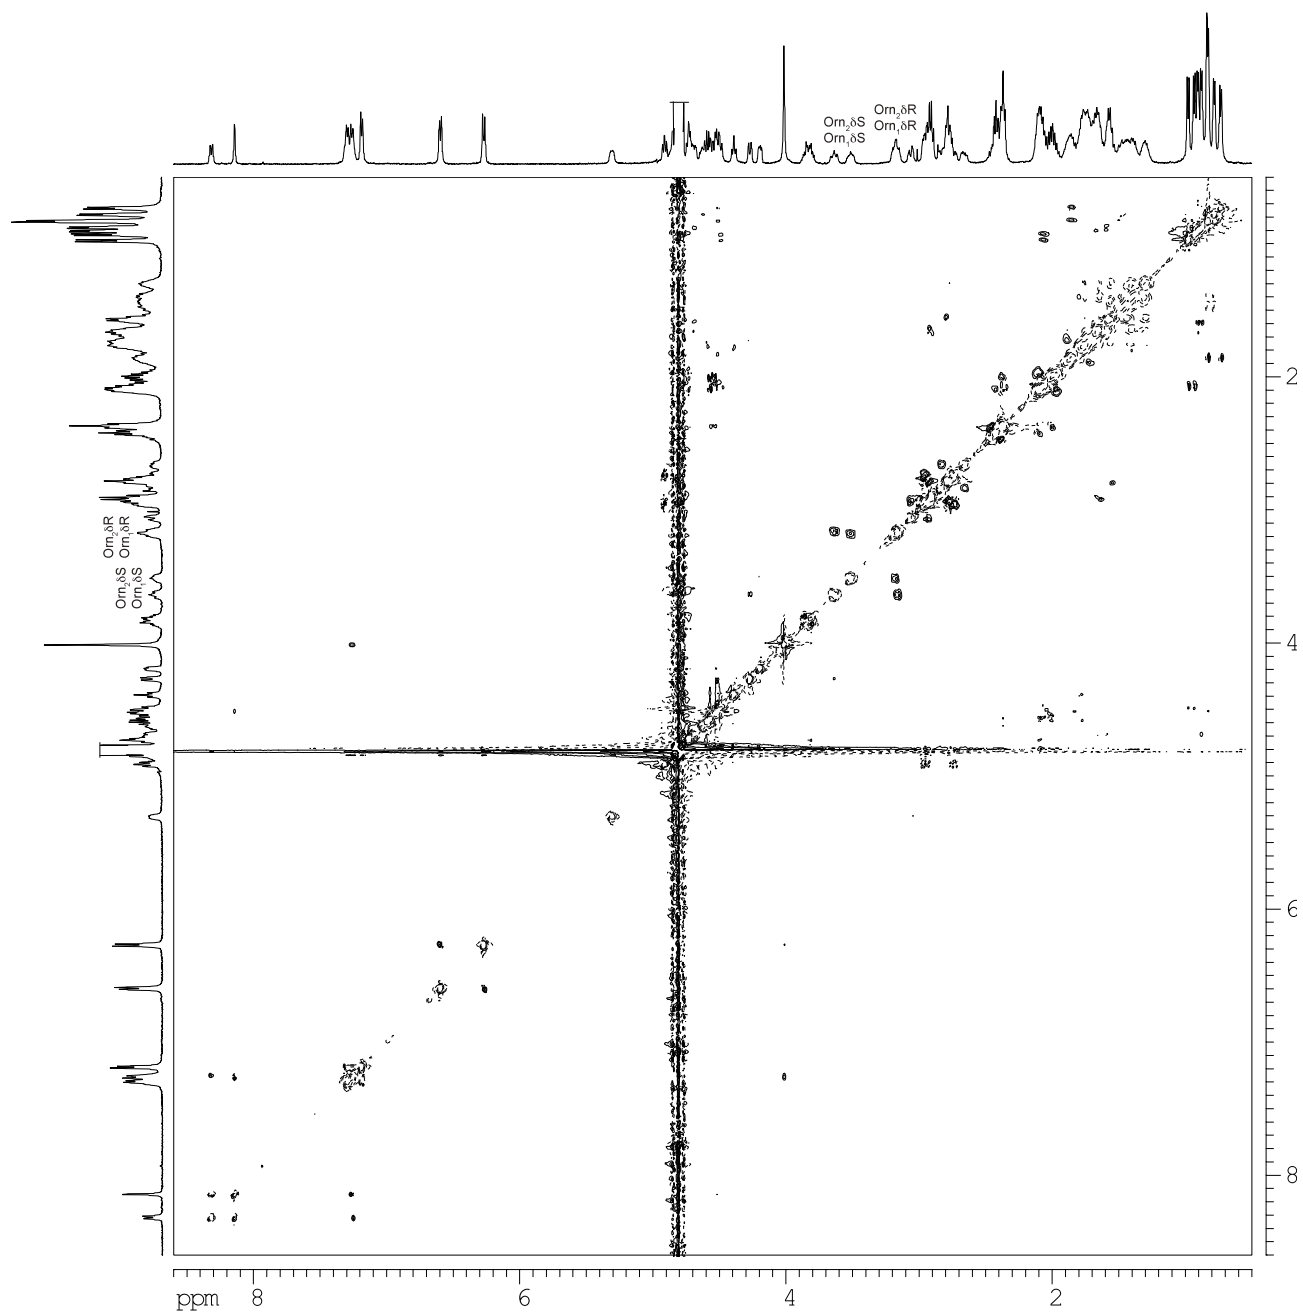



2D DOSY spectrum of macrocyclic  $\beta$ -sheet **6**  
2 mM in D<sub>2</sub>O, 600 MHz, 298 K  
monomer predominates

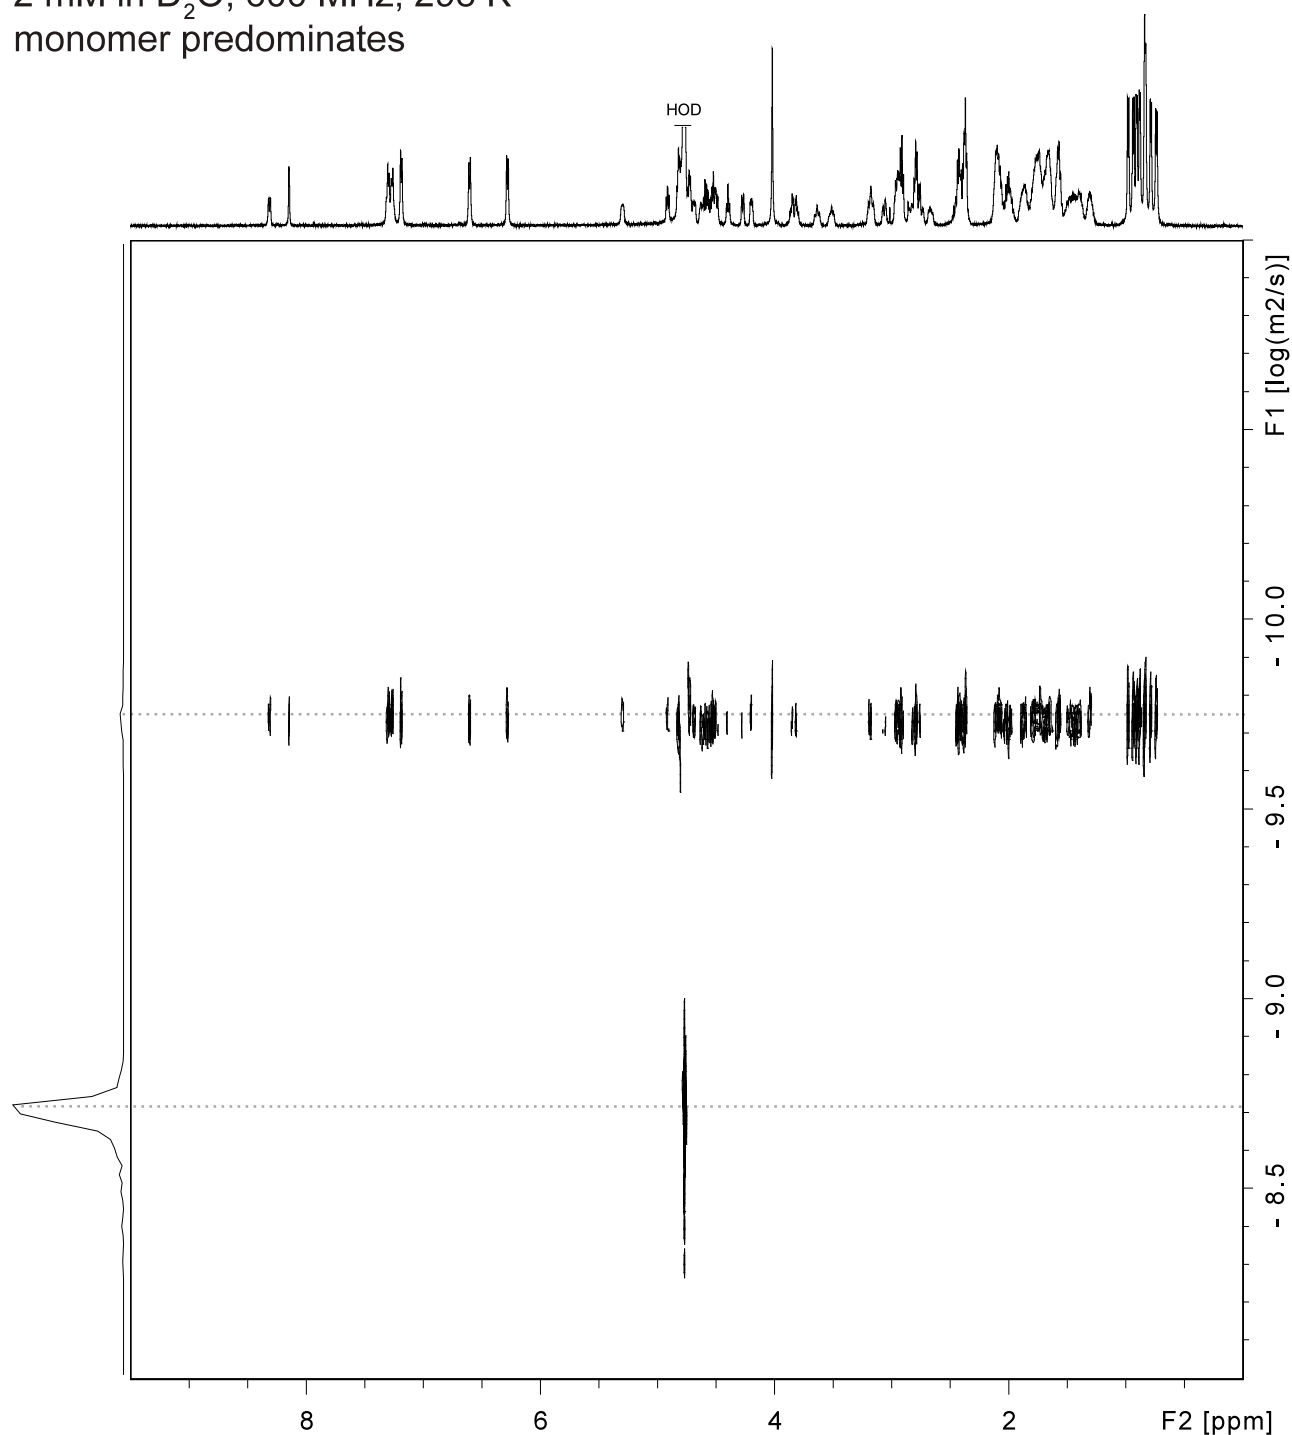

Calculation for peptide **6** at 2.0 mM

$$DC_{\text{HOD}} = 19.0 \times 10^{-10} \text{ m}^2/\text{s}^{\text{a}}$$
$$\log DC_{\text{HOD}} = -8.721$$

For peptide **6** tetramer,  $\log DC \text{ (m}^2/\text{s)} = -9.76(0)$ ,  $DC = 10^{-9.760} \text{ m}^2/\text{s} = 17.4 \times 10^{-11} \text{ m}^2/\text{s} = 17.4 \times 10^{-7} \text{ cm}^2/\text{s}$

<sup>a</sup> Longworth, L. G. J. Phys. Chem. 1960, 64, 1914–1917.
